# Supplementary material for: Characterization of Arabidopsis Transcriptional Responses to Different Aphid Species Reveals Genes that Contribute to Host Susceptibility and Non-host Resistance
Source: PLoS Pathog. 2015 May 20;11(5):e1004918. doi: 10.1371/journal.ppat.1004918 (PMC4439036; doi:10.1371/journal.ppat.1004918)
Supplement: S7 Table — 96 selected genes, from the volcano filtering and ANOVA analyses, showing an opposite expression patterns during host, poor-host, or nonhost interactions. +,- and = indicate respectivelly genes up- or down-regulated or unaffected during interaction with Myzus cerasi (Mc), M. persicae (Mp) and Rhopalosiphum padi (Rp). The array probe number, normalized expression value (fold changes were log2), TIGR ID number, Arabidopsis thaliana accession number, the gene bank accession are given for each gene that showed a differential expression. (XLSX) [file ppat.1004918.s017.xlsx]

## Sheet: Legend
Table S7. Set of 96 Arabidopsis genes with opposite expression profiles during host, adapted, or nonhost interactions.
96 selected genes, from the Volcano and Bonforroni, showing opposite expression patterns during host, adapted or nonhost interactions.
+,- and =indicate respectivelly genes up- or down-regulated or unaffected during interaction with Myzus cerasi (Mc), M. persicae (Mp) and Rhopalosiphum padi (Rp).
The array probe number, normalized expression value (fold changes were log2), TIGR ID number, Arabidopsis thaliana accession number, the gene bank accession are given for each genes that showed a differential expression.

## Sheet: 96 selected genes
									Type	without aphid	M. cerasi	M. persicae	R. padi	without aphid	M. cerasi	M. persicae	R. padi	without aphid	M. cerasi	M. persicae	R. padi
Volcano plot analysis						Bonferroni analysis			Time	3h				6h				24h
Mc+	Mc-	Mp+	Mp-	Rp+	Rp-				Systematic	log2												TIGRID	At accession	GenbankAccession	Gene function	GO
3h			3h			Wt<Mc-3h and Wt>Mp-3h			A_84_P14274	-0.187554	1.08821	-2.17538	0.709487	-0.0219094	0.428927	1.05444	1.36196	-0.0142419	-0.358652	0.736392	-0.269989	TC292541	AT1G52690.1	NM_202280	late embryogenesis abundant protein, putative / LEA protein, putative	GO:0003674(molecular_function)	GO:0005575(cellular_component)	GO:0009793(embryonic development ending in seed dormancy)
3h			3h			Wt<Mc-3h and Wt>Mp-3h			A_84_P109472/A_84_P863449	0.0678617	1.1219	-1.43942	0.048151	-0.012785	0.527187	0.92526	1.91265	0.0276808	-1.60114	-0.122708	-1.54889	TC311639	AT2G47770.1	NM_130344	benzodiazepine receptor-related	GO:0003674(molecular_function)	GO:0008150(biological_process)	GO:0016021(integral to membrane)
6h			6h						A_84_P296664	0.281412	0.819596	-0.280884	1.01872	0.00673682	0.795364	-0.802219	0.347717	0.0657835	0.523004	0.755179	0.893176	TC292123	AT3G21550.1	NM_113050	hypothetical protein	GO:0003674(molecular_function)	GO:0005575(cellular_component)
6h			6h						A_84_P20589	0.378199	-0.190278	-0.269108	0.267878	0.0391622	0.775459	-1.32601	-0.0229901	-0.0381806	0.639848	1.1342	0.784987	NP231753	AT5G16530.1	NM_121659	PIN5 (PIN-FORMED 5); auxin:hydrogen symporter/ transporter	GO:0005215(transporter activity)	GO:0009672(auxin:hydrogen symporter activity)	GO:0009926(auxin polar transport)	GO:0012505(endomembrane system)	GO:0016021(integral to membrane)
		24h			24h	Wt<Mp-24h and Wt>Rp-24h			A_84_P18335	0.410985	0.501028	-1.21733	0.319677	0.00831316	0.56604	-0.100144	1.09066	0.00989299	0.1636	1.15894	-0.795292	TC302341	AT3G02480.1	NM_111115	ABA-responsive protein-related	GO:0003674(molecular_function)	GO:0005575(cellular_component)	GO:0008150(biological_process)
		24h			24h				A_84_P519046	0.475602	-1.29637	-1.6814	-1.7139	-0.0966971	-0.841967	-1.37269	-1.34323	0.0227321	0.492328	1.11663	-1.16794	TC281441	AT3G09450.1	NM_111779	hypothetical protein
		24h			24h	Wt<Mp-24h and Wt>Rp-24h			A_84_P536936	0.0509914	1.11125	0.282676	0.634535	0.124513	0.109157	0.521691	1.16538	-0.0594207	0.381609	1.1492	-1.28873	TC310597	AT4G01985.1	NM_202770	hypothetical protein	GO:0003674(molecular_function)	GO:0008150(biological_process)	GO:0012505(endomembrane system)
			6h	6h					A_84_P862159	0.0857795	0.281923	-0.573794	0.378529	0.0887082	0.767821	-0.73642	0.82551	-0.129267	0.638056	0.734881	1.667	TC313776	AT2G24850.1	NM_128044	TAT3 (TYROSINE AMINOTRANSFERASE 3); transaminase	GO:0004838(tyrosine transaminase activity)	GO:0005575(cellular_component)	GO:0008483(transaminase activity)	GO:0009058(biosynthetic process)	GO:0009611(response to wounding)	GO:0009753(response to jasmonic acid stimulus)
			6h	6h		wt>Mp-6h and Wt<Rp-6h			A_84_P818915/A_84_P149978	0.66882	-0.531377	-1.34753	-0.1943	-0.120004	0.604167	-1.09823	0.68082	-0.0319175	1.77991	2.35849	2.78803	TC302619	AT4G01080.1	NM_116338	hypothetical protein	GO:0005575(cellular_component)	GO:0008150(biological_process)
			6h	6h					A_84_P14928	0.471329	0.0385484	-0.186685	0.158536	0.0617599	-0.230473	-0.834294	0.769606	0.0364488	-0.740414	-0.311008	-0.650934	TC311079	AT5G24140.1	NM_122319	SQP2 (Squalene monooxygenase 2); oxidoreductase	GO:0012505(endomembrane system)	GO:0016126(sterol biosynthetic process)	GO:0016491(oxidoreductase activity)
			6h	6h					A_84_P22519	0.00416718	0.0149398	-1.44174	-0.53026	0.101961	0.474439	-0.835701	1.00615	0.0737361	-0.759943	-0.339946	0.49439	TC286016	AT5G38130.1	NM_123173	transferase family protein	GO:0016740(transferase activity)
						Wt<Mc-3h and Wt=Mp-3h			A_84_P17864	0.0176613	0.854165	0.0273426	0.139731	-0.0117417	0.0716509	-1.22777	-0.583678	-0.00262556	-0.799194	-0.368141	0.0506536	TC283458	AT5G58860.1	NM_125276	CYP86A1 (cytochrome P450, family 86, subfamily A, polypeptide 1); oxygen binding	GO:0006631(fatty acid metabolic process)	GO:0008393(fatty acid (omega-1)-hydroxylase activity)	GO:0010345(suberin biosynthetic process)	GO:0012505(endomembrane system)	GO:0019825(oxygen binding)
						Wt<Mc-3h and Wt>Mp-3h			A_84_P127071	-0.249587	0.760034	-1.11755	0.36608	0.0704033	0.456747	1.77004	1.91939	0.0268652	-1.66034	0.0808267	-1.525	TC298057	AT5G05220.1	NM_120604	hypothetical protein	GO:0003674(molecular_function)	GO:0008150(biological_process)
						Wt<Mc-6h and Wt=Mp-6h			A_84_P146938	0.536607	-0.091193	-1.1007	-0.598836	-0.0480757	1.44651	-0.0916151	1.05803	-0.0180972	1.79835	1.76902	1.78735	TC298273	AT1G02450.1	NM_100126	NIMIN-1/NIMIN1; protein binding	GO:0005515(protein binding)	GO:0005575(cellular_component)	GO:0010112(regulation of systemic acquired resistance)	GO:0016481(negative regulation of transcription)	GO:0042742(defense response to bacterium)
						Wt<Mc-6h and Wt=Mp-6h			A_84_P261290	-0.0641679	-0.579837	-0.50958	-0.647854	0.00111302	0.706284	-0.0183707	0.297283	0.029314	0.580909	0.736927	0.233445	NP313521	AT1G31540.1	NM_102893	disease resistance protein (TIR-NBS-LRR class), putative	GO:0000166(nucleotide binding)	GO:0004888(transmembrane receptor activity)	GO:0005515(protein binding)	GO:0005524(ATP binding)	GO:0006952(defense response)	GO:0017111(nucleoside-triphosphatase activity)	GO:0031224(intrinsic to membrane)
						Wt<Mc-6h and Wt=Mp-6h			A_84_P599034	-0.027554	-0.177355	-0.0957755	-0.0114419	0.0136732	1.0149	0.0106293	0.58702	-0.0384876	-0.0284265	0.372897	-0.0485802		AT3G16860.1	NM_112562	COBL8 (COBRA-LIKE PROTEIN 8 PRECURSOR)	GO:0008150(biological_process)	GO:0031225(anchored to membrane)
						Wt<Mc-6h and Wt=Mp-6h			A_84_P862560	0.0654311	-0.0852396	-0.612626	-0.406786	-0.0252082	0.682995	-0.000941983	-0.03478	-0.0117426	1.29287	0.983425	0.69996	TC313980	AT3G17800.1	NM_112661	hypothetical protein	GO:0003674(molecular_function)	GO:0009507(chloroplast)	GO:0010224(response to UV-B)
						Wt<Mc-6h and Wt=Mp-6h			A_84_P763290	-0.222842	-0.399564	-0.133559	-0.348814	-0.0792919	0.754991	-0.0967847	0.172058	-0.000300692	0.244368	1.14586	0.187447		AT4G23810.1	NM_118512	WRKY53 (WRKY DNA-binding protein 53); DNA binding / protein binding / transcription activator/ transcription factor	GO:0003677(DNA binding)	GO:0003700(transcription factor activity)	GO:0005515(protein binding)	GO:0005634(nucleus)	GO:0006355(regulation of transcription, DNA-dependent)	GO:0009816(defense response to bacterium, incompatible interaction)	GO:0016563(transcription activator activity)	GO:0031347(regulation of defense response)	GO:0045941(positive regulation of transcription)
						Wt<Mc-6h and Wt=Mp-6h			A_84_P740964	0.0895241	-0.0266375	0.357238	-0.0391719	-0.0327968	0.807366	-0.0457595	0.433272	-0.0230423	0.701074	0.949156	0.259945	TC307589	AT5G08760.1	NM_001085080	hypothetical protein	GO:0012505(endomembrane system)
						Wt<Mc-6h and Wt=Mp-6h			A_84_P845967/A_84_P11143	0.00946831	0.24047	-1.00222	-0.0883366	0.0101983	1.73377	-0.0129004	1.43397	0.0395526	1.71282	1.80047	2.09232	TC294674	AT5G22570.1	NM_122163	WRKY38 (WRKY DNA-binding protein 38); transcription factor	GO:0003700(transcription factor activity)	GO:0005634(nucleus)	GO:0006355(regulation of transcription, DNA-dependent)
						Wt<Mc-6h and wt>Mp-6h			A_84_P756427	0.558758	-0.886325	-1.35573	-0.21449	0.0353775	1.03248	-0.860574	-0.0544207	-0.0252085	3.12112	3.59135	2.26877	TC289330	AT2G27420.1	NM_128302	cysteine proteinase, putative	GO:0006508(proteolysis)	GO:0008234(cysteine-type peptidase activity)	GO:0012505(endomembrane system)
						Wt<Mc-6h and wt>Mp-6h			A_84_P16850	-0.00528992	0.576435	-0.482677	0.546559	-0.014816	0.740946	-0.967538	0.0408932	-0.0230845	0.646041	1.08075	0.985217	TC293094	AT5G40020.1	NM_123365	pathogenesis-related thaumatin family protein	GO:0003674(molecular_function)	GO:0012505(endomembrane system)	GO:0051707(response to other organism)
						Wt<Mc-6h and wt>Mp-6h			A_84_P515014	0.280324	0.995094	-0.270913	1.17542	0.0541702	0.793243	-0.958581	0.288202	0.0281484	0.61653	0.822268	0.983792	TC296298	AT5G48920.1	NM_124269	hydroxyproline-rich glycoprotein family protein	GO:0003674(molecular_function)	GO:0008150(biological_process)
						Wt<Mp-24h and Wt=Rp-24h			A_84_P21754	-0.00854954	-0.12354	0.149981	-0.182712	0.00316216	1.41505	0.816545	0.633369	-0.00954092	0.509501	0.795966	-0.0330282	TC289089	AT1G23710.1	NM_102219	hypothetical protein	GO:0003674(molecular_function)	GO:0005575(cellular_component)	GO:0008150(biological_process)
						Wt<Mp-24h and Wt=Rp-24h			A_84_P609485	-0.014984	-0.00789683	-0.585013	-0.456606	0.00142712	-0.00846995	-0.434809	0.087562	-0.010354	0.462392	0.726258	0.00554235	TC301142	AT1G79520.1	NM_106600	cation efflux family protein	GO:0006812(cation transport)	GO:0008324(cation transmembrane transporter activity)	GO:0016020(membrane)
						Wt<Mp-24h and Wt=Rp-24h			A_84_P785047	0.147061	-0.472003	-0.654512	-0.370522	-0.00420384	0.508111	0.304991	0.646202	0.0260082	0.470363	0.838429	0.0702605	TC284810	AT2G36780.1	NM_129233	UDP-glucoronosyl/UDP-glucosyl transferase family protein	GO:0005575(cellular_component)	GO:0008152(metabolic process)	GO:0008194(UDP-glycosyltransferase activity)	GO:0016757(transferase activity, transferring glycosyl groups)
						Wt<Mp-24h and Wt=Rp-24h			A_84_P245045	0.0265301	0.173767	0.341771	0.0476216	-0.00445791	1.29052	0.408147	0.555291	-0.0100074	0.433287	0.765654	0.0133918	TC305412	AT5G64660.1	NM_125862	U-box domain-containing protein	GO:0000151(ubiquitin ligase complex)	GO:0004842(ubiquitin-protein ligase activity)	GO:0005488(binding)	GO:0016567(protein ubiquitination)
						Wt<Mp-24h and Wt>Rp-24h			A_84_P297634	0.216417	-0.25675	-0.715937	-0.762557	0.0151549	0.0759794	-0.324788	-0.0317538	0.00211199	-0.240878	0.734561	-0.908523	TC286160	AT5G15500.1	NM_180494	ankyrin repeat family protein	GO:0005515(protein binding)	GO:0008150(biological_process)	GO:0012505(endomembrane system)
						Wt<Mp-24h and Wt>Rp-24h			A_84_P19758	0.28225	0.339021	0.0791804	0.233595	0.0132368	0.448149	-0.364861	0.64548	-0.0460297	0.792616	0.985334	-0.922637	TC299264	AT5G59310.1	NM_125322	LTP4 (LIPID TRANSFER PROTEIN 4); lipid binding	GO:0006869(lipid transport)	GO:0008289(lipid binding)	GO:0009737(response to abscisic acid stimulus)	GO:0012505(endomembrane system)
						wt<Mp-6h and Wt=Rp-6h			A_84_P12978	-0.00193727	-0.498709	0.0371163	-0.197015	0.0159836	-0.0694586	0.858779	0.000594264	0.0189769	-0.457365	-0.68294	-0.525151	TC287254	AT5G01810.1	NM_001036743	CIPK15 (CBL-INTERACTING PROTEIN KINASE 15); kinase	GO:0004672(protein kinase activity)	GO:0009738(abscisic acid mediated signaling)	GO:0009788(negative regulation of abscisic acid mediated signaling)	GO:0016301(kinase activity)
						wt<Mp-6h and Wt=Rp-6h			A_84_P16885	-0.293767	0.0493165	0.0637828	0.0753061	-0.00220002	0.228221	0.772431	0.013611	-0.0151918	-0.419743	-1.34634	-0.72362	TC297225	AT5G49360.1	NM_124313	BXL1 (BETA-XYLOSIDASE 1); hydrolase, hydrolyzing O-glycosyl compounds	GO:0004553(hydrolase activity, hydrolyzing O-glycosyl compounds)	GO:0005975(carbohydrate metabolic process)	GO:0012505(endomembrane system)
						Wt=Mc-24h and Wt<Mp-24h			A_84_P302850	0.121432	0.411336	-1.07656	-0.297864	-0.00338966	-0.192975	-1.30206	-0.220573	-0.0350541	0.0114971	1.23849	-0.577804	TC297604	AT2G37870.1	NM_129343	protease inhibitor/seed storage/lipid transfer protein (LTP) family protein	GO:0006869(lipid transport)	GO:0008289(lipid binding)	GO:0012505(endomembrane system)
						Wt=Mc-24h and Wt>Mp-24h			A_84_P542646	0.0895468	-0.36082	0.377766	0.825601	0.00889834	0.46197	1.4993	0.405216	-3.18121e-05	-0.00629243	-0.91033	1.52832	TC288936	AT1G15040.1	NM_101374	glutamine amidotransferase-related	GO:0003824(catalytic activity)	GO:0005575(cellular_component)	GO:0006541(glutamine metabolic process)	GO:0016787(hydrolase activity)
						Wt=Mc-24h and Wt>Mp-24h			A_84_P728892	0.0232046	0.173938	0.150207	0.324811	0.0285332	0.59469	1.73298	0.906935	0.0456644	0.0837718	-1.00833	0.120358		AT3G45300.1	NM_114399	IVD (ISOVALERYL-COA-DEHYDROGENASE)	GO:0005739(mitochondrion)	GO:0005759(mitochondrial matrix)	GO:0006552(leucine catabolic process)	GO:0008470(isovaleryl-CoA dehydrogenase activity)
						Wt=Mc-24h and Wt>Mp-24h			A_84_P20655	-0.123279	-0.868516	-1.26739	-0.915771	0.00817092	-0.921981	-1.40493	-2.08768	-0.00325013	0.0338368	-0.796661	-0.333938	TC311156	AT5G45830.1	NM_123951	DOG1 (DELAY OF GERMINATION 1)	GO:0003674(molecular_function)	GO:0005575(cellular_component)	GO:0010162(seed dormancy)
						Wt=Mc-24h and Wt>Mp-24h			A_84_P851517	0.0226259	0.07943	0.131428	0.40105	0.0352257	0.34365	0.830047	0.0812603	-0.0622858	-0.0672041	-1.08699	-0.0814171	TC306473	AT5G56870.1	NM_125070	BGAL4 (beta-galactosidase 4); beta-galactosidase	GO:0004565(beta-galactosidase activity)	GO:0005975(carbohydrate metabolic process)	GO:0005990(lactose catabolic process)	GO:0009341(beta-galactosidase complex)	GO:0012505(endomembrane system)	GO:0019513(lactose catabolic process, using glucoside 3-dehydrogenase)	GO:0019515(lactose catabolic process via UDP-galactose)
						Wt=Mc-3h and wt <Mp-3h			A_84_P535484	-0.123532	-0.0765077	0.598049	0.299932	-0.0182375	0.0632053	0.075327	-0.117841	-0.0491051	-1.43115	-1.77532	-1.57839	TC310807	AT1G03010.1	NM_100182	phototropic-responsive NPH3 family protein	GO:0004871(signal transducer activity)	GO:0009416(response to light stimulus)
						Wt=Mc-3h and Wt>Mp-3h			A_84_P14635	0.0440437	0.0145258	-0.773941	-0.144562	0.0314294	-0.0182406	-1.1252	-0.0518077	0.0330257	0.398662	0.497641	0.224012	TC285214	AT1G02460.1	NM_100127	glycoside hydrolase family 28 protein / polygalacturonase (pectinase) family protein	GO:0004650(polygalacturonase activity)	GO:0005975(carbohydrate metabolic process)
						Wt=Mc-3h and Wt>Mp-3h			A_84_P751365	-0.0323448	-0.0487419	-0.889992	-0.276939	0.0223259	0.0962636	-1.01918	-0.0885322	0.00607702	0.40262	0.648461	1.01648	TC285545	AT1G45201.1	NM_202246	hypothetical protein	GO:0003729(mRNA binding)	GO:0004806(triacylglycerol lipase activity)	GO:0006629(lipid metabolic process)	GO:0012505(endomembrane system)
						Wt=Mc-3h and Wt>Mp-3h			A_84_P549850	0.153295	0.115667	-1.82355	-0.542944	-0.0574618	0.458239	0.697862	1.23456	0.0265281	-1.24298	0.424401	-1.39967	TC306656	AT1G60190.1	NM_104709	armadillo/beta-catenin repeat family protein / U-box domain-containing protein	GO:0000151(ubiquitin ligase complex)	GO:0004842(ubiquitin-protein ligase activity)	GO:0005488(binding)	GO:0005515(protein binding)	GO:0008270(zinc ion binding)	GO:0016567(protein ubiquitination)
						Wt=Mc-3h and Wt>Mp-3h			A_84_P178164	-0.104692	-0.0945862	-1.33696	-1.00778	0.0203475	-0.153863	-1.22677	-0.820305	-0.018445	-0.601189	-0.278604	-0.341175	TC304463	AT1G70850.1	NM_001036188	MLP34 (MLP-LIKE PROTEIN 34)	GO:0003674(molecular_function)	GO:0005575(cellular_component)	GO:0006952(defense response)	GO:0009607(response to biotic stimulus)
						Wt=Mc-3h and Wt>Mp-3h			A_84_P757222	-0.0166389	0.0080127	-1.98401	-0.889371	-0.0222695	-0.921129	-1.56019	-0.350551	0.0303594	1.09347	1.45411	1.70598		AT2G16367.1		pseudo
						Wt=Mc-3h and Wt>Mp-3h			A_84_P762197	0.0904774	0.0531232	-1.16674	-0.747498	-0.0205773	-1.02158	-0.899519	-0.247609	-0.00674658	-1.79918	-1.16511	-2.29887	TC301957	AT3G03341.1	NM_001125087	hypothetical protein
						Wt=Mc-3h and Wt>Mp-3h			A_84_P859998	0.0867259	0.0594872	-0.610524	0.0431586	0.0326192	0.312624	-1.05807	-0.0553688	-0.0461731	0.621315	0.911665	1.12645	TC312512	AT3G54600.1	NM_115317	DJ-1 family protein	GO:0012505(endomembrane system)
						Wt=Mc-3h and Wt>Mp-3h			A_84_P145159	0.540552	0.586263	-1.83642	-0.181731	0.0507391	0.656352	0.872305	1.45042	-0.00644353	-0.93074	0.376799	-1.42728	TC288653	AT5G50360.1	NM_124417	hypothetical protein	GO:0003674(molecular_function)	GO:0008150(biological_process)
						Wt=Mc-3h and Wt>Mp-3h			A_84_P11248	0.151403	0.104923	-1.69552	-0.543749	0.00305402	-0.198286	-0.243645	0.543198	0.0327786	-1.43964	-0.628425	-1.54821	TC284619	AT5G59220.1	NM_125312	protein phosphatase 2C, putative / PP2C, putative	GO:0004722(protein serine/threonine phosphatase activity)	GO:0009507(chloroplast)	GO:0009737(response to abscisic acid stimulus)
						Wt=Mc-6h and wt<Mp-6h			A_84_P13306	-0.108086	0.208748	0.471815	0.473833	-0.0742157	-0.0981545	0.72395	-0.152751	-0.0565993	-0.883581	-1.51376	-0.855433	NP036303	AT1G03090.1	NM_179252	MCCA (3-methylcrotonyl-CoA carboxylase 1)	GO:0004485(methylcrotonoyl-CoA carboxylase activity)	GO:0005739(mitochondrion)	GO:0006552(leucine catabolic process)
						Wt=Mc-6h and wt<Mp-6h			A_84_P17510	-0.20044	-0.177973	-0.0273863	-0.200935	-0.0655292	-0.0654822	0.666282	0.00950866	-0.000530198	-0.944115	-1.39425	-0.848834	TC283879	AT1G23870.1	NM_102235	ATTPS9 (Arabidopsis thaliana trehalose-phosphatase/synthase 9); transferase, transferring glycosyl groups / trehalose-phosphatase	GO:0004805(trehalose-phosphatase activity)	GO:0005992(trehalose biosynthetic process)	GO:0016757(transferase activity, transferring glycosyl groups)
						Wt=Mc-6h and wt<Mp-6h	wt<Mp-6h and Wt=Rp-6h		A_84_P832673/A_84_P529724	0.13387	0.0234098	-0.04854	-0.188494	-0.0266293	0.0115759	0.805381	-0.09945	0.0072168	-0.830696	-0.903945	-0.527407	TC308723	AT3G20340.1	NM_112925	hypothetical protein	GO:0003674(molecular_function)	GO:0005575(cellular_component)	GO:0006499(N-terminal protein myristoylation)
						Wt=Mc-6h and wt<Mp-6h			A_84_P92059	-0.0449871	0.045422	0.159024	0.232852	0.0246611	0.00159197	0.789268	0.132724	-0.00175241	-0.989381	-0.911411	-0.646979	TC288868	AT5G67480.1	NM_203278	BT4 (BTB AND TAZ DOMAIN PROTEIN 4); protein binding / transcription regulator	GO:0005515(protein binding)	GO:0005634(nucleus)	GO:0006355(regulation of transcription, DNA-dependent)	GO:0030528(transcription regulator activity)
						Wt=Mc-6h and wt>Mp-6h			A_84_P17028	-0.0201756	-0.52142	-1.02853	-0.584533	-0.00318888	-0.00647676	-1.6248	-0.402397	-3.07932e-05	0.420752	0.763419	0.852397	TC285735	AT1G62560.1	NM_104934	flavin-containing monooxygenase family protein / FMO family protein	GO:0004497(monooxygenase activity)	GO:0006118(electron transport)
						Wt=Mc-6h and wt>Mp-6h			A_84_P21842	-0.0256418	-0.430306	-1.03618	-0.426872	-0.0048893	-0.000308886	-1.64542	-0.279483	-0.00318838	0.353146	0.65138	0.914626	TC285921	AT1G65860.1	NM_105258	flavin-containing monooxygenase family protein / FMO family protein	GO:0004497(monooxygenase activity)	GO:0005575(cellular_component)	GO:0006118(electron transport)
						Wt=Mc-6h and wt>Mp-6h			A_84_P14954	-0.173267	-0.91162	-1.4292	-1.15211	-0.000590127	-0.0493391	-0.831984	-0.466853	-0.0198264	1.4383	1.87527	1.48686	TC298622	AT1G73600.1	NM_001124125	phosphoethanolamine N-methyltransferase	GO:0000234(phosphoethanolamine N-methyltransferase activity)	GO:0008152(metabolic process)
						Wt=Mc-6h and wt>Mp-6h			A_84_P23021	0.243154	-0.644856	-1.40697	-1.17076	0.129721	0.159927	-0.920608	-0.206078	0.0159726	0.827091	1.17071	0.524057	TC312054	AT2G29090.1	NM_128466	CYP707A2 (cytochrome P450, family 707, subfamily A, polypeptide 2); oxygen binding	GO:0009639(response to red or far red light)	GO:0009687(abscisic acid metabolic process)	GO:0010114(response to red light)	GO:0010295((+)-abscisic acid 8'-hydroxylase activity)	GO:0012505(endomembrane system)	GO:0019825(oxygen binding)	GO:0048838(release of seed from dormancy)
						Wt=Mc-6h and wt>Mp-6h			A_84_P191534	0.0205892	-0.104482	-0.145091	-0.00330984	0.00870023	0.00743118	-0.821278	-0.180992	0.0342245	0.372903	0.626592	0.508716	TC292310	AT2G37580.1	NM_129313	zinc finger (C3HC4-type RING finger) family protein	GO:0005515(protein binding)	GO:0008270(zinc ion binding)	GO:0016757(transferase activity, transferring glycosyl groups)
						Wt=Mc-6h and wt>Mp-6h			A_84_P11568	0.0357653	-0.19001	-0.666046	-0.235028	0.0038288	-0.0154915	-0.898892	-0.111664	0.0532746	0.929038	0.923189	0.979595	TC282061	AT2G40460.1	NM_129607	proton-dependent oligopeptide transport (POT) family protein	GO:0005215(transporter activity)	GO:0006857(oligopeptide transport)	GO:0009624(response to nematode)	GO:0016020(membrane)
						Wt=Mc-6h and wt>Mp-6h			A_84_P276620	-0.00151736	0.222906	0.126334	0.497505	0.00123873	0.0165124	-0.96731	-0.208735	-0.029743	-0.227512	0.0288397	0.26952	TC292191	AT3G26960.1	NM_113610	hypothetical protein	GO:0003674(molecular_function)	GO:0008150(biological_process)	GO:0012505(endomembrane system)
						Wt=Mc-6h and wt>Mp-6h			A_84_P11805	-0.138369	-0.434708	-0.667158	-0.297216	0.0035237	0.0117751	-0.88507	-0.434458	0.00783473	0.947464	1.41078	0.589473	TC304958	AT3G47420.1	NM_114610	glycerol-3-phosphate transporter, putative / glycerol 3-phosphate permease, putative	GO:0005351(sugar:hydrogen symporter activity)	GO:0008643(carbohydrate transport)	GO:0016021(integral to membrane)
						Wt=Mc-6h and wt>Mp-6h			A_84_P825382	0.268735	-0.388717	-0.665885	-0.34954	-0.00599942	-0.0549082	-0.843714	-0.447657	0.0121308	0.988037	1.09005	0.591563	NP042413	AT3G51895.1	NM_115049	SULTR3;1 (SULFATE TRANSPORTER 1); sulfate transmembrane transporter	GO:0008272(sulfate transport)	GO:0015116(sulfate transmembrane transporter activity)	GO:0016020(membrane)	GO:0016021(integral to membrane)
						Wt=Mc-6h and wt>Mp-6h			A_84_P847162	0.331211	0.0347266	-1.52093	0.189144	0.0101395	0.0130561	-2.18751	-0.932198	-0.03157	1.58081	1.60311	1.60621	TC298912	AT4G16740.2	NM_001036574	ATTPS03 (Arabidopsis thaliana terpene synthase 03)	GO:0009611(response to wounding)	GO:0016099(monoterpenoid biosynthetic process)	GO:0042408(myrcene/(E)-beta-ocimene synthase activity)
						Wt=Mc-6h and wt>Mp-6h			A_84_P10977	-0.112519	-0.0620835	-0.424654	-0.338418	0.0261035	0.00524286	-0.759367	-0.382736	-0.0117747	0.550037	0.593387	0.428936	NP189147	AT4G18270.1	NM_117937	ATTRANS11 (Arabidopsis thaliana translocase 11); catalytic	GO:0003824(catalytic activity)	GO:0006486(protein amino acid glycosylation)	GO:0006629(lipid metabolic process)	GO:0015450(P-P-bond-hydrolysis-driven protein transmembrane transporter activity)	GO:0016020(membrane)
						Wt=Mc-6h and wt>Mp-6h			A_84_P20482	0.134331	-0.49408	-0.812483	-0.369496	0.00550387	0.00129907	-0.843384	-0.0670629	-0.0276464	0.428012	0.352479	0.827993	TC283777	AT4G29740.1	NM_179139	CKX4 (CYTOKININ OXIDASE 4); cytokinin dehydrogenase	GO:0008131(amine oxidase activity)	GO:0009823(cytokinin catabolic process)	GO:0012505(endomembrane system)	GO:0019139(cytokinin dehydrogenase activity)
						Wt=Mc-6h and wt>Mp-6h			A_84_P11975	0.14022	0.227422	-1.12592	0.0841987	-0.0682699	-0.035849	-1.12983	-0.185443	0.0426091	0.737108	1.20557	0.462509	TC296218	AT4G30460.1	NM_119192	glycine-rich protein	GO:0003674(molecular_function)	GO:0008150(biological_process)	GO:0012505(endomembrane system)
						Wt=Mc-6h and wt>Mp-6h			A_84_P506004	-0.0454241	0.365054	-0.0538014	0.233502	-0.0164232	-0.027407	-0.931849	-0.464602	0.0199276	0.73177	0.94576	0.64189	TC296045	AT5G01790.1	NM_120257	hypothetical protein	GO:0003674(molecular_function)	GO:0008150(biological_process)	GO:0009507(chloroplast)
						Wt=Mc-6h and wt>Mp-6h			A_84_P841901/A_84_P766211	-0.183023	-0.504886	-0.711867	-0.60394	-0.0235369	-0.0415005	-0.888241	-0.652673	0.034388	0.8824	0.667687	0.819193	NP230706	AT5G35490.1	NM_122940	hypothetical protein	GO:0003674(molecular_function)	GO:0008150(biological_process)
						Wt=Mc-6h and wt>Mp-6h			A_84_P182054	0.100589	0.720555	-0.14436	0.0395252	-0.0411382	-0.0363127	-1.39079	-0.489992	0.0139219	-0.676893	-0.138059	0.27478	TC286070	AT5G37690.1	NM_123128	GDSL-motif lipase/hydrolase family protein	GO:0006629(lipid metabolic process)	GO:0012505(endomembrane system)	GO:0016298(lipase activity)
						Wt=Mc-6h and wt>Mp-6h			A_84_P16919	-0.0491478	-0.202764	-0.911517	-0.453442	-0.0203816	-0.0483847	-1.10804	-0.673827	0.0646686	1.19928	1.37419	1.04233	NP230532	AT5G59130.1	NM_125303	subtilase family protein	GO:0004289(subtilase activity)	GO:0006508(proteolysis)	GO:0012505(endomembrane system)
						Wt=Mc-6h and wt>Mp-6h			A_84_P12228	-0.136867	-0.16573	-0.44557	-0.251836	-0.031944	-0.0270455	-0.991115	-0.423356	0.00041189	0.549599	0.6579	0.438833	TC281598	AT5G67280.1	NM_126128	RLK (RECEPTOR-LIKE KINASE); ATP binding / kinase/ protein serine/threonine kinase	GO:0004674(protein serine/threonine kinase activity)	GO:0005524(ATP binding)	GO:0006468(protein amino acid phosphorylation)	GO:0007169(transmembrane receptor protein tyrosine kinase signaling pathway)	GO:0009751(response to salicylic acid stimulus)	GO:0012505(endomembrane system)	GO:0016301(kinase activity)
						Wt=Mc-6h and wt>Mp-6h			A_84_P851416	-0.080443	-0.748451	-0.714655	-0.631342	-0.0346396	-0.0842861	-0.826582	-0.314715	0.0271374	0.614195	0.673789	0.445048	TC306366	TA36920_3702
						Wt=Mp-3h and wt>Rp-3h			A_84_P843330	0.345107	-0.218815	0.355674	-0.387444	-0.00220809	1.83103	0.380554	0.880305	0.0115099	1.26683	1.74039	0.229503	NP335312	NP335312
						Wt=Mp-6h and Wt<Rp-6h			A_84_P231269	0.0808098	0.393645	-0.331906	0.226142	0.00787468	0.300742	0.00724459	0.837282	-0.00296057	-0.456919	0.189023	-0.489218	TC304356	AT1G24600.1	NM_102302	hypothetical protein	GO:0003674(molecular_function)	GO:0005575(cellular_component)	GO:0008150(biological_process)
						Wt=Mp-6h and Wt<Rp-6h			A_84_P11607	0.288577	-0.406728	-0.600609	0.139486	-0.0229387	0.33988	0.00538668	1.40207	0.0515424	0.578725	1.0774	0.375263	TC284137	AT2G45570.1	NM_130119	CYP76C2 (cytochrome P450, family 76, subfamily C, polypeptide 2); oxygen binding	GO:0006118(electron transport)	GO:0019825(oxygen binding)
						Wt=Mp-6h and Wt>Rp-6h			A_84_P550153	-0.107749	-0.442338	-1.3174	-0.456526	-0.0672548	0.257142	-0.0414613	-1.17949	0.0169206	0.633191	-0.494892	0.731868		AT3G30720.1	NM_113975	hypothetical protein	GO:0003674(molecular_function)	GO:0005575(cellular_component)	GO:0008150(biological_process)
						Wt>Mc-3h and Wt=Mp-3h			A_84_P756652	-0.00389539	-0.751133	0.0350122	-0.603658	0.0734053	1.6652	1.27516	0.881568	0.0499504	1.03702	1.01337	0.335718	TC297539	AT2G35710.3	NM_201879	glycogenin glucosyltransferase (glycogenin)-related	GO:0009058(biosynthetic process)	GO:0012505(endomembrane system)	GO:0016051(carbohydrate biosynthetic process)	GO:0016757(transferase activity, transferring glycosyl groups)	GO:0016758(transferase activity, transferring hexosyl groups)
						Wt>Mc-3h and Wt=Mp-3h			A_84_P12143	0.13074	-0.599961	0.136407	-0.44604	0.0375713	1.67642	0.672546	1.01257	0.0133993	-0.0803461	0.693755	-0.512615	TC283689	AT5G45340.1	NM_180805	CYP707A3 (cytochrome P450, family 707, subfamily A, polypeptide 3); oxygen binding	GO:0009414(response to water deprivation)	GO:0009639(response to red or far red light)	GO:0010295((+)-abscisic acid 8'-hydroxylase activity)	GO:0012505(endomembrane system)	GO:0019825(oxygen binding)	GO:0046345(abscisic acid catabolic process)
						wt>Mc-6h and wt<Mp-6h			A_84_P22153	-0.186465	-0.372931	0.744836	0.582707	0.0127723	-0.730236	0.747245	-0.384817	0.00362731	-2.01305	-2.14509	-1.55854	TC301987	AT3G30775.1	NM_113981	ERD5 (EARLY RESPONSIVE TO DEHYDRATION 5); proline dehydrogenase	GO:0004657(proline dehydrogenase activity)	GO:0005739(mitochondrion)	GO:0006537(glutamate biosynthetic process)	GO:0006562(proline catabolic process)	GO:0006979(response to oxidative stress)
						Wt>Mp-24h and Wt<Rp-24h			A_84_P805566	0.139137	0.469118	-1.80909	-0.539727	-0.00477324	0.240783	-0.117849	0.890359	0.0138173	-0.929528	-0.784268	0.879857		AT5G24780.1	NM_122387	VSP1 (VEGETATIVE STORAGE PROTEIN 1)	GO:0003993(acid phosphatase activity)	GO:0006952(defense response)	GO:0008134(transcription factor binding)	GO:0009753(response to jasmonic acid stimulus)	GO:0012505(endomembrane system)
						Wt>Mp-24h and Wt=Rp-24h			A_84_P17706	0.044929	0.554166	-0.106396	0.561904	-0.00454503	0.0953695	-0.502722	-0.236461	-0.00815368	-1.34594	-0.786568	-0.0184692	TC300161	AT5G01870.1	NM_120265	lipid transfer protein, putative	GO:0006869(lipid transport)	GO:0008289(lipid binding)	GO:0012505(endomembrane system)
						Wt>Mp-24h and Wt=Rp-24h			A_84_P814618	-0.143172	-0.0144031	-0.00107038	-0.0377438	0.00389203	-0.314918	0.606977	-0.548204	-0.0315564	-0.461521	-1.3135	-0.0557999	TC288594	AT5G22920.1	NM_122198	zinc finger (C3HC4-type RING finger) family protein	GO:0008270(zinc ion binding)
						Wt>Mp-3h and Wt=Rp-3h			A_84_P785475	-0.0610774	-0.302674	-0.795663	-0.0756555	-0.00867227	0.385768	-0.672612	0.475695	-0.0167558	-0.171615	0.491649	0.419532	TC280847	AT1G17420.1	NM_101603	LOX3 (Lipoxygenase 3); iron ion binding / lipoxygenase/ metal ion binding / oxidoreductase, acting on single donors with incorporation of molecular oxygen, incorporation of two atoms of oxygen	GO:0005506(iron ion binding)	GO:0006952(defense response)	GO:0009507(chloroplast)	GO:0009611(response to wounding)	GO:0009695(jasmonic acid biosynthetic process)	GO:0016165(lipoxygenase activity)	GO:0016702(oxidoreductase activity, acting on single donors with incorporation of molecular oxygen, incorporation of two atoms of oxygen)	GO:0040007(growth)	GO:0046872(metal ion binding)
						Wt>Mp-3h and Wt=Rp-3h			A_84_P825539	0.145	-0.674462	-0.867912	0.13026	0.0866748	1.34044	0.212009	1.50048	-0.0589276	2.45171	1.4065	1.76195	TC311978	AT1G32350.1	NM_102968	AOX1D (ALTERNATIVE OXIDASE 1D); alternative oxidase	GO:0005739(mitochondrion)	GO:0005740(mitochondrial envelope)	GO:0006118(electron transport)	GO:0009916(alternative oxidase activity)
						Wt>Mp-3h and Wt=Rp-3h			A_84_P15194	0.263073	0.664415	-0.73986	0.295941	0.038604	1.18863	-0.123132	1.14067	0.0106173	0.0332189	-0.14707	1.58238	TC299585	AT1G54020.1	NM_179474	myrosinase-associated protein, putative	GO:0004091(carboxylesterase activity)	GO:0006629(lipid metabolic process)	GO:0012505(endomembrane system)
						Wt>Mp-3h and Wt=Rp-3h			A_84_P818622	-0.0258758	-0.128533	-0.823626	0.0201213	0.0520639	0.00445768	-0.520967	0.168918	-0.00753145	1.25319	1.29347	1.33378	TC292948	AT3G22600.1	NM_113159	protease inhibitor/seed storage/lipid transfer protein (LTP) family protein	GO:0006869(lipid transport)	GO:0008289(lipid binding)	GO:0031225(anchored to membrane)
						Wt>Mp-3h and Wt=Rp-3h			A_84_P541401	0.315418	0.181387	-1.24512	0.355642	0.016559	0.522481	-1.8685	0.0954837	-0.101935	0.58441	1.10443	0.956884	TC292644	AT4G18425.1	NM_117955	hypothetical protein	GO:0003674(molecular_function)	GO:0005575(cellular_component)	GO:0008150(biological_process)
						Wt>Mp-3h and Wt=Rp-3h			A_84_P814616	-0.0727754	0.126518	-0.799549	-0.0717942	0.00544001	-0.248792	-0.995455	-0.0120666	-0.00319698	-1.20564	-1.02481	0.114721	TC308670	AT4G37410.1	NM_119904	CYP81F4 (cytochrome P450, family 81, subfamily F, polypeptide 4); oxygen binding	GO:0005783(endoplasmic reticulum)	GO:0006118(electron transport)	GO:0019825(oxygen binding)
						wt>Mp-6h and Wt=Rp-6h			A_84_P22755	0.167409	0.872411	-0.429369	1.10232	-0.0556473	0.540738	-1.41735	-0.0126821	-0.0451186	0.395766	0.883004	0.967149	TC296863	AT1G26820.1	NM_102446	RNS3 (RIBONUCLEASE 3); endoribonuclease	GO:0004521(endoribonuclease activity)	GO:0007568(aging)	GO:0012505(endomembrane system)
						wt>Mp-6h and Wt=Rp-6h			A_84_P22916	0.0339789	0.216998	-0.149004	0.102275	0.0479681	0.4388	-0.702292	0.0435148	0.00551305	0.648784	0.835511	0.479301	TC292536	AT2G22190.1	NM_127787	trehalose-phosphatase	GO:0004805(trehalose-phosphatase activity)	GO:0005575(cellular_component)	GO:0005992(trehalose biosynthetic process)
						wt>Mp-6h and Wt=Rp-6h			A_84_P558829	-0.291093	-0.44819	-0.371152	-0.0946813	-0.0335303	-0.583656	-0.928798	-0.0744462	-0.0279209	0.63277	1.29826	0.503691	TC297998	AT2G29350.2	NM_201829	SAG13 (Senescence-associated gene 13); oxidoreductase	GO:0004022(alcohol dehydrogenase activity)	GO:0007568(aging)	GO:0016491(oxidoreductase activity)
						wt>Mp-6h and Wt=Rp-6h			A_84_P863159	-0.0245615	0.432321	-0.0117321	0.535155	0.0386666	0.385764	-0.707533	0.0356598	-0.0105351	0.66824	0.896701	1.03692	TC314193	AT2G36880.2	NM_001124986	MAT3 (METHIONINE ADENOSYLTRANSFERASE 3); methionine adenosyltransferase	GO:0004478(methionine adenosyltransferase activity)	GO:0005575(cellular_component)	GO:0006556(S-adenosylmethionine biosynthetic process)
						wt>Mp-6h and Wt=Rp-6h			A_84_P156615	-0.0368666	0.0890532	-0.132921	0.27675	0.0114473	-0.444203	-1.41841	0.00138219	0.0219091	1.76402	1.07485	2.28731	TC295694	AT4G12490.1	NM_117319	protease inhibitor/seed storage/lipid transfer protein (LTP) family protein	GO:0006869(lipid transport)	GO:0008289(lipid binding)	GO:0050832(defense response to fungus)
						wt>Mp-6h and Wt=Rp-6h			A_84_P21485	-0.206986	-0.0244399	-1.31922	-0.80517	0.0166412	-0.407061	-0.898127	0.0171149	-0.00854457	0.749319	1.13179	0.812457	TC293091	AT4G37150.1	NM_119878	esterase, putative	GO:0016788(hydrolase activity, acting on ester bonds)
						wt>Mp-6h and Wt=Rp-6h			A_84_P848817	0.0503252	-0.22126	-0.388835	-0.129017	0.0879051	0.440462	-0.662997	0.0959703	0.0846563	1.3479	1.81005	1.505	TC301999	AT5G10760.1	NM_121114	aspartyl protease family protein	GO:0004194(pepsin A activity)	GO:0006508(proteolysis)	GO:0012505(endomembrane system)
						wt>Mp-6h and Wt=Rp-6h			A_84_P20605	-0.0508836	-0.807239	-1.17799	-0.608466	-0.047739	-0.127325	-0.778473	-0.0170009	0.0274429	0.59641	0.775192	0.711357	TC286904	AT5G24530.1	NM_122361	oxidoreductase, 2OG-Fe(II) oxygenase family protein	GO:0005575(cellular_component)	GO:0009813(flavonoid biosynthetic process)	GO:0016706(oxidoreductase activity, acting on paired donors, with incorporation or reduction of molecular oxygen, 2-oxoglutarate as one donor, and incorporation of one atom each of oxygen into both donors)
						wt>Mp-6h and Wt=Rp-6h			A_84_P12139	0.143163	0.289529	-0.203839	0.0833104	-0.0411915	0.304785	-0.954096	-0.0686041	0.0186622	0.434382	0.657262	0.820702	TC297895	AT5G44400.1	NM_123807	FAD-binding domain-containing protein	GO:0009055(electron carrier activity)	GO:0012505(endomembrane system)
						wt>Mp-6h and Wt=Rp-6h			A_84_P23517	0.0873478	0.230283	-0.0986221	0.398239	0.0237992	0.298307	-1.00746	0.0457044	-0.0206437	0.712186	1.08347	1.17091	TC284954	AT5G52320.1	NM_124611	CYP96A4 (cytochrome P450, family 96, subfamily A, polypeptide 4); oxygen binding	GO:0006118(electron transport)	GO:0012505(endomembrane system)	GO:0019825(oxygen binding)
						wt>Mp-6h and Wt=Rp-6h			A_84_P808177	0.15104	-0.269387	-0.732266	-0.358115	-0.111775	-0.399145	-0.901618	-0.103567	-0.00168976	0.0500952	0.540658	-1.52214	TC303396	AT5G59320.1	NM_125323	LTP3 (LIPID TRANSFER PROTEIN 3); lipid binding	GO:0005618(cell wall)	GO:0008289(lipid binding)	GO:0009737(response to abscisic acid stimulus)
