# Supplementary material for: Characterization of Arabidopsis Transcriptional Responses to Different Aphid Species Reveals Genes that Contribute to Host Susceptibility and Non-host Resistance
Source: PLoS Pathog. 2015 May 20;11(5):e1004918. doi: 10.1371/journal.ppat.1004918 (PMC4439036; doi:10.1371/journal.ppat.1004918)
Supplement: S9 Table — Classification of the 874 genes according to their expression profiles among treatments (fold change ≥ 2.0, t-test p-value ≤ 0.05). The array probe number, normalized expression value (fold changes were log2), TIGR ID number, Arabidopsis thaliana accession number, the gene bank accession are given for each gene that showed a differential expression. Putative function and Gene Ontology (GO) annotations, available in the TAIR database, are also detailed for each gene. (XLSX) [file ppat.1004918.s019.xlsx]

## Sheet: Legend
Table S9. Set Arabidopsis genes up- or down-regulated or unaffected during interaction with M. persicae, M. cerasi or R. padi.
Classification of the 874 genes according to their expression profiles among treatments (fold change ≥ 2.0, t-test p-value ≤ 0.05).
The array probe number, normalized expression value (fold changes were log2), TIGR ID number, Arabidopsis thaliana accession number, the gene bank accession are given for each genes that showed a differential expression.
Putative function and Gene Ontology (GO) annotations, availabled in the TAIR database, are also detailed for each gene.
WoA<, WoA> and WoA= indicate respectivelly genes up- or down-regulated or unaffected comparing to the control without aphid (WoA) during interaction with Myzus cerasi (Mc), M. persicae (Mp) and Rhopalosiphum padi (Rp).

## Sheet: WoA<Mc-3h
WoA<Mc-3h
Type	without aphid	M. cerasi	M. persicae	R. padi	without aphid	M. cerasi	M. persicae	R. padi	without aphid	M. cerasi	M. persicae	R. padi
Time	3h				6h				24h
Systematic	log2												TIGRID	At accession	GenbankAccession	Gene function	GO
A_84_P863449	0.241232	0.937236	-1.57118	0.0221455	0.0326612	0.473553	0.602148	1.74858	-0.0561859	-1.43353	-0.18158	-1.31012	TC314293	AT2G47770.1	NM_130344	benzodiazepine receptor-related	GO:0003674(molecular_function)|GO:0008150(biological_process)|GO:0016021(integral to membrane)
A_84_P812024	-0.0973493	0.606154	0.571931	0.557911	-0.00906728	0.418696	0.605537	0.173022	-0.0234609	-1.0315	-1.48509	-1.14348	TC303802	AT1G28330.1	NM_102599	DRM1 (DORMANCY-ASSOCIATED PROTEIN 1)	GO:0003674(molecular_function)|GO:0003886(DNA (cytosine-5-)-methyltransferase activity)|GO:0005575(cellular_component)|GO:0006306(DNA methylation)|GO:0006346(methylation-dependent chromatin silencing)|GO:0008150(biological_process)|GO:0051567(histone H3-K9 methylation)
A_84_P22755	0.167409	0.872411	-0.429369	1.10232	-0.0556473	0.540738	-1.41735	-0.0126821	-0.0451186	0.395766	0.883004	0.967149	TC296863	AT1G26820.1	NM_102446	RNS3 (RIBONUCLEASE 3); endoribonuclease	GO:0004521(endoribonuclease activity)|GO:0007568(aging)|GO:0012505(endomembrane system)
A_84_P851410	-0.336693	0.372603	0.0308173	0.269558	0.0158845	0.0295593	0.506569	-0.134532	0.00919144	-0.521275	-1.36076	-0.448265	TC306364	BE039144
A_84_P515014	0.280324	0.995094	-0.270913	1.17542	0.0541702	0.793243	-0.958581	0.288202	0.0281484	0.61653	0.822268	0.983792	TC296298	AT5G48920.1	NM_124269	hydroxyproline-rich glycoprotein family protein	GO:0003674(molecular_function)|GO:0008150(biological_process)
A_84_P812032	-0.134507	0.583596	0.665314	0.546268	-0.0454494	0.366204	0.67156	0.184507	-0.0147223	-1.01289	-1.46332	-1.16128	TC303802	AT1G28330.1	NM_102599	DRM1 (DORMANCY-ASSOCIATED PROTEIN 1)	GO:0003674(molecular_function)|GO:0003886(DNA (cytosine-5-)-methyltransferase activity)|GO:0005575(cellular_component)|GO:0006306(DNA methylation)|GO:0006346(methylation-dependent chromatin silencing)|GO:0008150(biological_process)|GO:0051567(histone H3-K9 methylation)
A_84_P144819	-0.0887482	0.631789	0.607013	0.266799	0.0429863	-0.255775	0.657323	-0.37466	0.0720466	-0.778238	-1.50267	-0.984417		AT3G29370.1	NM_113862	hypothetical protein	GO:0003674(molecular_function)|GO:0008150(biological_process)
A_84_P19239	-0.0259644	0.705875	1.27813	0.975756	-0.00681212	0.678085	0.665642	0.426974	-0.00660188	-0.92725	-1.20506	-1.23773	TC295757	AT1G44830.1	NM_103564	AP2 domain-containing transcription factor TINY, putative	GO:0003677(DNA binding)|GO:0003700(transcription factor activity)|GO:0005634(nucleus)|GO:0006355(regulation of transcription, DNA-dependent)
A_84_P758588	0.270132	1.00204	1.31109	0.936241	-0.0343102	2.24932	0.404319	1.76924	0.0164986	2.66348	3.35462	1.9015	TC305259	AT2G30766.1	NM_001124947	hypothetical protein
A_84_P757973	-0.0112613	0.745147	0.695416	1.12673	-0.0290193	1.45841	0.210108	1.33864	0.00531273	0.81463	0.936229	1.13048	TC302129	AT2G44578.1	NM_001084589	protein binding / zinc ion binding	GO:0005515(protein binding)|GO:0008270(zinc ion binding)|GO:0012505(endomembrane system)
A_84_P560912	-0.303899	0.460862	0.525776	0.493106	0.00385993	-0.287459	-0.0255893	-0.128251	-0.00691515	-1.24692	-1.66049	-1.02514	TC298928	AT4G24275.1	NM_148371	hypothetical protein	GO:0003674(molecular_function)|GO:0005575(cellular_component)|GO:0006950(response to stress)
A_84_P230289	-0.205598	0.560261	0.327999	0.464666	0.0035612	-0.13323	0.259805	-0.451877	-0.00976263	-0.919419	-1.03293	-0.971135	TC305747	AT2G44080.1	NM_180078	ARL (ARGOS-LIKE)	GO:0003674(molecular_function)|GO:0005622(intracellular)|GO:0009741(response to brassinosteroid stimulus)|GO:0009742(brassinosteroid mediated signaling)|GO:0016049(cell growth)|GO:0035265(organ growth)
A_84_P164883	-0.00188868	0.777234	0.971728	0.801307	-0.000601236	0.521505	0.795097	0.512059	0.007529	-1.76173	-0.790184	-1.26377	TC291511	AT5G42900.1	NM_180790	hypothetical protein	GO:0003674(molecular_function)|GO:0005575(cellular_component)|GO:0008150(biological_process)
A_84_P812038	-0.230881	0.557727	0.626256	0.543844	0.00268893	0.403623	0.645694	0.277021	-0.030776	-0.943795	-1.57669	-1.03596	TC305987	AT1G28330.2	NM_179389	DRM1 (DORMANCY-ASSOCIATED PROTEIN 1)	GO:0003674(molecular_function)|GO:0003886(DNA (cytosine-5-)-methyltransferase activity)|GO:0005575(cellular_component)|GO:0006306(DNA methylation)|GO:0006346(methylation-dependent chromatin silencing)|GO:0008150(biological_process)|GO:0051567(histone H3-K9 methylation)
A_84_P12315	-0.101561	0.694699	0.793971	0.689989	-0.0391996	-0.147154	0.853642	0.0146606	0.00613615	-0.730856	-0.731821	-0.675134	TC304902	AT1G64660.1	NM_105141	ATMGL; catalytic/ methionine gamma-lyase	GO:0003824(catalytic activity)|GO:0005829(cytosol)|GO:0006520(amino acid metabolic process)|GO:0018826(methionine gamma-lyase activity)|GO:0019458(methionine catabolic process via 2-oxobutanoate)
A_84_P15764	-0.152224	0.646723	0.807999	0.70683	-0.0211309	0.262061	0.268299	0.27965	-0.0212199	-0.25063	-0.689906	-0.339985	TC313856	AT4G32460.1	NM_202932	hypothetical protein	GO:0003674(molecular_function)|GO:0008150(biological_process)|GO:0012505(endomembrane system)
A_84_P704033	0.0269715	0.832042	0.12373	0.42677	-0.00644217	0.365577	-0.396435	0.0801828	-0.000335268	-0.041575	0.4467	0.502728	TC301800	AT1G11185.1	NR_022067	misc_RNA
A_84_P515420	-0.0211497	0.785947	0.532293	0.875512	0.0443912	0.206022	-0.477608	0.138573	0.0278826	-0.0692158	0.134747	0.320301	TC299101	AT2G32280.1	NM_128787	hypothetical protein	GO:0003674(molecular_function)|GO:0008150(biological_process)|GO:0012505(endomembrane system)
A_84_P750624	-0.00142097	0.82261	-0.0678379	0.625043	-0.0402872	0.0675566	-0.798355	0.104899	-0.0473193	-0.0757729	0.0528218	0.590758	TC307700	AT1G11580.1	NM_101031	ATPMEPCRA; pectinesterase	GO:0009505(plant-type cell wall)|GO:0030599(pectinesterase activity)|GO:0042545(cell wall modification)
A_84_P860087	0.0434809	0.872527	1.25932	1.14929	-0.0185827	0.689602	0.810439	0.672613	0.00127189	-0.144607	-0.256411	0.0731047	TC312566	AT1G27020.1	NM_102464	hypothetical protein	GO:0003674(molecular_function)|GO:0005575(cellular_component)|GO:0008150(biological_process)
A_84_P159845	-0.107347	0.725439	0.447884	0.518743	-0.0305385	0.432747	0.252472	0.295298	-0.0547219	-0.516874	-0.598923	-0.144815	TC285374	AT3G28290.1	NM_113748	AT14A	GO:0003674(molecular_function)|GO:0005575(cellular_component)|GO:0008150(biological_process)
A_84_P17864	0.0176613	0.854165	0.0273426	0.139731	-0.0117417	0.0716509	-1.22777	-0.583678	-0.00262556	-0.799194	-0.368141	0.0506536	TC283458	AT5G58860.1	NM_125276	CYP86A1 (cytochrome P450, family 86, subfamily A, polypeptide 1); oxygen binding	GO:0006631(fatty acid metabolic process)|GO:0008393(fatty acid (omega-1)-hydroxylase activity)|GO:0010345(suberin biosynthetic process)|GO:0012505(endomembrane system)|GO:0019825(oxygen binding)
A_84_P286080	0.0662462	0.906697	0.28413	0.180341	0.0364735	0.294141	-1.23145	-0.653733	-0.0268354	-1.05676	-0.536346	-0.0292244		AT5G19410.1	NM_121946	ABC transporter family protein	GO:0009507(chloroplast)|GO:0042626(ATPase activity, coupled to transmembrane movement of substances)
A_84_P20163	-0.214845	0.631142	0.817936	0.833165	0.000915669	0.610577	0.819005	0.690369	-0.0460801	-0.42409	-0.762496	-0.431963	TC304175	AT2G38400.1	NM_129396	AGT3 (ALANINE:GLYOXYLATE AMINOTRANSFERASE 3); alanine-glyoxylate transaminase	GO:0008453(alanine-glyoxylate transaminase activity)
A_84_P12605	-0.347178	0.508197	0.19797	0.537955	-0.0194298	-1.04386	-0.511375	-0.830873	0.0368595	-0.711525	-0.990193	-0.531732	NP454671	AT2G18010.1	NM_127357	auxin-responsive family protein	GO:0003674(molecular_function)|GO:0009733(response to auxin stimulus)
A_84_P805118	-0.325871	0.531056	0.0777719	0.46937	0.00510306	-0.0371423	0.303934	-0.19686	-0.00490973	-0.50254	-1.33976	-0.346708	TC311392	AT3G15450.3	NM_001035625	hypothetical protein	GO:0003674(molecular_function)
A_84_P819063	-0.053584	0.805802	0.757529	0.822176	-0.00943641	0.82399	0.921145	0.537021	-0.0565766	-0.441257	-0.246811	-0.183713	TC307065	AT3G46640.1	NM_114531	PCL1 (PHYTOCLOCK 1); DNA binding	GO:0003677(DNA binding)|GO:0003700(transcription factor activity)|GO:0007623(circadian rhythm)|GO:0045449(regulation of transcription)
A_84_P96276	0.0101846	0.870711	1.04086	0.893898	-0.00491497	1.03679	0.634081	0.803327	-0.0258125	-0.215346	0.104383	-0.1971	TC285113	AT5G60100.1	NM_125403	APRR3 (PSEUDO-RESPONSE REGULATOR 3); transcription regulator	GO:0000156(two-component response regulator activity)|GO:0007623(circadian rhythm)|GO:0016310(phosphorylation)|GO:0030528(transcription regulator activity)|GO:0032091(negative regulation of protein binding)|GO:0042752(regulation of circadian rhythm)
A_84_P23284	0.216384	1.07925	1.03485	1.71251	0.0334749	0.265882	0.228785	0.750197	-0.0357848	-1.1125	-0.619764	-0.627737	TC283380	AT4G21680.1	NM_118288	proton-dependent oligopeptide transport (POT) family protein	GO:0005215(transporter activity)|GO:0006857(oligopeptide transport)|GO:0016020(membrane)
A_84_P524502	-0.309861	0.557412	0.339844	0.456196	-0.0625506	-0.81288	-0.492053	-0.936463	0.0147058	-1.05189	-1.37455	-0.947759	TC293715	AT3G59900.1	NM_115853	hypothetical protein	GO:0003674(molecular_function)|GO:0005622(intracellular)|GO:0008150(biological_process)
A_84_P845406	-0.177529	0.690627	0.400592	0.884927	0.0698536	-0.181618	0.469748	-0.343695	-0.110104	-1.02875	-1.79549	-0.725567	TC290715	AT3G47340.1	NM_114602	ASN1 (DARK INDUCIBLE 6)	GO:0004066(asparagine synthase (glutamine-hydrolyzing) activity)|GO:0009063(amino acid catabolic process)|GO:0009416(response to light stimulus)|GO:0009646(response to absence of light)|GO:0009744(response to sucrose stimulus)|GO:0043617(cellular response to sucrose starvation)
A_84_P255380	-0.215508	0.659985	0.297481	0.2218	-0.0561941	-0.165598	0.0282522	0.473093	0.0122128	-0.767408	-0.315022	-0.7313	TC294250	AT1G16850.1	NM_101546	hypothetical protein	GO:0003674(molecular_function)|GO:0009651(response to salt stress)|GO:0012505(endomembrane system)
A_84_P539392	-0.0128361	0.874992	0.963865	0.92613	0.005578	0.794909	0.663888	0.5279	0.0339887	-0.247577	-0.170831	-0.426042	TC301754	AT2G38465.1	NM_129403	hypothetical protein	GO:0003674(molecular_function)|GO:0005575(cellular_component)|GO:0008150(biological_process)
A_84_P574406	0.0210471	0.924513	0.652927	0.877958	-0.00136808	0.586668	0.147496	0.196985	-0.000631551	-0.213596	-0.367053	-0.294762	TC302828	AT5G39240.1	NM_123286	hypothetical protein	GO:0008150(biological_process)
A_84_P17974	-0.235673	0.671578	-0.426355	0.19614	-0.0119349	-0.451186	-0.602284	0.148006	0.0473199	-0.660851	-0.242396	-0.933521	NP033988	AT1G62570.1	NM_104935	flavin-containing monooxygenase family protein / FMO family protein	GO:0004497(monooxygenase activity)|GO:0006118(electron transport)
A_84_P136115	-0.18511	0.724211	1.46293	1.23224	0.00826733	0.873214	1.25953	1.00816	0.061806	-0.59263	-0.984702	-0.363855	TC295977	AT1G75750.1	NM_106225	GASA1 (GAST1 PROTEIN HOMOLOG 1)	GO:0003674(molecular_function)|GO:0009505(plant-type cell wall)|GO:0009737(response to abscisic acid stimulus)|GO:0009739(response to gibberellin stimulus)|GO:0009741(response to brassinosteroid stimulus)|GO:0009826(unidimensional cell growth)
A_84_P292144	-0.0258256	0.888205	1.11817	1.44289	0.00577181	0.50941	1.05027	0.804025	-0.0175223	-0.253181	-0.209049	0.275232	TC305936	AT3G23550.1	NM_113258	MATE efflux family protein	GO:0005215(transporter activity)|GO:0006855(multidrug transport)|GO:0015297(antiporter activity)|GO:0016020(membrane)
A_84_P859689	-0.200279	0.717513	1.4629	1.24973	0.0234624	0.892851	1.23407	1.03758	-0.0123087	-0.652766	-1.10269	-0.460226	TC312327	AT1G75750.1	NM_106225	GASA1 (GAST1 PROTEIN HOMOLOG 1)	GO:0003674(molecular_function)|GO:0009505(plant-type cell wall)|GO:0009737(response to abscisic acid stimulus)|GO:0009739(response to gibberellin stimulus)|GO:0009741(response to brassinosteroid stimulus)|GO:0009826(unidimensional cell growth)
A_84_P10874	-0.321225	0.609019	-0.0804652	0.540119	0.0094706	-0.445184	-0.244707	0.193255	0.00528506	-0.734759	-0.261485	-0.962407	TC293106	AT3G50970.1	NM_114957	LTI30 (LOW TEMPERATURE-INDUCED 30)	GO:0003674(molecular_function)|GO:0006950(response to stress)|GO:0009409(response to cold)|GO:0009414(response to water deprivation)|GO:0009415(response to water)|GO:0009631(cold acclimation)|GO:0009737(response to abscisic acid stimulus)|GO:0016020(membrane)
A_84_P249125	-0.0560592	0.886637	0.422789	0.61118	0.0117949	0.378183	0.550799	0.576441	-0.0124158	-0.597785	-0.279104	-0.365644	TC306879	AT1G68500.1	NM_105521	hypothetical protein	GO:0005575(cellular_component)
A_84_P863235	-0.244064	0.71452	0.681283	1.20254	-0.0295594	0.555085	1.33891	0.684765	0.0476504	-0.359297	-1.35798	-0.329793	TC314219	BP667596
A_84_P22055	-0.0301011	0.931839	-0.13066	0.418152	0.0200952	0.132781	-1.05005	-0.14024	-0.0464833	-0.245271	0.129692	0.63865	TC299729	AT2G38380.1	NM_129394	peroxidase 22 (PER22) (P22) (PRXEA) / basic peroxidase E	GO:0004601(peroxidase activity)|GO:0006118(electron transport)|GO:0006979(response to oxidative stress)|GO:0012505(endomembrane system)
A_84_P18796	-0.161472	0.809152	0.710929	1.08367	-0.00523926	0.113324	-0.271406	-0.134886	0.0408247	0.241899	0.25936	0.26774	TC301779	AT5G54960.1	NM_124878	PDC2 (PYRUVATE DECARBOXYLASE-2); pyruvate decarboxylase	GO:0001666(response to hypoxia)|GO:0004737(pyruvate decarboxylase activity)|GO:0005575(cellular_component)
A_84_P812554	-0.242636	0.751839	0.840942	1.20348	-0.0581076	0.481083	1.19405	0.520198	-0.00187904	-0.431119	-1.37035	-0.263198		TA29648_3702
A_84_P811729	-0.114352	0.892942	0.676662	0.928821	-0.0918255	0.0844289	0.117092	-0.158709	0.035408	-0.586007	-1.06315	-0.912882	TC296927	AT2G33830.1	NM_128942	dormancy/auxin associated family protein	GO:0005575(cellular_component)|GO:0008150(biological_process)
A_84_P14874	-0.0682871	0.939556	0.540301	0.579596	0.0740738	0.142374	0.0961832	-0.0929867	0.00471276	-0.75271	-1.08041	-0.647258	TC291922	AT1G62770.1	NM_104955	invertase/pectin methylesterase inhibitor family protein	GO:0008150(biological_process)|GO:0012505(endomembrane system)|GO:0046910(pectinesterase inhibitor activity)
A_84_P127071	-0.249587	0.760034	-1.11755	0.36608	0.0704033	0.456747	1.77004	1.91939	0.0268652	-1.66034	0.0808267	-1.525	TC298057	AT5G05220.1	NM_120604	hypothetical protein	GO:0003674(molecular_function)|GO:0008150(biological_process)
A_84_P22400	-0.411909	0.6363	0.789493	1.03903	-0.015832	0.504268	1.24529	0.601398	-0.00015778	-0.438661	-1.37475	-0.313048	TC306897	AT4G35770.1	NM_119743	SEN1 (DARK INDUCIBLE 1)	GO:0003674(molecular_function)|GO:0006979(response to oxidative stress)|GO:0007568(aging)|GO:0009416(response to light stimulus)|GO:0009507(chloroplast)|GO:0009611(response to wounding)|GO:0009744(response to sucrose stimulus)|GO:0009753(response to jasmonic acid stimulus)
A_84_P109472	0.0678617	1.1219	-1.43942	0.048151	-0.012785	0.527187	0.92526	1.91265	0.0276808	-1.60114	-0.122708	-1.54889	TC311639	AT2G47770.1	NM_130344	benzodiazepine receptor-related	GO:0003674(molecular_function)|GO:0008150(biological_process)|GO:0016021(integral to membrane)
A_84_P536936	0.0509914	1.11125	0.282676	0.634535	0.124513	0.109157	0.521691	1.16538	-0.0594207	0.381609	1.1492	-1.28873	TC310597	AT4G01985.1	NM_202770	hypothetical protein	GO:0003674(molecular_function)|GO:0008150(biological_process)|GO:0012505(endomembrane system)
A_84_P546443	-0.0376833	1.0291	1.28967	1.25034	-0.0491268	0.732596	0.817311	0.802117	0.00460515	-0.549479	-0.170995	-0.469722	TC299731	AT2G28085.1	NM_128368	auxin-responsive family protein	GO:0003674(molecular_function)|GO:0005575(cellular_component)|GO:0009733(response to auxin stimulus)
A_84_P100456	0.0947693	1.18479	1.07443	1.14307	-0.0105009	0.917829	0.634597	0.577988	0.0201679	-0.465058	0.159921	0.0310252	TC292275	AT1G07050.1	NM_100579	CONSTANS-like protein-related	GO:0003674(molecular_function)|GO:0005575(cellular_component)|GO:0008150(biological_process)
A_84_P20323	-0.158168	0.937692	0.902927	1.42442	-0.0382096	0.746322	1.1162	0.894639	-0.0348887	-0.255371	-0.538704	0.125659	TC289098	AT3G49620.1	NM_114822	DIN11 (DARK INDUCIBLE 11); oxidoreductase	GO:0007568(aging)|GO:0009267(cellular response to starvation)|GO:0009416(response to light stimulus)|GO:0009744(response to sucrose stimulus)|GO:0016491(oxidoreductase activity)
A_84_P857167	-0.233138	0.903994	1.00165	1.40181	-0.0795427	0.386028	1.12812	0.365545	-0.0117111	-0.480124	-1.36745	-0.301375	TC310880	AT4G35770.1	NM_119743	SEN1 (DARK INDUCIBLE 1)	GO:0003674(molecular_function)|GO:0006979(response to oxidative stress)|GO:0007568(aging)|GO:0009416(response to light stimulus)|GO:0009507(chloroplast)|GO:0009611(response to wounding)|GO:0009744(response to sucrose stimulus)|GO:0009753(response to jasmonic acid stimulus)
A_84_P800952	-0.074461	1.06952	0.800901	1.41715	0.0533794	0.242069	-0.509736	-0.134752	-0.0517024	0.273797	0.328534	0.450194	TC301779	AT5G54960.1	NM_124878	PDC2 (PYRUVATE DECARBOXYLASE-2); pyruvate decarboxylase	GO:0001666(response to hypoxia)|GO:0004737(pyruvate decarboxylase activity)|GO:0005575(cellular_component)
A_84_P14848	-0.00922161	1.14075	1.98014	1.91256	-0.0849971	-0.592524	0.215792	0.114895	-0.0243668	-0.782676	-1.327	0.454007	TC291718	AT4G14130.1	NM_117490	XTR7 (XYLOGLUCAN ENDOTRANSGLYCOSYLASE 7); hydrolase, acting on glycosyl bonds	GO:0005618(cell wall)|GO:0005975(carbohydrate metabolic process)|GO:0006073(glucan metabolic process)|GO:0006499(N-terminal protein myristoylation)|GO:0012505(endomembrane system)|GO:0016798(hydrolase activity, acting on glycosyl bonds)|GO:0048046(apoplast)
A_84_P721670	-0.13974	1.03972	0.766046	0.857789	-0.0504146	0.311281	1.146	0.0836709	-0.0135872	-0.373236	-1.14984	-0.855705	TC303313	BU917423
A_84_P10039	-0.187147	1.01087	1.48006	1.36344	-0.00553848	0.564235	0.723626	0.549998	-0.00774334	-0.305724	-0.426997	-0.071931	TC303950	AT1G27020.1	NM_102464	hypothetical protein	GO:0003674(molecular_function)|GO:0005575(cellular_component)|GO:0008150(biological_process)
A_84_P14226	-0.217362	1.02526	1.47336	1.56385	0.0150772	0.548288	1.3292	0.774977	-0.0167652	-0.387847	-0.746788	-0.075348	TC308032	AT1G10070.1	NM_001035939	ATBCAT-2; branched-chain-amino-acid transaminase/ catalytic	GO:0003824(catalytic activity)|GO:0004084(branched-chain-amino-acid transaminase activity)|GO:0008152(metabolic process)|GO:0009081(branched chain family amino acid metabolic process)|GO:0009507(chloroplast)
A_84_P523896	-0.357116	0.891314	0.649926	0.702879	0.0100989	0.194576	0.322309	0.134731	0.00762614	-1.15163	-1.31603	-1.09045	TC296074	AT5G50335.1	NM_124414	hypothetical protein	GO:0003674(molecular_function)|GO:0005575(cellular_component)|GO:0008150(biological_process)
A_84_P843011	0.0791735	1.33682	1.17341	1.29825	0.0181725	0.967248	0.600864	0.588089	-0.02987	-0.484745	0.120958	-0.0170187	NP303026	AT1G07050.1	NM_100579	CONSTANS-like protein-related	GO:0003674(molecular_function)|GO:0005575(cellular_component)|GO:0008150(biological_process)
A_84_P65264	-0.228626	1.04261	1.18763	1.41603	-0.0367585	0.663918	1.05779	0.905392	-0.0230699	-0.5675	-0.38932	-0.0637641	TC290044	AT3G15356.1	NM_148726	legume lectin family protein	GO:0008150(biological_process)|GO:0012505(endomembrane system)|GO:0030246(carbohydrate binding)
A_84_P14274	-0.187554	1.08821	-2.17538	0.709487	-0.0219094	0.428927	1.05444	1.36196	-0.0142419	-0.358652	0.736392	-0.269989	TC292541	AT1G52690.1	NM_202280	late embryogenesis abundant protein, putative / LEA protein, putative	GO:0003674(molecular_function)|GO:0005575(cellular_component)|GO:0009793(embryonic development ending in seed dormancy)
A_84_P284310	0.106825	1.394	0.933576	-0.0122012	-0.0470501	1.07204	0.965029	0.0459579	0.0350546	0.927188	1.48239	0.813303	TC293112	AT2G01520.1	NM_126213	MLP328 (MLP-LIKE PROTEIN 328)	GO:0003674(molecular_function)|GO:0005575(cellular_component)|GO:0006952(defense response)|GO:0009607(response to biotic stimulus)
A_84_P804259	-0.0423645	1.25426	1.03596	1.37907	-0.0384763	0.307523	0.0826241	0.206513	-0.00980335	-0.121871	-0.687839	0.506714	TC296562	DR339542
A_84_P20176	-0.0596521	1.28432	1.04334	1.42905	-0.0379773	0.278328	0.0925327	0.185197	-0.00202347	-0.191491	-0.718565	0.46577	TC296562	AT2G44790.1	NM_130043	UCC2 (UCLACYANIN 2); copper ion binding	GO:0005507(copper ion binding)|GO:0006118(electron transport)|GO:0031225(anchored to membrane)
A_84_P18821	-0.00979358	1.33802	1.72361	2.0034	-0.0168169	1.47537	1.53943	1.64091	0.028508	-0.330386	-0.223252	0.164036	TC286307	AT5G61160.1	NM_125509	AACT1 (ANTHOCYANIN 5-AROMATIC ACYLTRANSFERASE 1); transferase	GO:0005575(cellular_component)|GO:0008150(biological_process)|GO:0016740(transferase activity)
A_84_P555590	-0.0147208	1.5403	-0.233866	0.456102	-0.043077	0.134612	-0.39964	0.133504	0.0613368	-0.760592	-0.24915	0.193105	TC297376	AT4G22212.1	NM_118344	hypothetical protein	GO:0006952(defense response)|GO:0012505(endomembrane system)
A_84_P211628	-0.00355275	1.57942	1.29745	1.4571	-0.0251306	1.26607	0.916174	0.97139	0.0136872	-0.565768	0.231539	-0.484246	TC296319	AT2G40080.1	NM_129566	ELF4 (EARLY FLOWERING 4)	GO:0003674(molecular_function)|GO:0005634(nucleus)|GO:0009648(photoperiodism)|GO:0009909(regulation of flower development)|GO:0010017(red or far red light signaling pathway)|GO:0010114(response to red light)|GO:0042753(positive regulation of circadian rhythm)
A_84_P68884	-0.0121742	1.57956	0.844249	1.90173	-0.0365924	1.60684	0.353787	1.41089	0.00638417	2.4506	2.21061	2.61975	TC294840	AT4G21840.1	NM_118304	methionine sulfoxide reductase domain-containing protein / SelR domain-containing protein	GO:0005575(cellular_component)|GO:0008113(peptide-methionine-(S)-S-oxide reductase activity)|GO:0008150(biological_process)
A_84_P852577	0.0391735	1.64101	1.31775	1.54296	-0.00502883	1.32456	0.914515	0.990314	-0.0194973	-0.587035	0.180509	-0.560209	TC307658	TC307658			GO:0009648(photoperiodism)|GO:0009909(regulation of flower development)|GO:0042753(positive regulation of circadian rhythm)
A_84_P19375	-0.0838733	1.63282	1.02282	1.6037	0.0118744	0.439833	-0.0805407	0.294781	0.00494904	-0.266735	-0.475123	0.217063	TC286780	AT3G49110.1	NM_114770	ATPCA/ATPRX33/PRX33/PRXCA (PEROXIDASE 33); peroxidase	GO:0004601(peroxidase activity)|GO:0006800(oxygen and reactive oxygen species metabolic process)|GO:0009416(response to light stimulus)|GO:0009505(plant-type cell wall)|GO:0009826(unidimensional cell growth)|GO:0042742(defense response to bacterium)|GO:0050832(defense response to fungus)
A_84_P159795	0.0481692	1.84761	1.53223	1.70102	0.0004594	0.67388	0.934696	0.733266	-0.00216683	-1.04728	-0.847275	-0.673243	TC304453	AT1G19530.1	NM_101811	hypothetical protein	GO:0003674(molecular_function)|GO:0005575(cellular_component)|GO:0006499(N-terminal protein myristoylation)
A_84_P14045	0.127473	2.31882	1.7714	2.09596	-0.0608924	0.810991	0.0230206	0.49584	-0.0332497	1.93379	0.89161	2.81837	TC287521	AT5G48430.1	NM_124218	aspartic-type endopeptidase/ pepsin A	GO:0004190(aspartic-type endopeptidase activity)|GO:0004194(pepsin A activity)|GO:0006508(proteolysis)|GO:0012505(endomembrane system)

## Sheet: WoA<Mp-3h
WoA<Mp-3h
Type	without aphid	M. cerasi	M. persicae	R. padi	without aphid	M. cerasi	M. persicae	R. padi	without aphid	M. cerasi	M. persicae	R. padi
Time	3h				6h				24h
Systematic	log2												TIGRID	At accession	GenbankAccession	Gene function	GO
A_84_P790164	0.0177776	0.255285	0.712592	0.718072	0.064506	-0.0929038	1.27316	-0.21857	-0.00342196	-0.929231	-1.05711	0.0536001	TC308748	AT5G41080.2	NM_203136	glycerophosphoryl diester phosphodiesterase family protein	GO:0006071(glycerol metabolic process)|GO:0008889(glycerophosphodiester phosphodiesterase activity)
A_84_P144819	-0.0887482	0.631789	0.607013	0.266799	0.0429863	-0.255775	0.657323	-0.37466	0.0720466	-0.778238	-1.50267	-0.984417		AT3G29370.1	NM_113862	hypothetical protein	GO:0003674(molecular_function)|GO:0008150(biological_process)
A_84_P56650	0.0513801	0.173188	0.751549	0.652713	-0.000451126	-0.312269	1.32668	-0.307063	-0.0163911	-0.937438	-0.951632	-0.112091	TC296387	AT5G41080.1	NM_203136	glycerophosphoryl diester phosphodiesterase family protein	GO:0006071(glycerol metabolic process)|GO:0008889(glycerophosphodiester phosphodiesterase activity)
A_84_P757973	-0.0112613	0.745147	0.695416	1.12673	-0.0290193	1.45841	0.210108	1.33864	0.00531273	0.81463	0.936229	1.13048	TC302129	AT2G44578.1	NM_001084589	protein binding / zinc ion binding	GO:0005515(protein binding)|GO:0008270(zinc ion binding)|GO:0012505(endomembrane system)
A_84_P823733	-0.0743774	0.0777256	0.645165	0.198157	0.0357547	1.60462	0.700205	0.95242	-0.020779	0.608089	1.02124	0.280982	TC289121	AT3G28340.1	NM_113753	GATL10 (Galacturonosyltransferase-like 10); polygalacturonate 4-alpha-galacturonosyltransferase/ transferase, transferring hexosyl groups	GO:0012505(endomembrane system)|GO:0016051(carbohydrate biosynthetic process)|GO:0016758(transferase activity, transferring hexosyl groups)|GO:0047262(polygalacturonate 4-alpha-galacturonosyltransferase activity)
A_84_P535484	-0.123532	-0.0765077	0.598049	0.299932	-0.0182375	0.0632053	0.075327	-0.117841	-0.0491051	-1.43115	-1.77532	-1.57839	TC310807	AT1G03010.1	NM_100182	phototropic-responsive NPH3 family protein	GO:0004871(signal transducer activity)|GO:0009416(response to light stimulus)
A_84_P283660	-0.250179	0.099056	0.475647	0.370972	-0.046895	-0.496085	-0.0609928	-0.515426	0.00161904	-0.750713	-1.11171	-0.802866	TC287684	AT2G42040.1	NM_129767	hypothetical protein	GO:0003674(molecular_function)|GO:0008150(biological_process)
A_84_P18985	-0.0182593	0.343312	0.709313	0.592578	-0.0146545	-0.00290639	0.4416	-0.00768026	0.0249442	-1.15001	-1.69483	-0.837273	NP035802	AT1G11740.1	NM_101046	ankyrin repeat family protein	GO:0005515(protein binding)|GO:0005575(cellular_component)|GO:0008150(biological_process)
A_84_P11250	0.0445882	0.271007	0.786872	0.365704	-0.0168627	0.472957	0.735692	0.624165	-0.0161892	-1.76438	-1.30916	-1.36089	TC309869	AT5G59570.1	NM_125349	myb family transcription factor	GO:0003677(DNA binding)|GO:0003700(transcription factor activity)|GO:0045449(regulation of transcription)
A_84_P13577	-0.105257	0.227022	0.641478	0.399329	-0.0140487	0.131478	0.107861	-0.0132134	-0.0014393	-0.592768	-0.991644	-0.555158	TC298242	AT1G36940.1	NM_103350	hypothetical protein	GO:0003674(molecular_function)|GO:0005575(cellular_component)|GO:0008150(biological_process)
A_84_P10579	0.0433268	0.323235	0.796077	0.233015	-0.0172747	0.258086	0.0834118	0.0404306	-0.0377472	-1.06267	-0.969759	-1.03858	TC296360	AT1G78970.1	NM_106546	LUP1 (LUPEOL SYNTHASE 1); lupeol synthase	GO:0005575(cellular_component)|GO:0019745(pentacyclic triterpenoid biosynthetic process)|GO:0042299(lupeol synthase activity)|GO:0042300(beta-amyrin synthase activity)
A_84_P540524	-0.0553483	0.434038	0.697454	0.515487	-0.0412618	0.68673	0.536978	0.559205	0.00158896	-0.257294	-0.26141	-0.264509	TC288405	AT4G17140.1	NM_117818	hypothetical protein	GO:0003674(molecular_function)|GO:0005575(cellular_component)|GO:0008150(biological_process)
A_84_P21807	-0.0704878	0.347833	0.684062	0.584733	-0.0660096	0.00369404	0.378559	-0.131234	0.00255404	-0.981942	-1.3373	-1.10309	TC295592	AT1G22740.1	NM_102121	RAB7 (Ras-related protein 7); GTP binding	GO:0005525(GTP binding)|GO:0005622(intracellular)|GO:0006355(regulation of transcription, DNA-dependent)|GO:0006886(intracellular protein transport)|GO:0006913(nucleocytoplasmic transport)|GO:0007165(signal transduction)|GO:0007264(small GTPase mediated signal transduction)|GO:0015031(protein transport)
A_84_P815671	0.0127517	0.553235	0.772266	0.712748	0.0176245	0.131172	0.428168	0.0596758	-0.00552745	-0.880963	-0.588653	-0.761392	TC288175	AT3G59350.3	NM_001035816	serine/threonine protein kinase, putative	GO:0005575(cellular_component)|GO:0006468(protein amino acid phosphorylation)|GO:0016301(kinase activity)
A_84_P16735	-0.0358389	0.107482	0.734169	0.531999	-0.00709009	0.371434	1.13469	0.575047	-0.0284806	-1.79108	-1.89373	-1.41869	TC293780	AT4G39070.1	NM_120067	zinc finger (B-box type) family protein	GO:0003700(transcription factor activity)|GO:0005622(intracellular)|GO:0008270(zinc ion binding)|GO:0045449(regulation of transcription)
A_84_P167453	-0.0595772	0.167929	0.715562	0.127559	-0.0238351	0.342654	-0.264805	0.167428	-0.0628597	-0.503647	-0.457597	-0.652133	TC309025	AT5G22460.1	NM_180724	esterase/lipase/thioesterase family protein	GO:0003824(catalytic activity)|GO:0008150(biological_process)|GO:0009505(plant-type cell wall)
A_84_P13746	-0.0263888	0.599303	0.751273	0.772671	0.0249392	0.19715	0.341763	0.0515939	0.0176926	-0.733742	-0.519422	-0.596275	TC288175	AT3G59350.1	NM_001035816	serine/threonine protein kinase, putative	GO:0005575(cellular_component)|GO:0006468(protein amino acid phosphorylation)|GO:0016301(kinase activity)
A_84_P13126	-0.0861359	0.303093	0.691796	0.443571	-0.00459104	0.484121	0.334831	0.31342	0.00169448	-0.631988	-0.582063	-0.675648	TC295112	AT5G56040.1	NM_124986	leucine-rich repeat protein kinase, putative	GO:0004674(protein serine/threonine kinase activity)|GO:0005524(ATP binding)|GO:0006468(protein amino acid phosphorylation)|GO:0007169(transmembrane receptor protein tyrosine kinase signaling pathway)|GO:0012505(endomembrane system)|GO:0016301(kinase activity)
A_84_P554567	-0.169876	0.173149	0.616956	0.197061	-0.0148284	1.85832	0.819253	1.04979	0.0191905	1.18348	1.57971	0.675922		AT3G28340.1	NM_113753	GATL10 (Galacturonosyltransferase-like 10); polygalacturonate 4-alpha-galacturonosyltransferase/ transferase, transferring hexosyl groups	GO:0012505(endomembrane system)|GO:0016051(carbohydrate biosynthetic process)|GO:0016758(transferase activity, transferring hexosyl groups)|GO:0047262(polygalacturonate 4-alpha-galacturonosyltransferase activity)
A_84_P811729	-0.114352	0.892942	0.676662	0.928821	-0.0918255	0.0844289	0.117092	-0.158709	0.035408	-0.586007	-1.06315	-0.912882	TC296927	AT2G33830.1	NM_128942	dormancy/auxin associated family protein	GO:0005575(cellular_component)|GO:0008150(biological_process)
A_84_P612892	0.167673	0.82209	0.962371	0.982456	0.0368642	0.686086	0.60291	0.477507	-0.0096646	-0.901205	-0.262622	-0.554745	TC306347	AT1G17665.1	NM_101629	hypothetical protein	GO:0003674(molecular_function)|GO:0008150(biological_process)|GO:0012505(endomembrane system)
A_84_P812032	-0.134507	0.583596	0.665314	0.546268	-0.0454494	0.366204	0.67156	0.184507	-0.0147223	-1.01289	-1.46332	-1.16128	TC303802	AT1G28330.1	NM_102599	DRM1 (DORMANCY-ASSOCIATED PROTEIN 1)	GO:0003674(molecular_function)|GO:0003886(DNA (cytosine-5-)-methyltransferase activity)|GO:0005575(cellular_component)|GO:0006306(DNA methylation)|GO:0006346(methylation-dependent chromatin silencing)|GO:0008150(biological_process)|GO:0051567(histone H3-K9 methylation)
A_84_P265780	0.149868	-0.114921	0.95737	0.0481381	-0.00508752	0.775881	0.345798	0.54213	-0.0297141	-2.54058	-1.31829	-1.68282	TC286455	AT5G15840.1	NM_001036810	CO (CONSTANS); transcription factor/ zinc ion binding	GO:0003700(transcription factor activity)|GO:0005634(nucleus)|GO:0007623(circadian rhythm)|GO:0008270(zinc ion binding)|GO:0009909(regulation of flower development)|GO:0030528(transcription regulator activity)
A_84_P819063	-0.053584	0.805802	0.757529	0.822176	-0.00943641	0.82399	0.921145	0.537021	-0.0565766	-0.441257	-0.246811	-0.183713	TC307065	AT3G46640.1	NM_114531	PCL1 (PHYTOCLOCK 1); DNA binding	GO:0003677(DNA binding)|GO:0003700(transcription factor activity)|GO:0007623(circadian rhythm)|GO:0045449(regulation of transcription)
A_84_P758025	-0.114537	0.54813	0.701755	0.699278	0.0149964	0.827751	0.820124	0.657514	-0.00561887	-0.174063	-0.388108	-0.458333		AT2G13431.1	NR_022499	misc_RNA
A_84_P23284	0.216384	1.07925	1.03485	1.71251	0.0334749	0.265882	0.228785	0.750197	-0.0357848	-1.1125	-0.619764	-0.627737	TC283380	AT4G21680.1	NM_118288	proton-dependent oligopeptide transport (POT) family protein	GO:0005215(transporter activity)|GO:0006857(oligopeptide transport)|GO:0016020(membrane)
A_84_P284310	0.106825	1.394	0.933576	-0.0122012	-0.0470501	1.07204	0.965029	0.0459579	0.0350546	0.927188	1.48239	0.813303	TC293112	AT2G01520.1	NM_126213	MLP328 (MLP-LIKE PROTEIN 328)	GO:0003674(molecular_function)|GO:0005575(cellular_component)|GO:0006952(defense response)|GO:0009607(response to biotic stimulus)
A_84_P560912	-0.303899	0.460862	0.525776	0.493106	0.00385993	-0.287459	-0.0255893	-0.128251	-0.00691515	-1.24692	-1.66049	-1.02514	TC298928	AT4G24275.1	NM_148371	hypothetical protein	GO:0003674(molecular_function)|GO:0005575(cellular_component)|GO:0006950(response to stress)
A_84_P78009	-0.0345705	0.602781	0.797486	0.699722	0.0211495	0.819982	0.866291	0.659043	0.0228283	-0.212225	-0.328447	-0.425259	TC302515	AT5G66052.1	NM_148167	hypothetical protein	GO:0003674(molecular_function)|GO:0005575(cellular_component)|GO:0008150(biological_process)
A_84_P22039	0.0397299	0.513654	0.874082	0.78242	-0.000754752	0.0676617	0.233527	0.0571703	-0.00114306	-0.944386	-1.13489	-0.89618	TC308499	AT2G31010.1	NM_128655	protein kinase family protein	GO:0005575(cellular_component)|GO:0006468(protein amino acid phosphorylation)|GO:0016301(kinase activity)
A_84_P68884	-0.0121742	1.57956	0.844249	1.90173	-0.0365924	1.60684	0.353787	1.41089	0.00638417	2.4506	2.21061	2.61975	TC294840	AT4G21840.1	NM_118304	methionine sulfoxide reductase domain-containing protein / SelR domain-containing protein	GO:0005575(cellular_component)|GO:0008113(peptide-methionine-(S)-S-oxide reductase activity)|GO:0008150(biological_process)
A_84_P812038	-0.230881	0.557727	0.626256	0.543844	0.00268893	0.403623	0.645694	0.277021	-0.030776	-0.943795	-1.57669	-1.03596	TC305987	AT1G28330.2	NM_179389	DRM1 (DORMANCY-ASSOCIATED PROTEIN 1)	GO:0003674(molecular_function)|GO:0003886(DNA (cytosine-5-)-methyltransferase activity)|GO:0005575(cellular_component)|GO:0006306(DNA methylation)|GO:0006346(methylation-dependent chromatin silencing)|GO:0008150(biological_process)|GO:0051567(histone H3-K9 methylation)
A_84_P507058	-0.339246	0.201366	0.526359	0.279951	-0.0614355	-0.19627	0.0528402	-0.515524	0.00660362	-1.42317	-1.67962	-1.80502	TC298756	AT5G57760.1	NM_125159	hypothetical protein	GO:0003674(molecular_function)|GO:0005575(cellular_component)|GO:0008150(biological_process)
A_84_P103846	-0.215252	0.0602084	0.654785	0.386685	-0.0502732	-0.406933	-0.0378552	-0.290117	0.00801399	-0.942932	-1.37224	-1.0272	TC288970	AT4G28190.1	NM_118959	ULT1 (ULTRAPETALA1); DNA binding / binding	GO:0003677(DNA binding)|GO:0005488(binding)|GO:0005634(nucleus)|GO:0005829(cytosol)|GO:0010022(meristem determinacy)|GO:0010080(regulation of floral meristem growth)|GO:0010081(regulation of inflorescence meristem growth)
A_84_P18796	-0.161472	0.809152	0.710929	1.08367	-0.00523926	0.113324	-0.271406	-0.134886	0.0408247	0.241899	0.25936	0.26774	TC301779	AT5G54960.1	NM_124878	PDC2 (PYRUVATE DECARBOXYLASE-2); pyruvate decarboxylase	GO:0001666(response to hypoxia)|GO:0004737(pyruvate decarboxylase activity)|GO:0005575(cellular_component)
A_84_P800952	-0.074461	1.06952	0.800901	1.41715	0.0533794	0.242069	-0.509736	-0.134752	-0.0517024	0.273797	0.328534	0.450194	TC301779	AT5G54960.1	NM_124878	PDC2 (PYRUVATE DECARBOXYLASE-2); pyruvate decarboxylase	GO:0001666(response to hypoxia)|GO:0004737(pyruvate decarboxylase activity)|GO:0005575(cellular_component)
A_84_P20450	-0.060354	0.582376	0.833265	0.811699	-0.101003	0.426877	0.269	0.419782	0.0469559	-0.699586	-0.498409	-0.497824	TC286031	AT4G22770.1	NM_118406	DNA-binding family protein	GO:0003677(DNA binding)
A_84_P12315	-0.101561	0.694699	0.793971	0.689989	-0.0391996	-0.147154	0.853642	0.0146606	0.00613615	-0.730856	-0.731821	-0.675134	TC304902	AT1G64660.1	NM_105141	ATMGL; catalytic/ methionine gamma-lyase	GO:0003824(catalytic activity)|GO:0005829(cytosol)|GO:0006520(amino acid metabolic process)|GO:0018826(methionine gamma-lyase activity)|GO:0019458(methionine catabolic process via 2-oxobutanoate)
A_84_P721670	-0.13974	1.03972	0.766046	0.857789	-0.0504146	0.311281	1.146	0.0836709	-0.0135872	-0.373236	-1.14984	-0.855705	TC303313	BU917423
A_84_P863235	-0.244064	0.71452	0.681283	1.20254	-0.0295594	0.555085	1.33891	0.684765	0.0476504	-0.359297	-1.35798	-0.329793	TC314219	BP667596
A_84_P22153	-0.186465	-0.372931	0.744836	0.582707	0.0127723	-0.730236	0.747245	-0.384817	0.00362731	-2.01305	-2.14509	-1.55854	TC301987	AT3G30775.1	NM_113981	ERD5 (EARLY RESPONSIVE TO DEHYDRATION 5); proline dehydrogenase	GO:0004657(proline dehydrogenase activity)|GO:0005739(mitochondrion)|GO:0006537(glutamate biosynthetic process)|GO:0006562(proline catabolic process)|GO:0006979(response to oxidative stress)
A_84_P15764	-0.152224	0.646723	0.807999	0.70683	-0.0211309	0.262061	0.268299	0.27965	-0.0212199	-0.25063	-0.689906	-0.339985	TC313856	AT4G32460.1	NM_202932	hypothetical protein	GO:0003674(molecular_function)|GO:0008150(biological_process)|GO:0012505(endomembrane system)
A_84_P164883	-0.00188868	0.777234	0.971728	0.801307	-0.000601236	0.521505	0.795097	0.512059	0.007529	-1.76173	-0.790184	-1.26377	TC291511	AT5G42900.1	NM_180790	hypothetical protein	GO:0003674(molecular_function)|GO:0005575(cellular_component)|GO:0008150(biological_process)
A_84_P20636	-0.276881	0.299689	0.698498	0.541731	-0.00749109	0.237824	0.171287	0.00377994	-0.01785	-0.50145	-0.913973	-0.774589	TC297636	AT5G40450.1	NM_123409	hypothetical protein	GO:0003674(molecular_function)|GO:0005575(cellular_component)|GO:0008150(biological_process)
A_84_P539392	-0.0128361	0.874992	0.963865	0.92613	0.005578	0.794909	0.663888	0.5279	0.0339887	-0.247577	-0.170831	-0.426042	TC301754	AT2G38465.1	NM_129403	hypothetical protein	GO:0003674(molecular_function)|GO:0005575(cellular_component)|GO:0008150(biological_process)
A_84_P100456	0.0947693	1.18479	1.07443	1.14307	-0.0105009	0.917829	0.634597	0.577988	0.0201679	-0.465058	0.159921	0.0310252	TC292275	AT1G07050.1	NM_100579	CONSTANS-like protein-related	GO:0003674(molecular_function)|GO:0005575(cellular_component)|GO:0008150(biological_process)
A_84_P523896	-0.357116	0.891314	0.649926	0.702879	0.0100989	0.194576	0.322309	0.134731	0.00762614	-1.15163	-1.31603	-1.09045	TC296074	AT5G50335.1	NM_124414	hypothetical protein	GO:0003674(molecular_function)|GO:0005575(cellular_component)|GO:0008150(biological_process)
A_84_P96276	0.0101846	0.870711	1.04086	0.893898	-0.00491497	1.03679	0.634081	0.803327	-0.0258125	-0.215346	0.104383	-0.1971	TC285113	AT5G60100.1	NM_125403	APRR3 (PSEUDO-RESPONSE REGULATOR 3); transcription regulator	GO:0000156(two-component response regulator activity)|GO:0007623(circadian rhythm)|GO:0016310(phosphorylation)|GO:0030528(transcription regulator activity)|GO:0032091(negative regulation of protein binding)|GO:0042752(regulation of circadian rhythm)
A_84_P20163	-0.214845	0.631142	0.817936	0.833165	0.000915669	0.610577	0.819005	0.690369	-0.0460801	-0.42409	-0.762496	-0.431963	TC304175	AT2G38400.1	NM_129396	AGT3 (ALANINE:GLYOXYLATE AMINOTRANSFERASE 3); alanine-glyoxylate transaminase	GO:0008453(alanine-glyoxylate transaminase activity)
A_84_P758588	0.270132	1.00204	1.31109	0.936241	-0.0343102	2.24932	0.404319	1.76924	0.0164986	2.66348	3.35462	1.9015	TC305259	AT2G30766.1	NM_001124947	hypothetical protein
A_84_P237873	-0.107715	0.402342	0.941697	0.825428	-0.00130716	-0.0330131	0.243269	0.0754153	-4.93936e-05	-0.965056	-1.04772	-0.706257	TC289612	AT5G04310.1	NM_120513	pectate lyase family protein	GO:0008150(biological_process)|GO:0030570(pectate lyase activity)|GO:0031225(anchored to membrane)
A_84_P20323	-0.158168	0.937692	0.902927	1.42442	-0.0382096	0.746322	1.1162	0.894639	-0.0348887	-0.255371	-0.538704	0.125659	TC289098	AT3G49620.1	NM_114822	DIN11 (DARK INDUCIBLE 11); oxidoreductase	GO:0007568(aging)|GO:0009267(cellular response to starvation)|GO:0009416(response to light stimulus)|GO:0009744(response to sucrose stimulus)|GO:0016491(oxidoreductase activity)
A_84_P804259	-0.0423645	1.25426	1.03596	1.37907	-0.0384763	0.307523	0.0826241	0.206513	-0.00980335	-0.121871	-0.687839	0.506714	TC296562	DR339542
A_84_P812554	-0.242636	0.751839	0.840942	1.20348	-0.0581076	0.481083	1.19405	0.520198	-0.00187904	-0.431119	-1.37035	-0.263198		TA29648_3702
A_84_P843011	0.0791735	1.33682	1.17341	1.29825	0.0181725	0.967248	0.600864	0.588089	-0.02987	-0.484745	0.120958	-0.0170187	NP303026	AT1G07050.1	NM_100579	CONSTANS-like protein-related	GO:0003674(molecular_function)|GO:0005575(cellular_component)|GO:0008150(biological_process)
A_84_P20176	-0.0596521	1.28432	1.04334	1.42905	-0.0379773	0.278328	0.0925327	0.185197	-0.00202347	-0.191491	-0.718565	0.46577	TC296562	AT2G44790.1	NM_130043	UCC2 (UCLACYANIN 2); copper ion binding	GO:0005507(copper ion binding)|GO:0006118(electron transport)|GO:0031225(anchored to membrane)
A_84_P19375	-0.0838733	1.63282	1.02282	1.6037	0.0118744	0.439833	-0.0805407	0.294781	0.00494904	-0.266735	-0.475123	0.217063	TC286780	AT3G49110.1	NM_114770	ATPCA/ATPRX33/PRX33/PRXCA (PEROXIDASE 33); peroxidase	GO:0004601(peroxidase activity)|GO:0006800(oxygen and reactive oxygen species metabolic process)|GO:0009416(response to light stimulus)|GO:0009505(plant-type cell wall)|GO:0009826(unidimensional cell growth)|GO:0042742(defense response to bacterium)|GO:0050832(defense response to fungus)
A_84_P17045	-0.0173909	0.610066	1.10881	1.11092	-0.0303828	0.260415	1.27334	0.245464	-0.0430222	-0.374866	-1.30024	0.253874	TC309279	AT1G08630.1	NM_100736	THA1 (THREONINE ALDOLASE 1); aldehyde-lyase	GO:0004793(threonine aldolase activity)|GO:0005575(cellular_component)|GO:0006567(threonine catabolic process)|GO:0016832(aldehyde-lyase activity)
A_84_P292144	-0.0258256	0.888205	1.11817	1.44289	0.00577181	0.50941	1.05027	0.804025	-0.0175223	-0.253181	-0.209049	0.275232	TC305936	AT3G23550.1	NM_113258	MATE efflux family protein	GO:0005215(transporter activity)|GO:0006855(multidrug transport)|GO:0015297(antiporter activity)|GO:0016020(membrane)
A_84_P22400	-0.411909	0.6363	0.789493	1.03903	-0.015832	0.504268	1.24529	0.601398	-0.00015778	-0.438661	-1.37475	-0.313048	TC306897	AT4G35770.1	NM_119743	SEN1 (DARK INDUCIBLE 1)	GO:0003674(molecular_function)|GO:0006979(response to oxidative stress)|GO:0007568(aging)|GO:0009416(response to light stimulus)|GO:0009507(chloroplast)|GO:0009611(response to wounding)|GO:0009744(response to sucrose stimulus)|GO:0009753(response to jasmonic acid stimulus)
A_84_P860087	0.0434809	0.872527	1.25932	1.14929	-0.0185827	0.689602	0.810439	0.672613	0.00127189	-0.144607	-0.256411	0.0731047	TC312566	AT1G27020.1	NM_102464	hypothetical protein	GO:0003674(molecular_function)|GO:0005575(cellular_component)|GO:0008150(biological_process)
A_84_P857167	-0.233138	0.903994	1.00165	1.40181	-0.0795427	0.386028	1.12812	0.365545	-0.0117111	-0.480124	-1.36745	-0.301375	TC310880	AT4G35770.1	NM_119743	SEN1 (DARK INDUCIBLE 1)	GO:0003674(molecular_function)|GO:0006979(response to oxidative stress)|GO:0007568(aging)|GO:0009416(response to light stimulus)|GO:0009507(chloroplast)|GO:0009611(response to wounding)|GO:0009744(response to sucrose stimulus)|GO:0009753(response to jasmonic acid stimulus)
A_84_P852577	0.0391735	1.64101	1.31775	1.54296	-0.00502883	1.32456	0.914515	0.990314	-0.0194973	-0.587035	0.180509	-0.560209	TC307658	TC307658			GO:0009648(photoperiodism)|GO:0009909(regulation of flower development)|GO:0042753(positive regulation of circadian rhythm)
A_84_P211628	-0.00355275	1.57942	1.29745	1.4571	-0.0251306	1.26607	0.916174	0.97139	0.0136872	-0.565768	0.231539	-0.484246	TC296319	AT2G40080.1	NM_129566	ELF4 (EARLY FLOWERING 4)	GO:0003674(molecular_function)|GO:0005634(nucleus)|GO:0009648(photoperiodism)|GO:0009909(regulation of flower development)|GO:0010017(red or far red light signaling pathway)|GO:0010114(response to red light)|GO:0042753(positive regulation of circadian rhythm)
A_84_P19239	-0.0259644	0.705875	1.27813	0.975756	-0.00681212	0.678085	0.665642	0.426974	-0.00660188	-0.92725	-1.20506	-1.23773	TC295757	AT1G44830.1	NM_103564	AP2 domain-containing transcription factor TINY, putative	GO:0003677(DNA binding)|GO:0003700(transcription factor activity)|GO:0005634(nucleus)|GO:0006355(regulation of transcription, DNA-dependent)
A_84_P546443	-0.0376833	1.0291	1.28967	1.25034	-0.0491268	0.732596	0.817311	0.802117	0.00460515	-0.549479	-0.170995	-0.469722	TC299731	AT2G28085.1	NM_128368	auxin-responsive family protein	GO:0003674(molecular_function)|GO:0005575(cellular_component)|GO:0009733(response to auxin stimulus)
A_84_P65264	-0.228626	1.04261	1.18763	1.41603	-0.0367585	0.663918	1.05779	0.905392	-0.0230699	-0.5675	-0.38932	-0.0637641	TC290044	AT3G15356.1	NM_148726	legume lectin family protein	GO:0008150(biological_process)|GO:0012505(endomembrane system)|GO:0030246(carbohydrate binding)
A_84_P159795	0.0481692	1.84761	1.53223	1.70102	0.0004594	0.67388	0.934696	0.733266	-0.00216683	-1.04728	-0.847275	-0.673243	TC304453	AT1G19530.1	NM_101811	hypothetical protein	GO:0003674(molecular_function)|GO:0005575(cellular_component)|GO:0006499(N-terminal protein myristoylation)
A_84_P14045	0.127473	2.31882	1.7714	2.09596	-0.0608924	0.810991	0.0230206	0.49584	-0.0332497	1.93379	0.89161	2.81837	TC287521	AT5G48430.1	NM_124218	aspartic-type endopeptidase/ pepsin A	GO:0004190(aspartic-type endopeptidase activity)|GO:0004194(pepsin A activity)|GO:0006508(proteolysis)|GO:0012505(endomembrane system)
A_84_P136115	-0.18511	0.724211	1.46293	1.23224	0.00826733	0.873214	1.25953	1.00816	0.061806	-0.59263	-0.984702	-0.363855	TC295977	AT1G75750.1	NM_106225	GASA1 (GAST1 PROTEIN HOMOLOG 1)	GO:0003674(molecular_function)|GO:0009505(plant-type cell wall)|GO:0009737(response to abscisic acid stimulus)|GO:0009739(response to gibberellin stimulus)|GO:0009741(response to brassinosteroid stimulus)|GO:0009826(unidimensional cell growth)
A_84_P859689	-0.200279	0.717513	1.4629	1.24973	0.0234624	0.892851	1.23407	1.03758	-0.0123087	-0.652766	-1.10269	-0.460226	TC312327	AT1G75750.1	NM_106225	GASA1 (GAST1 PROTEIN HOMOLOG 1)	GO:0003674(molecular_function)|GO:0009505(plant-type cell wall)|GO:0009737(response to abscisic acid stimulus)|GO:0009739(response to gibberellin stimulus)|GO:0009741(response to brassinosteroid stimulus)|GO:0009826(unidimensional cell growth)
A_84_P10039	-0.187147	1.01087	1.48006	1.36344	-0.00553848	0.564235	0.723626	0.549998	-0.00774334	-0.305724	-0.426997	-0.071931	TC303950	AT1G27020.1	NM_102464	hypothetical protein	GO:0003674(molecular_function)|GO:0005575(cellular_component)|GO:0008150(biological_process)
A_84_P14226	-0.217362	1.02526	1.47336	1.56385	0.0150772	0.548288	1.3292	0.774977	-0.0167652	-0.387847	-0.746788	-0.075348	TC308032	AT1G10070.1	NM_001035939	ATBCAT-2; branched-chain-amino-acid transaminase/ catalytic	GO:0003824(catalytic activity)|GO:0004084(branched-chain-amino-acid transaminase activity)|GO:0008152(metabolic process)|GO:0009081(branched chain family amino acid metabolic process)|GO:0009507(chloroplast)
A_84_P18821	-0.00979358	1.33802	1.72361	2.0034	-0.0168169	1.47537	1.53943	1.64091	0.028508	-0.330386	-0.223252	0.164036	TC286307	AT5G61160.1	NM_125509	AACT1 (ANTHOCYANIN 5-AROMATIC ACYLTRANSFERASE 1); transferase	GO:0005575(cellular_component)|GO:0008150(biological_process)|GO:0016740(transferase activity)
A_84_P14848	-0.00922161	1.14075	1.98014	1.91256	-0.0849971	-0.592524	0.215792	0.114895	-0.0243668	-0.782676	-1.327	0.454007	TC291718	AT4G14130.1	NM_117490	XTR7 (XYLOGLUCAN ENDOTRANSGLYCOSYLASE 7); hydrolase, acting on glycosyl bonds	GO:0005618(cell wall)|GO:0005975(carbohydrate metabolic process)|GO:0006073(glucan metabolic process)|GO:0006499(N-terminal protein myristoylation)|GO:0012505(endomembrane system)|GO:0016798(hydrolase activity, acting on glycosyl bonds)|GO:0048046(apoplast)

## Sheet: WoA<Rp-3h
WoA<Rp-3h
Type	without aphid	M. cerasi	M. persicae	R. padi	without aphid	M. cerasi	M. persicae	R. padi	without aphid	M. cerasi	M. persicae	R. padi
Time	3h				6h				24h
Systematic	log2												TIGRID	At accession	GenbankAccession	Gene function	GO
A_84_P815671	0.0127517	0.553235	0.772266	0.712748	0.0176245	0.131172	0.428168	0.0596758	-0.00552745	-0.880963	-0.588653	-0.761392	TC288175	AT3G59350.3	NM_001035816	serine/threonine protein kinase, putative	GO:0005575(cellular_component)|GO:0006468(protein amino acid phosphorylation)|GO:0016301(kinase activity)
A_84_P790164	0.0177776	0.255285	0.712592	0.718072	0.064506	-0.0929038	1.27316	-0.21857	-0.00342196	-0.929231	-1.05711	0.0536001	TC308748	AT5G41080.2	NM_203136	glycerophosphoryl diester phosphodiesterase family protein	GO:0006071(glycerol metabolic process)|GO:0008889(glycerophosphodiester phosphodiesterase activity)
A_84_P13432	0.0548751	0.704295	-0.164951	0.763757	-0.0149529	0.564697	-0.635033	0.0645652	0.00120496	0.3204	0.509256	0.529144	TC289087	AT1G32100.1	NM_102944	pinoresinol-lariciresinol reductase, putative	GO:0005575(cellular_component)|GO:0009807(lignan biosynthetic process)|GO:0010283(pinoresinol reductase activity)
A_84_P78009	-0.0345705	0.602781	0.797486	0.699722	0.0211495	0.819982	0.866291	0.659043	0.0228283	-0.212225	-0.328447	-0.425259	TC302515	AT5G66052.1	NM_148167	hypothetical protein	GO:0003674(molecular_function)|GO:0005575(cellular_component)|GO:0008150(biological_process)
A_84_P542646	0.0895468	-0.36082	0.377766	0.825601	0.00889834	0.46197	1.4993	0.405216	-3.18121e-05	-0.00629243	-0.91033	1.52832	TC288936	AT1G15040.1	NM_101374	glutamine amidotransferase-related	GO:0003824(catalytic activity)|GO:0005575(cellular_component)|GO:0006541(glutamine metabolic process)|GO:0016787(hydrolase activity)
A_84_P521598	0.0345932	-0.0722395	-0.588431	0.771202	-0.0423185	1.78713	0.773778	1.6247	-0.102334	0.682299	0.975855	0.88716	TC293232	AT2G22760.1	NM_127841	basic helix-loop-helix (bHLH) family protein	GO:0003677(DNA binding)|GO:0003700(transcription factor activity)|GO:0005634(nucleus)|GO:0045449(regulation of transcription)
A_84_P813019	-0.161982	0.392873	0.356138	0.580318	-0.000423562	-0.294129	0.664029	-0.337675	0.0196497	-0.961728	-1.72571	-0.804662		TA29937_3702
A_84_P22039	0.0397299	0.513654	0.874082	0.78242	-0.000754752	0.0676617	0.233527	0.0571703	-0.00114306	-0.944386	-1.13489	-0.89618	TC308499	AT2G31010.1	NM_128655	protein kinase family protein	GO:0005575(cellular_component)|GO:0006468(protein amino acid phosphorylation)|GO:0016301(kinase activity)
A_84_P22058	-0.0923449	0.493224	0.472785	0.660891	-0.000107149	-0.0146059	-0.125466	-0.102521	-0.0464641	-0.761087	-0.942396	-0.632125	TC306004	AT2G39180.1	NM_129475	protein kinase family protein	GO:0006468(protein amino acid phosphorylation)|GO:0012505(endomembrane system)|GO:0016301(kinase activity)
A_84_P524502	-0.309861	0.557412	0.339844	0.456196	-0.0625506	-0.81288	-0.492053	-0.936463	0.0147058	-1.05189	-1.37455	-0.947759	TC293715	AT3G59900.1	NM_115853	hypothetical protein	GO:0003674(molecular_function)|GO:0005622(intracellular)|GO:0008150(biological_process)
A_84_P816193	0.348937	0.697926	1.03567	1.11547	-0.0570873	0.295196	1.25427	0.174828	-0.0503147	-0.335522	-1.23371	0.375913	TC309279	AT1G08630.1	NM_100736	THA1 (THREONINE ALDOLASE 1); aldehyde-lyase	GO:0004793(threonine aldolase activity)|GO:0005575(cellular_component)|GO:0006567(threonine catabolic process)|GO:0016832(aldehyde-lyase activity)
A_84_P22153	-0.186465	-0.372931	0.744836	0.582707	0.0127723	-0.730236	0.747245	-0.384817	0.00362731	-2.01305	-2.14509	-1.55854	TC301987	AT3G30775.1	NM_113981	ERD5 (EARLY RESPONSIVE TO DEHYDRATION 5); proline dehydrogenase	GO:0004657(proline dehydrogenase activity)|GO:0005739(mitochondrion)|GO:0006537(glutamate biosynthetic process)|GO:0006562(proline catabolic process)|GO:0006979(response to oxidative stress)
A_84_P812038	-0.230881	0.557727	0.626256	0.543844	0.00268893	0.403623	0.645694	0.277021	-0.030776	-0.943795	-1.57669	-1.03596	TC305987	AT1G28330.2	NM_179389	DRM1 (DORMANCY-ASSOCIATED PROTEIN 1)	GO:0003674(molecular_function)|GO:0003886(DNA (cytosine-5-)-methyltransferase activity)|GO:0005575(cellular_component)|GO:0006306(DNA methylation)|GO:0006346(methylation-dependent chromatin silencing)|GO:0008150(biological_process)|GO:0051567(histone H3-K9 methylation)
A_84_P95079	0.0436692	0.578748	-0.168744	0.821564	0.0160339	0.480394	-0.85927	0.0672358	0.0449852	0.213451	0.441808	0.606225	TC295572	AT5G38610.1	NM_123222	invertase/pectin methylesterase inhibitor family protein	GO:0008150(biological_process)|GO:0012505(endomembrane system)|GO:0046910(pectinesterase inhibitor activity)
A_84_P803062	0.0737466	-0.129595	0.758209	0.853328	-0.0522222	-0.747614	0.425635	-0.759737	-0.0199835	-1.95745	-2.16353	-1.45964	TC305173	AT3G30775.1	NM_113981	ERD5 (EARLY RESPONSIVE TO DEHYDRATION 5); proline dehydrogenase	GO:0004657(proline dehydrogenase activity)|GO:0005739(mitochondrion)|GO:0006537(glutamate biosynthetic process)|GO:0006562(proline catabolic process)|GO:0006979(response to oxidative stress)
A_84_P71564	0.0719665	0.215364	0.759728	0.852057	0.00121722	-0.930826	0.34127	-0.856379	-0.0286957	-2.45177	-2.51224	-1.68921	TC287853	AT2G19800.1	NM_127538	MIOX2 (MYO-INOSITOL OXYGENASE 2)	GO:0005575(cellular_component)|GO:0050113(inositol oxygenase activity)
A_84_P12315	-0.101561	0.694699	0.793971	0.689989	-0.0391996	-0.147154	0.853642	0.0146606	0.00613615	-0.730856	-0.731821	-0.675134	TC304902	AT1G64660.1	NM_105141	ATMGL; catalytic/ methionine gamma-lyase	GO:0003824(catalytic activity)|GO:0005829(cytosol)|GO:0006520(amino acid metabolic process)|GO:0018826(methionine gamma-lyase activity)|GO:0019458(methionine catabolic process via 2-oxobutanoate)
A_84_P805118	-0.325871	0.531056	0.0777719	0.46937	0.00510306	-0.0371423	0.303934	-0.19686	-0.00490973	-0.50254	-1.33976	-0.346708	TC311392	AT3G15450.3	NM_001035625	hypothetical protein	GO:0003674(molecular_function)
A_84_P560912	-0.303899	0.460862	0.525776	0.493106	0.00385993	-0.287459	-0.0255893	-0.128251	-0.00691515	-1.24692	-1.66049	-1.02514	TC298928	AT4G24275.1	NM_148371	hypothetical protein	GO:0003674(molecular_function)|GO:0005575(cellular_component)|GO:0006950(response to stress)
A_84_P13746	-0.0263888	0.599303	0.751273	0.772671	0.0249392	0.19715	0.341763	0.0515939	0.0176926	-0.733742	-0.519422	-0.596275	TC288175	AT3G59350.1	NM_001035816	serine/threonine protein kinase, putative	GO:0005575(cellular_component)|GO:0006468(protein amino acid phosphorylation)|GO:0016301(kinase activity)
A_84_P164883	-0.00188868	0.777234	0.971728	0.801307	-0.000601236	0.521505	0.795097	0.512059	0.007529	-1.76173	-0.790184	-1.26377	TC291511	AT5G42900.1	NM_180790	hypothetical protein	GO:0003674(molecular_function)|GO:0005575(cellular_component)|GO:0008150(biological_process)
A_84_P758025	-0.114537	0.54813	0.701755	0.699278	0.0149964	0.827751	0.820124	0.657514	-0.00561887	-0.174063	-0.388108	-0.458333		AT2G13431.1	NR_022499	misc_RNA
A_84_P612892	0.167673	0.82209	0.962371	0.982456	0.0368642	0.686086	0.60291	0.477507	-0.0096646	-0.901205	-0.262622	-0.554745	TC306347	AT1G17665.1	NM_101629	hypothetical protein	GO:0003674(molecular_function)|GO:0008150(biological_process)|GO:0012505(endomembrane system)
A_84_P852295	-0.35928	0.250116	0.250659	0.455874	0.000562698	-0.237543	0.678951	-0.313571	-0.0477339	-1.0502	-1.77443	-0.806252	TC307389	AT3G47340.3	NM_180333	ASN1 (DARK INDUCIBLE 6)	GO:0004066(asparagine synthase (glutamine-hydrolyzing) activity)|GO:0009063(amino acid catabolic process)|GO:0009416(response to light stimulus)|GO:0009646(response to absence of light)|GO:0009744(response to sucrose stimulus)|GO:0043617(cellular response to sucrose starvation)
A_84_P20636	-0.276881	0.299689	0.698498	0.541731	-0.00749109	0.237824	0.171287	0.00377994	-0.01785	-0.50145	-0.913973	-0.774589	TC297636	AT5G40450.1	NM_123409	hypothetical protein	GO:0003674(molecular_function)|GO:0005575(cellular_component)|GO:0008150(biological_process)
A_84_P12200	0.0284003	0.611086	-0.236249	0.859217	0.0287497	0.641125	-0.568723	0.149882	-0.0152584	0.363308	0.650692	0.770745	TC288857	AT5G60660.1	NM_125459	PIP2;4/PIP2F (plasma membrane intrinsic protein 2;4); water channel	GO:0006810(transport)|GO:0015250(water channel activity)|GO:0016020(membrane)
A_84_P574406	0.0210471	0.924513	0.652927	0.877958	-0.00136808	0.586668	0.147496	0.196985	-0.000631551	-0.213596	-0.367053	-0.294762	TC302828	AT5G39240.1	NM_123286	hypothetical protein	GO:0008150(biological_process)
A_84_P14441	-0.0571185	0.422551	-0.401477	0.801902	-0.0419612	1.17213	1.10158	1.57518	0.0201555	0.864117	0.588734	0.849507	TC306550	AT2G29460.1	NM_128500	ATGSTU4 (GLUTATHIONE S-TRANSFERASE 22); glutathione transferase	GO:0004364(glutathione transferase activity)|GO:0005737(cytoplasm)|GO:0009407(toxin catabolic process)
A_84_P15764	-0.152224	0.646723	0.807999	0.70683	-0.0211309	0.262061	0.268299	0.27965	-0.0212199	-0.25063	-0.689906	-0.339985	TC313856	AT4G32460.1	NM_202932	hypothetical protein	GO:0003674(molecular_function)|GO:0008150(biological_process)|GO:0012505(endomembrane system)
A_84_P10874	-0.321225	0.609019	-0.0804652	0.540119	0.0094706	-0.445184	-0.244707	0.193255	0.00528506	-0.734759	-0.261485	-0.962407	TC293106	AT3G50970.1	NM_114957	LTI30 (LOW TEMPERATURE-INDUCED 30)	GO:0003674(molecular_function)|GO:0006950(response to stress)|GO:0009409(response to cold)|GO:0009414(response to water deprivation)|GO:0009415(response to water)|GO:0009631(cold acclimation)|GO:0009737(response to abscisic acid stimulus)|GO:0016020(membrane)
A_84_P20450	-0.060354	0.582376	0.833265	0.811699	-0.101003	0.426877	0.269	0.419782	0.0469559	-0.699586	-0.498409	-0.497824	TC286031	AT4G22770.1	NM_118406	DNA-binding family protein	GO:0003677(DNA binding)
A_84_P819063	-0.053584	0.805802	0.757529	0.822176	-0.00943641	0.82399	0.921145	0.537021	-0.0565766	-0.441257	-0.246811	-0.183713	TC307065	AT3G46640.1	NM_114531	PCL1 (PHYTOCLOCK 1); DNA binding	GO:0003677(DNA binding)|GO:0003700(transcription factor activity)|GO:0007623(circadian rhythm)|GO:0045449(regulation of transcription)
A_84_P809730	-0.0387061	0.553613	0.450884	0.837146	-0.0325822	0.116827	-0.19815	-0.178669	-0.0295398	-0.887426	-0.842694	-0.422685	TC307471	AT5G14920.1	NM_121496	gibberellin-regulated family protein	GO:0005199(structural constituent of cell wall)|GO:0009739(response to gibberellin stimulus)|GO:0012505(endomembrane system)
A_84_P96276	0.0101846	0.870711	1.04086	0.893898	-0.00491497	1.03679	0.634081	0.803327	-0.0258125	-0.215346	0.104383	-0.1971	TC285113	AT5G60100.1	NM_125403	APRR3 (PSEUDO-RESPONSE REGULATOR 3); transcription regulator	GO:0000156(two-component response regulator activity)|GO:0007623(circadian rhythm)|GO:0016310(phosphorylation)|GO:0030528(transcription regulator activity)|GO:0032091(negative regulation of protein binding)|GO:0042752(regulation of circadian rhythm)
A_84_P12605	-0.347178	0.508197	0.19797	0.537955	-0.0194298	-1.04386	-0.511375	-0.830873	0.0368595	-0.711525	-0.990193	-0.531732	NP454671	AT2G18010.1	NM_127357	auxin-responsive family protein	GO:0003674(molecular_function)|GO:0009733(response to auxin stimulus)
A_84_P515014	0.280324	0.995094	-0.270913	1.17542	0.0541702	0.793243	-0.958581	0.288202	0.0281484	0.61653	0.822268	0.983792	TC296298	AT5G48920.1	NM_124269	hydroxyproline-rich glycoprotein family protein	GO:0003674(molecular_function)|GO:0008150(biological_process)
A_84_P515420	-0.0211497	0.785947	0.532293	0.875512	0.0443912	0.206022	-0.477608	0.138573	0.0278826	-0.0692158	0.134747	0.320301	TC299101	AT2G32280.1	NM_128787	hypothetical protein	GO:0003674(molecular_function)|GO:0008150(biological_process)|GO:0012505(endomembrane system)
A_84_P14274	-0.187554	1.08821	-2.17538	0.709487	-0.0219094	0.428927	1.05444	1.36196	-0.0142419	-0.358652	0.736392	-0.269989	TC292541	AT1G52690.1	NM_202280	late embryogenesis abundant protein, putative / LEA protein, putative	GO:0003674(molecular_function)|GO:0005575(cellular_component)|GO:0009793(embryonic development ending in seed dormancy)
A_84_P237873	-0.107715	0.402342	0.941697	0.825428	-0.00130716	-0.0330131	0.243269	0.0754153	-4.93936e-05	-0.965056	-1.04772	-0.706257	TC289612	AT5G04310.1	NM_120513	pectate lyase family protein	GO:0008150(biological_process)|GO:0030570(pectate lyase activity)|GO:0031225(anchored to membrane)
A_84_P22755	0.167409	0.872411	-0.429369	1.10232	-0.0556473	0.540738	-1.41735	-0.0126821	-0.0451186	0.395766	0.883004	0.967149	TC296863	AT1G26820.1	NM_102446	RNS3 (RIBONUCLEASE 3); endoribonuclease	GO:0004521(endoribonuclease activity)|GO:0007568(aging)|GO:0012505(endomembrane system)
A_84_P539392	-0.0128361	0.874992	0.963865	0.92613	0.005578	0.794909	0.663888	0.5279	0.0339887	-0.247577	-0.170831	-0.426042	TC301754	AT2G38465.1	NM_129403	hypothetical protein	GO:0003674(molecular_function)|GO:0005575(cellular_component)|GO:0008150(biological_process)
A_84_P827147	-0.0206852	0.10638	0.204833	0.918593	0.0447664	0.187224	-0.49837	0.708096	0.00020996	1.01644	1.50927	1.00313	TC309257	AT1G61800.1	NM_104862	GPT2 (glucose-6-phosphate/phosphate translocator 2); antiporter/ glucose-6-phosphate transmembrane transporter	GO:0009507(chloroplast)|GO:0015152(glucose-6-phosphate transmembrane transporter activity)|GO:0015297(antiporter activity)|GO:0015712(hexose phosphate transport)|GO:0016020(membrane)|GO:0016021(integral to membrane)
A_84_P721670	-0.13974	1.03972	0.766046	0.857789	-0.0504146	0.311281	1.146	0.0836709	-0.0135872	-0.373236	-1.14984	-0.855705	TC303313	BU917423
A_84_P19239	-0.0259644	0.705875	1.27813	0.975756	-0.00681212	0.678085	0.665642	0.426974	-0.00660188	-0.92725	-1.20506	-1.23773	TC295757	AT1G44830.1	NM_103564	AP2 domain-containing transcription factor TINY, putative	GO:0003677(DNA binding)|GO:0003700(transcription factor activity)|GO:0005634(nucleus)|GO:0006355(regulation of transcription, DNA-dependent)
A_84_P811729	-0.114352	0.892942	0.676662	0.928821	-0.0918255	0.0844289	0.117092	-0.158709	0.035408	-0.586007	-1.06315	-0.912882	TC296927	AT2G33830.1	NM_128942	dormancy/auxin associated family protein	GO:0005575(cellular_component)|GO:0008150(biological_process)
A_84_P20163	-0.214845	0.631142	0.817936	0.833165	0.000915669	0.610577	0.819005	0.690369	-0.0460801	-0.42409	-0.762496	-0.431963	TC304175	AT2G38400.1	NM_129396	AGT3 (ALANINE:GLYOXYLATE AMINOTRANSFERASE 3); alanine-glyoxylate transaminase	GO:0008453(alanine-glyoxylate transaminase activity)
A_84_P100456	0.0947693	1.18479	1.07443	1.14307	-0.0105009	0.917829	0.634597	0.577988	0.0201679	-0.465058	0.159921	0.0310252	TC292275	AT1G07050.1	NM_100579	CONSTANS-like protein-related	GO:0003674(molecular_function)|GO:0005575(cellular_component)|GO:0008150(biological_process)
A_84_P523896	-0.357116	0.891314	0.649926	0.702879	0.0100989	0.194576	0.322309	0.134731	0.00762614	-1.15163	-1.31603	-1.09045	TC296074	AT5G50335.1	NM_124414	hypothetical protein	GO:0003674(molecular_function)|GO:0005575(cellular_component)|GO:0008150(biological_process)
A_84_P845406	-0.177529	0.690627	0.400592	0.884927	0.0698536	-0.181618	0.469748	-0.343695	-0.110104	-1.02875	-1.79549	-0.725567	TC290715	AT3G47340.1	NM_114602	ASN1 (DARK INDUCIBLE 6)	GO:0004066(asparagine synthase (glutamine-hydrolyzing) activity)|GO:0009063(amino acid catabolic process)|GO:0009416(response to light stimulus)|GO:0009646(response to absence of light)|GO:0009744(response to sucrose stimulus)|GO:0043617(cellular response to sucrose starvation)
A_84_P21049	-0.140504	0.321064	0.282597	0.956598	-0.018844	0.063136	0.57138	0.253142	0.045567	-0.119972	-0.30269	0.0785891	TC285860	AT2G26560.1	NM_128213	PLP2 (PHOSPHOLIPASE A 2A); nutrient reservoir	GO:0005737(cytoplasm)|GO:0006629(lipid metabolic process)|GO:0009626(plant-type hypersensitive response)|GO:0016020(membrane)|GO:0016298(lipase activity)|GO:0045735(nutrient reservoir activity)
A_84_P812545	0.00523269	0.635276	0.513073	1.10589	0.0102419	0.567948	1.27406	0.559778	0.0672178	-0.32363	-1.29017	-0.277065	TC306897	TA29646_3702
A_84_P860087	0.0434809	0.872527	1.25932	1.14929	-0.0185827	0.689602	0.810439	0.672613	0.00127189	-0.144607	-0.256411	0.0731047	TC312566	AT1G27020.1	NM_102464	hypothetical protein	GO:0003674(molecular_function)|GO:0005575(cellular_component)|GO:0008150(biological_process)
A_84_P17045	-0.0173909	0.610066	1.10881	1.11092	-0.0303828	0.260415	1.27334	0.245464	-0.0430222	-0.374866	-1.30024	0.253874	TC309279	AT1G08630.1	NM_100736	THA1 (THREONINE ALDOLASE 1); aldehyde-lyase	GO:0004793(threonine aldolase activity)|GO:0005575(cellular_component)|GO:0006567(threonine catabolic process)|GO:0016832(aldehyde-lyase activity)
A_84_P21769	-0.0163415	0.280037	-0.474294	1.11629	0.0127192	1.06809	-0.205654	1.21265	-0.0274357	1.29609	0.997305	2.12676	NP043293	AT1G61120.1	NM_104793	terpene synthase/cyclase family protein	GO:0000287(magnesium ion binding)|GO:0000304(response to singlet oxygen)|GO:0005575(cellular_component)|GO:0016829(lyase activity)
A_84_P757973	-0.0112613	0.745147	0.695416	1.12673	-0.0290193	1.45841	0.210108	1.33864	0.00531273	0.81463	0.936229	1.13048	TC302129	AT2G44578.1	NM_001084589	protein binding / zinc ion binding	GO:0005515(protein binding)|GO:0008270(zinc ion binding)|GO:0012505(endomembrane system)
A_84_P843011	0.0791735	1.33682	1.17341	1.29825	0.0181725	0.967248	0.600864	0.588089	-0.02987	-0.484745	0.120958	-0.0170187	NP303026	AT1G07050.1	NM_100579	CONSTANS-like protein-related	GO:0003674(molecular_function)|GO:0005575(cellular_component)|GO:0008150(biological_process)
A_84_P18796	-0.161472	0.809152	0.710929	1.08367	-0.00523926	0.113324	-0.271406	-0.134886	0.0408247	0.241899	0.25936	0.26774	TC301779	AT5G54960.1	NM_124878	PDC2 (PYRUVATE DECARBOXYLASE-2); pyruvate decarboxylase	GO:0001666(response to hypoxia)|GO:0004737(pyruvate decarboxylase activity)|GO:0005575(cellular_component)
A_84_P546443	-0.0376833	1.0291	1.28967	1.25034	-0.0491268	0.732596	0.817311	0.802117	0.00460515	-0.549479	-0.170995	-0.469722	TC299731	AT2G28085.1	NM_128368	auxin-responsive family protein	GO:0003674(molecular_function)|GO:0005575(cellular_component)|GO:0009733(response to auxin stimulus)
A_84_P136115	-0.18511	0.724211	1.46293	1.23224	0.00826733	0.873214	1.25953	1.00816	0.061806	-0.59263	-0.984702	-0.363855	TC295977	AT1G75750.1	NM_106225	GASA1 (GAST1 PROTEIN HOMOLOG 1)	GO:0003674(molecular_function)|GO:0009505(plant-type cell wall)|GO:0009737(response to abscisic acid stimulus)|GO:0009739(response to gibberellin stimulus)|GO:0009741(response to brassinosteroid stimulus)|GO:0009826(unidimensional cell growth)
A_84_P804259	-0.0423645	1.25426	1.03596	1.37907	-0.0384763	0.307523	0.0826241	0.206513	-0.00980335	-0.121871	-0.687839	0.506714	TC296562	DR339542
A_84_P812554	-0.242636	0.751839	0.840942	1.20348	-0.0581076	0.481083	1.19405	0.520198	-0.00187904	-0.431119	-1.37035	-0.263198		TA29648_3702
A_84_P863235	-0.244064	0.71452	0.681283	1.20254	-0.0295594	0.555085	1.33891	0.684765	0.0476504	-0.359297	-1.35798	-0.329793	TC314219	BP667596
A_84_P859689	-0.200279	0.717513	1.4629	1.24973	0.0234624	0.892851	1.23407	1.03758	-0.0123087	-0.652766	-1.10269	-0.460226	TC312327	AT1G75750.1	NM_106225	GASA1 (GAST1 PROTEIN HOMOLOG 1)	GO:0003674(molecular_function)|GO:0009505(plant-type cell wall)|GO:0009737(response to abscisic acid stimulus)|GO:0009739(response to gibberellin stimulus)|GO:0009741(response to brassinosteroid stimulus)|GO:0009826(unidimensional cell growth)
A_84_P22400	-0.411909	0.6363	0.789493	1.03903	-0.015832	0.504268	1.24529	0.601398	-0.00015778	-0.438661	-1.37475	-0.313048	TC306897	AT4G35770.1	NM_119743	SEN1 (DARK INDUCIBLE 1)	GO:0003674(molecular_function)|GO:0006979(response to oxidative stress)|GO:0007568(aging)|GO:0009416(response to light stimulus)|GO:0009507(chloroplast)|GO:0009611(response to wounding)|GO:0009744(response to sucrose stimulus)|GO:0009753(response to jasmonic acid stimulus)
A_84_P211628	-0.00355275	1.57942	1.29745	1.4571	-0.0251306	1.26607	0.916174	0.97139	0.0136872	-0.565768	0.231539	-0.484246	TC296319	AT2G40080.1	NM_129566	ELF4 (EARLY FLOWERING 4)	GO:0003674(molecular_function)|GO:0005634(nucleus)|GO:0009648(photoperiodism)|GO:0009909(regulation of flower development)|GO:0010017(red or far red light signaling pathway)|GO:0010114(response to red light)|GO:0042753(positive regulation of circadian rhythm)
A_84_P292144	-0.0258256	0.888205	1.11817	1.44289	0.00577181	0.50941	1.05027	0.804025	-0.0175223	-0.253181	-0.209049	0.275232	TC305936	AT3G23550.1	NM_113258	MATE efflux family protein	GO:0005215(transporter activity)|GO:0006855(multidrug transport)|GO:0015297(antiporter activity)|GO:0016020(membrane)
A_84_P20176	-0.0596521	1.28432	1.04334	1.42905	-0.0379773	0.278328	0.0925327	0.185197	-0.00202347	-0.191491	-0.718565	0.46577	TC296562	AT2G44790.1	NM_130043	UCC2 (UCLACYANIN 2); copper ion binding	GO:0005507(copper ion binding)|GO:0006118(electron transport)|GO:0031225(anchored to membrane)
A_84_P800952	-0.074461	1.06952	0.800901	1.41715	0.0533794	0.242069	-0.509736	-0.134752	-0.0517024	0.273797	0.328534	0.450194	TC301779	AT5G54960.1	NM_124878	PDC2 (PYRUVATE DECARBOXYLASE-2); pyruvate decarboxylase	GO:0001666(response to hypoxia)|GO:0004737(pyruvate decarboxylase activity)|GO:0005575(cellular_component)
A_84_P23284	0.216384	1.07925	1.03485	1.71251	0.0334749	0.265882	0.228785	0.750197	-0.0357848	-1.1125	-0.619764	-0.627737	TC283380	AT4G21680.1	NM_118288	proton-dependent oligopeptide transport (POT) family protein	GO:0005215(transporter activity)|GO:0006857(oligopeptide transport)|GO:0016020(membrane)
A_84_P852577	0.0391735	1.64101	1.31775	1.54296	-0.00502883	1.32456	0.914515	0.990314	-0.0194973	-0.587035	0.180509	-0.560209	TC307658	TC307658			GO:0009648(photoperiodism)|GO:0009909(regulation of flower development)|GO:0042753(positive regulation of circadian rhythm)
A_84_P10039	-0.187147	1.01087	1.48006	1.36344	-0.00553848	0.564235	0.723626	0.549998	-0.00774334	-0.305724	-0.426997	-0.071931	TC303950	AT1G27020.1	NM_102464	hypothetical protein	GO:0003674(molecular_function)|GO:0005575(cellular_component)|GO:0008150(biological_process)
A_84_P20323	-0.158168	0.937692	0.902927	1.42442	-0.0382096	0.746322	1.1162	0.894639	-0.0348887	-0.255371	-0.538704	0.125659	TC289098	AT3G49620.1	NM_114822	DIN11 (DARK INDUCIBLE 11); oxidoreductase	GO:0007568(aging)|GO:0009267(cellular response to starvation)|GO:0009416(response to light stimulus)|GO:0009744(response to sucrose stimulus)|GO:0016491(oxidoreductase activity)
A_84_P857167	-0.233138	0.903994	1.00165	1.40181	-0.0795427	0.386028	1.12812	0.365545	-0.0117111	-0.480124	-1.36745	-0.301375	TC310880	AT4G35770.1	NM_119743	SEN1 (DARK INDUCIBLE 1)	GO:0003674(molecular_function)|GO:0006979(response to oxidative stress)|GO:0007568(aging)|GO:0009416(response to light stimulus)|GO:0009507(chloroplast)|GO:0009611(response to wounding)|GO:0009744(response to sucrose stimulus)|GO:0009753(response to jasmonic acid stimulus)
A_84_P65264	-0.228626	1.04261	1.18763	1.41603	-0.0367585	0.663918	1.05779	0.905392	-0.0230699	-0.5675	-0.38932	-0.0637641	TC290044	AT3G15356.1	NM_148726	legume lectin family protein	GO:0008150(biological_process)|GO:0012505(endomembrane system)|GO:0030246(carbohydrate binding)
A_84_P159795	0.0481692	1.84761	1.53223	1.70102	0.0004594	0.67388	0.934696	0.733266	-0.00216683	-1.04728	-0.847275	-0.673243	TC304453	AT1G19530.1	NM_101811	hypothetical protein	GO:0003674(molecular_function)|GO:0005575(cellular_component)|GO:0006499(N-terminal protein myristoylation)
A_84_P19375	-0.0838733	1.63282	1.02282	1.6037	0.0118744	0.439833	-0.0805407	0.294781	0.00494904	-0.266735	-0.475123	0.217063	TC286780	AT3G49110.1	NM_114770	ATPCA/ATPRX33/PRX33/PRXCA (PEROXIDASE 33); peroxidase	GO:0004601(peroxidase activity)|GO:0006800(oxygen and reactive oxygen species metabolic process)|GO:0009416(response to light stimulus)|GO:0009505(plant-type cell wall)|GO:0009826(unidimensional cell growth)|GO:0042742(defense response to bacterium)|GO:0050832(defense response to fungus)
A_84_P14226	-0.217362	1.02526	1.47336	1.56385	0.0150772	0.548288	1.3292	0.774977	-0.0167652	-0.387847	-0.746788	-0.075348	TC308032	AT1G10070.1	NM_001035939	ATBCAT-2; branched-chain-amino-acid transaminase/ catalytic	GO:0003824(catalytic activity)|GO:0004084(branched-chain-amino-acid transaminase activity)|GO:0008152(metabolic process)|GO:0009081(branched chain family amino acid metabolic process)|GO:0009507(chloroplast)
A_84_P68884	-0.0121742	1.57956	0.844249	1.90173	-0.0365924	1.60684	0.353787	1.41089	0.00638417	2.4506	2.21061	2.61975	TC294840	AT4G21840.1	NM_118304	methionine sulfoxide reductase domain-containing protein / SelR domain-containing protein	GO:0005575(cellular_component)|GO:0008113(peptide-methionine-(S)-S-oxide reductase activity)|GO:0008150(biological_process)
A_84_P14848	-0.00922161	1.14075	1.98014	1.91256	-0.0849971	-0.592524	0.215792	0.114895	-0.0243668	-0.782676	-1.327	0.454007	TC291718	AT4G14130.1	NM_117490	XTR7 (XYLOGLUCAN ENDOTRANSGLYCOSYLASE 7); hydrolase, acting on glycosyl bonds	GO:0005618(cell wall)|GO:0005975(carbohydrate metabolic process)|GO:0006073(glucan metabolic process)|GO:0006499(N-terminal protein myristoylation)|GO:0012505(endomembrane system)|GO:0016798(hydrolase activity, acting on glycosyl bonds)|GO:0048046(apoplast)
A_84_P14045	0.127473	2.31882	1.7714	2.09596	-0.0608924	0.810991	0.0230206	0.49584	-0.0332497	1.93379	0.89161	2.81837	TC287521	AT5G48430.1	NM_124218	aspartic-type endopeptidase/ pepsin A	GO:0004190(aspartic-type endopeptidase activity)|GO:0004194(pepsin A activity)|GO:0006508(proteolysis)|GO:0012505(endomembrane system)
A_84_P18821	-0.00979358	1.33802	1.72361	2.0034	-0.0168169	1.47537	1.53943	1.64091	0.028508	-0.330386	-0.223252	0.164036	TC286307	AT5G61160.1	NM_125509	AACT1 (ANTHOCYANIN 5-AROMATIC ACYLTRANSFERASE 1); transferase	GO:0005575(cellular_component)|GO:0008150(biological_process)|GO:0016740(transferase activity)

## Sheet: WoA=Mc-3h
WoA=Mc-3h
Type	without aphid	M. cerasi	M. persicae	R. padi	without aphid	M. cerasi	M. persicae	R. padi	without aphid	M. cerasi	M. persicae	R. padi
Time	3h				6h				24h
Systematic	log2												TIGRID	At accession	GenbankAccession	Gene function	GO
A_84_P20890	-0.0173745	0.0314941	0.32056	-0.055759	-0.000936688	1.85678	0.845542	0.861776	-0.00274499	1.36984	1.61924	1.02781	TC294166	AT1G72920.1	NM_105950	disease resistance protein (TIR-NBS class), putative	GO:0004888(transmembrane receptor activity)|GO:0006952(defense response)|GO:0031224(intrinsic to membrane)
A_84_P10863	-0.164226	-0.211924	-0.847302	-0.330889	-0.0348149	0.0692867	0.239448	1.02839	-0.0122652	-1.91836	-0.987973	-1.99322	TC284816	AT3G48520.1	NM_114710	CYP94B3 (cytochrome P450, family 94, subfamily B, polypeptide 3); oxygen binding	GO:0006118(electron transport)|GO:0012505(endomembrane system)|GO:0019825(oxygen binding)
A_84_P535484	-0.123532	-0.0765077	0.598049	0.299932	-0.0182375	0.0632053	0.075327	-0.117841	-0.0491051	-1.43115	-1.77532	-1.57839	TC310807	AT1G03010.1	NM_100182	phototropic-responsive NPH3 family protein	GO:0004871(signal transducer activity)|GO:0009416(response to light stimulus)
A_84_P11248	0.151403	0.104923	-1.69552	-0.543749	0.00305402	-0.198286	-0.243645	0.543198	0.0327786	-1.43964	-0.628425	-1.54821	TC284619	AT5G59220.1	NM_125312	protein phosphatase 2C, putative / PP2C, putative	GO:0004722(protein serine/threonine phosphatase activity)|GO:0009507(chloroplast)|GO:0009737(response to abscisic acid stimulus)
A_84_P11239	0.000145688	-0.0461786	0.516138	0.326683	-0.0161864	0.480099	-0.0595289	0.457036	0.0302969	0.0650409	0.483777	-0.0243337	TC294174	AT5G56840.1	NM_125067	DNA-binding family protein	GO:0003676(nucleic acid binding)|GO:0003677(DNA binding)|GO:0003700(transcription factor activity)|GO:0045449(regulation of transcription)
A_84_P784314	0.031345	0.0773216	0.118929	0.14112	-0.0139085	0.480125	-0.473629	-0.0336339	-0.0545259	0.169313	0.510783	0.0232254	TC290709	AT3G45650.1	NM_114434	NAXT1 (NITRATE EXCRETION TRANSPORTER1); nitrate efflux transmembrane transporter/ transporter	GO:0005215(transporter activity)|GO:0005886(plasma membrane)|GO:0006857(oligopeptide transport)|GO:0010447(response to acidity)|GO:0015706(nitrate transport)|GO:0016020(membrane)
A_84_P145159	0.540552	0.586263	-1.83642	-0.181731	0.0507391	0.656352	0.872305	1.45042	-0.00644353	-0.93074	0.376799	-1.42728	TC288653	AT5G50360.1	NM_124417	hypothetical protein	GO:0003674(molecular_function)|GO:0008150(biological_process)
A_84_P272600	0.100308	0.145753	0.122748	-0.446615	0.0394404	3.76857	2.20113	2.60051	0.0571446	2.53793	3.37745	2.66256	TC295295	AT5G21960.1	NM_147879	AP2 domain-containing transcription factor, putative	GO:0003677(DNA binding)|GO:0003700(transcription factor activity)|GO:0005634(nucleus)|GO:0006355(regulation of transcription, DNA-dependent)
A_84_P503909	-0.0283995	0.0164188	0.166533	0.118091	-0.0113081	-0.198737	0.210534	-0.275448	-0.0174672	-0.799046	-1.3443	-0.576636	TC298569	AT2G37025.1	NM_179944	TRFL8 (TRF-LIKE 8); DNA binding	GO:0003677(DNA binding)|GO:0045449(regulation of transcription)
A_84_P863140	-0.0811181	-0.0364715	-0.306347	0.148792	0.104674	0.522145	-0.729016	0.302481	-0.00543363	0.817966	1.23036	1.32667	TC314188	AT5G42020.2	NM_123567	BIP (LUMINAL BINDING PROTEIN); ATP binding	GO:0005524(ATP binding)|GO:0005783(endoplasmic reticulum)|GO:0005788(endoplasmic reticulum lumen)|GO:0006457(protein folding)|GO:0009408(response to heat)
A_84_P255680	-0.0985261	-0.141022	-0.358217	-0.407784	-0.0441338	0.123135	-0.770164	-0.234477	0.0214331	-0.160659	0.355981	0.392056	TC308674	AT5G05960.1	NM_120678	protease inhibitor/seed storage/lipid transfer protein (LTP) family protein	GO:0006869(lipid transport)|GO:0008289(lipid binding)|GO:0012505(endomembrane system)
A_84_P15931	0.0519083	0.0100276	0.419844	0.0209069	0.00472334	1.84027	0.777819	0.885133	0.0220179	0.963813	1.40768	0.616977	TC293666	AT5G47230.1	NM_124094	ERF5 (ETHYLENE RESPONSIVE ELEMENT BINDING FACTOR 5); DNA binding / transcription activator/ transcription factor	GO:0003677(DNA binding)|GO:0003700(transcription factor activity)|GO:0005634(nucleus)|GO:0006355(regulation of transcription, DNA-dependent)|GO:0009409(response to cold)|GO:0009873(ethylene mediated signaling pathway)|GO:0016563(transcription activator activity)
A_84_P844671	-0.122187	-0.0822158	0.0126442	-0.0781218	-0.036354	-0.350358	0.572705	-0.342337	0.026886	-0.593341	-1.09926	-0.274382	TC283876	AT4G38470.1	NM_120008	protein kinase family protein	GO:0004672(protein kinase activity)|GO:0004712(protein serine/threonine/tyrosine kinase activity)|GO:0006468(protein amino acid phosphorylation)|GO:0008152(metabolic process)
A_84_P850921	0.0545997	0.0156552	-0.212785	-0.0161742	-0.0249131	-0.0785184	-0.66899	-0.525742	0.0529119	1.15569	1.44785	1.0398	TC305666	AT2G21330.3	NM_001036310	fructose-bisphosphate aldolase, putative	GO:0003824(catalytic activity)|GO:0004332(fructose-bisphosphate aldolase activity)|GO:0006098(pentose-phosphate shunt)|GO:0009570(chloroplast stroma)|GO:0010287(plastoglobule)
A_84_P549850	0.153295	0.115667	-1.82355	-0.542944	-0.0574618	0.458239	0.697862	1.23456	0.0265281	-1.24298	0.424401	-1.39967	TC306656	AT1G60190.1	NM_104709	armadillo/beta-catenin repeat family protein / U-box domain-containing protein	GO:0000151(ubiquitin ligase complex)|GO:0004842(ubiquitin-protein ligase activity)|GO:0005488(binding)|GO:0005515(protein binding)|GO:0008270(zinc ion binding)|GO:0016567(protein ubiquitination)
A_84_P762197	0.0904774	0.0531232	-1.16674	-0.747498	-0.0205773	-1.02158	-0.899519	-0.247609	-0.00674658	-1.79918	-1.16511	-2.29887	TC301957	AT3G03341.1	NM_001125087	hypothetical protein
A_84_P21931	0.038315	0.0753629	0.16063	0.171677	0.0183727	1.59475	0.802075	0.940758	-0.0314785	0.626848	1.27883	0.698834	TC295205	AT1G28370.1	NM_102603	ATERF11/ERF11 (ERF domain protein 11); DNA binding / transcription factor/ transcription repressor	GO:0003677(DNA binding)|GO:0003700(transcription factor activity)|GO:0005634(nucleus)|GO:0006355(regulation of transcription, DNA-dependent)|GO:0009873(ethylene mediated signaling pathway)|GO:0016564(transcription repressor activity)
A_84_P17435	0.0597767	0.0229165	-0.612282	-0.0563078	-0.006153	-0.365597	-1.32838	-0.514212	0.0147611	0.0731585	0.275485	0.695937	TC304231	AT3G19710.1	NM_112861	BCAT4 (BRANCHED-CHAIN AMINOTRANSFERASE4); catalytic/ methionine-oxo-acid transaminase	GO:0003824(catalytic activity)|GO:0005829(cytosol)|GO:0010326(methionine-oxo-acid transaminase activity)|GO:0019761(glucosinolate biosynthetic process)
A_84_P862479	-0.0905315	-0.12725	-0.165633	-0.0437246	0.0496488	2.01707	0.777678	1.36789	0.0137147	1.28236	1.6042	1.46885	TC313942	BE523647
A_84_P816205	-0.0570598	-0.093511	0.0874076	-0.0743527	0.0320702	-0.0510004	0.258498	-0.128165	0.0191249	-1.1107	-1.23384	-1.0921	TC292777	AT2G40940.1	NM_129658	ERS1 (ETHYLENE RESPONSE SENSOR 1); receptor	GO:0004673(protein histidine kinase activity)|GO:0004872(receptor activity)|GO:0010105(negative regulation of ethylene mediated signaling pathway)|GO:0016020(membrane)|GO:0051740(ethylene binding)
A_84_P237173	-0.280254	-0.244582	-0.193119	-0.312048	-0.0112318	0.692769	0.880208	1.83854	-0.0324078	-1.45969	-0.984807	-1.44818	TC301449	AT1G10585.1	NM_100934	transcription factor	GO:0003700(transcription factor activity)|GO:0005634(nucleus)|GO:0045449(regulation of transcription)
A_84_P17326	0.0574013	0.0929434	0.342566	0.242244	0.0115054	1.40985	0.430332	0.678572	0.0178212	0.679455	1.13091	0.343493	TC308550	AT2G38470.1	NM_129404	WRKY33 (WRKY DNA-binding protein 33); transcription factor	GO:0003700(transcription factor activity)|GO:0005634(nucleus)|GO:0006355(regulation of transcription, DNA-dependent)|GO:0042742(defense response to bacterium)|GO:0050832(defense response to fungus)
A_84_P21229	-0.0420702	-0.0769277	-0.0024296	-0.084028	0.0381677	-0.0175894	0.23567	0.0254973	-0.012006	-1.06463	-1.1264	-1.11671	TC287369	AT3G21420.1	NM_113037	oxidoreductase, 2OG-Fe(II) oxygenase family protein	GO:0005575(cellular_component)|GO:0008152(metabolic process)|GO:0016491(oxidoreductase activity)
A_84_P15304	-0.0429482	-0.0777285	0.267926	0.283836	-0.00359639	0.0525706	-1.04034	-0.637566	0.0315999	-1.35232	-0.482616	-1.48248	NP302771	AT1G65390.1	NM_202365	ATPP2-A5; carbohydrate binding	GO:0006952(defense response)|GO:0009507(chloroplast)|GO:0030246(carbohydrate binding)|GO:0031224(intrinsic to membrane)
A_84_P806643	-0.102466	-0.136963	0.292016	0.345779	-0.0199058	-0.146059	0.754776	0.1686	-0.0271929	-1.01392	-0.952749	-0.459557	TC302295	AT3G57520.2	NM_180384	ATSIP2 (ARABIDOPSIS THALIANA SEED IMBIBITION 2); hydrolase, hydrolyzing O-glycosyl compounds	GO:0004553(hydrolase activity, hydrolyzing O-glycosyl compounds)|GO:0005575(cellular_component)
A_84_P272980	-0.0592722	-0.0926197	-0.319248	-0.320944	0.0128307	-0.646021	-1.08033	-1.29258	-0.0228787	0.150791	-0.128572	-0.00228301		AT5G18080.1	NM_121813	auxin-responsive protein, putative	GO:0003674(molecular_function)|GO:0009733(response to auxin stimulus)
A_84_P17934	0.0475632	0.0782878	0.0878627	0.15572	-0.0285083	1.45217	0.778661	0.766345	0.0185193	0.853595	1.21345	0.201784	TC299085	AT5G04340.1	NM_120516	C2H2 (ZINC FINGER OF ARABIDOPSIS THALIANA 6); nucleic acid binding / transcription factor/ zinc ion binding	GO:0003676(nucleic acid binding)|GO:0003700(transcription factor activity)|GO:0005622(intracellular)|GO:0008270(zinc ion binding)
A_84_P18312	-0.138649	-0.168907	-0.698468	-0.253146	0.0136184	-0.122542	-1.50108	-0.365903	0.0196862	0.056974	0.390517	0.510661	TC281817	AT3G02020.1	NM_111068	aspartate kinase, lysine-sensitive, putative	GO:0004072(aspartate kinase activity)|GO:0009067(aspartate family amino acid biosynthetic process)
A_84_P19511	-0.0578441	-0.0879111	0.190239	-0.0652294	0.000386083	1.3497	0.0901816	0.576636	0.0141077	0.662029	1.22083	0.562842	TC291921	AT4G24380.1	NM_001036630	hypothetical protein	GO:0009257(10-formyltetrahydrofolate biosynthetic process)|GO:0009396(folic acid and derivative biosynthetic process)
A_84_P14635	0.0440437	0.0145258	-0.773941	-0.144562	0.0314294	-0.0182406	-1.1252	-0.0518077	0.0330257	0.398662	0.497641	0.224012	TC285214	AT1G02460.1	NM_100127	glycoside hydrolase family 28 protein / polygalacturonase (pectinase) family protein	GO:0004650(polygalacturonase activity)|GO:0005975(carbohydrate metabolic process)
A_84_P12228	-0.136867	-0.16573	-0.44557	-0.251836	-0.031944	-0.0270455	-0.991115	-0.423356	0.00041189	0.549599	0.6579	0.438833	TC281598	AT5G67280.1	NM_126128	RLK (RECEPTOR-LIKE KINASE); ATP binding / kinase/ protein serine/threonine kinase	GO:0004674(protein serine/threonine kinase activity)|GO:0005524(ATP binding)|GO:0006468(protein amino acid phosphorylation)|GO:0007169(transmembrane receptor protein tyrosine kinase signaling pathway)|GO:0009751(response to salicylic acid stimulus)|GO:0012505(endomembrane system)|GO:0016301(kinase activity)
A_84_P217688	-0.0253287	0.00329296	0.0434383	-0.0109914	0.014765	1.51825	0.862146	0.653466	0.00701186	1.11056	1.20508	0.770865	TC309749	AT1G76600.1	NM_106310	hypothetical protein	GO:0003674(molecular_function)|GO:0005634(nucleus)|GO:0005730(nucleolus)|GO:0006499(N-terminal protein myristoylation)
A_84_P540904	-0.0820579	-0.110658	0.181369	0.0368274	0.0295295	0.00976247	0.172567	0.107937	-0.0397058	-0.815546	-0.804005	-0.817396	TC282317	AT1G22882.1	NM_148482	hypothetical protein	GO:0005739(mitochondrion)
A_84_P94209	0.0158895	0.0434422	-0.182856	0.0108836	0.015543	0.633732	-0.495673	-0.019282	-0.0522191	0.559663	0.76157	0.226291	TC281808	AT4G02410.1	NM_116474	lectin protein kinase family protein	GO:0006468(protein amino acid phosphorylation)|GO:0012505(endomembrane system)|GO:0016301(kinase activity)
A_84_P140849	-0.0554042	-0.0281205	-0.0489179	-0.11026	-0.0368611	1.38426	0.814518	0.631103	0.0114822	0.921639	1.1501	0.500059	TC303062	AT1G32920.1	NM_103025	hypothetical protein	GO:0003674(molecular_function)|GO:0008150(biological_process)|GO:0012505(endomembrane system)
A_84_P859998	0.0867259	0.0594872	-0.610524	0.0431586	0.0326192	0.312624	-1.05807	-0.0553688	-0.0461731	0.621315	0.911665	1.12645	TC312512	AT3G54600.1	NM_115317	DJ-1 family protein	GO:0012505(endomembrane system)
A_84_P20454	-0.0222021	0.00476061	-0.544808	-0.17161	-0.00851176	0.159933	-1.04693	-0.229322	-0.0483563	0.11821	0.241505	0.358501	TC293787	AT4G23690.1	NM_118500	disease resistance-responsive family protein / dirigent family protein	GO:0003674(molecular_function)|GO:0006952(defense response)|GO:0009807(lignan biosynthetic process)|GO:0012505(endomembrane system)
A_84_P94789	0.183666	0.15793	0.354915	0.174985	-0.0174588	1.39841	0.0844948	0.896316	0.0151877	0.753694	1.11915	0.707017	TC306320	AT3G06890.1	NM_111569	hypothetical protein	GO:0003674(molecular_function)|GO:0005575(cellular_component)|GO:0008150(biological_process)
A_84_P113792	-0.0185555	-0.0436491	0.0366248	-0.20868	-0.0408162	0.474097	-0.0331021	0.264294	-0.0178898	0.70032	0.980895	0.660639	TC280971	AT3G03770.1	NM_111248	leucine-rich repeat transmembrane protein kinase, putative	GO:0004672(protein kinase activity)|GO:0004674(protein serine/threonine kinase activity)|GO:0005524(ATP binding)|GO:0006468(protein amino acid phosphorylation)|GO:0007169(transmembrane receptor protein tyrosine kinase signaling pathway)|GO:0012505(endomembrane system)
A_84_P11470	0.0352012	0.0599577	0.242192	0.0317104	0.0450413	1.60136	0.864242	0.900582	-0.0316699	1.10459	1.17705	0.743037	TC299781	AT1G66400.1	NM_105311	calmodulin-related protein, putative	GO:0005509(calcium ion binding)|GO:0005575(cellular_component)|GO:0008150(biological_process)
A_84_P757222	-0.0166389	0.0080127	-1.98401	-0.889371	-0.0222695	-0.921129	-1.56019	-0.350551	0.0303594	1.09347	1.45411	1.70598		AT2G16367.1		pseudo
A_84_P20462	0.0717342	0.047205	-0.352609	-0.395487	-0.0112752	1.6518	0.318984	0.0410703	0.0022469	1.20932	1.521	0.370406	TC295539	AT4G25490.1	NM_118681	CBF1 (C-REPEAT/DRE BINDING FACTOR 1); DNA binding / transcription activator/ transcription factor	GO:0003677(DNA binding)|GO:0003700(transcription factor activity)|GO:0005634(nucleus)|GO:0009409(response to cold)|GO:0009414(response to water deprivation)|GO:0009631(cold acclimation)|GO:0016563(transcription activator activity)
A_84_P19255	-0.10087	-0.124138	-0.450225	-0.231621	0.0113619	-0.234786	-1.02474	-0.4943	-0.0343019	0.369599	0.768518	0.854278	NP184432	AT1G01190.1	NM_100001	CYP78A8 (cytochrome P450, family 78, subfamily A, polypeptide 8); oxygen binding	GO:0006118(electron transport)|GO:0012505(endomembrane system)|GO:0019825(oxygen binding)
A_84_P17510	-0.20044	-0.177973	-0.0273863	-0.200935	-0.0655292	-0.0654822	0.666282	0.00950866	-0.000530198	-0.944115	-1.39425	-0.848834	TC283879	AT1G23870.1	NM_102235	ATTPS9 (Arabidopsis thaliana trehalose-phosphatase/synthase 9); transferase, transferring glycosyl groups / trehalose-phosphatase	GO:0004805(trehalose-phosphatase activity)|GO:0005992(trehalose biosynthetic process)|GO:0016757(transferase activity, transferring glycosyl groups)
A_84_P18274	0.0246675	0.00278745	-0.111156	-0.152799	-0.0189554	0.127503	-0.679517	-0.15691	0.0129167	0.162174	0.316938	0.299179	TC283645	AT2G39220.1	NM_129480	PLA IIB/PLP6 (Patatin-like protein 6); nutrient reservoir	GO:0006629(lipid metabolic process)|GO:0008152(metabolic process)|GO:0045735(nutrient reservoir activity)
A_84_P21946	-0.0625751	-0.0844388	-0.0414913	-0.347176	-0.00703357	1.92607	0.694188	0.804019	0.0234403	1.73256	1.74779	0.868331	TC294464	AT1G73540.1	NM_106012	ATNUDT21 (Arabidopsis thaliana Nudix hydrolase homolog 21); hydrolase	GO:0008150(biological_process)|GO:0009507(chloroplast)|GO:0016787(hydrolase activity)
A_84_P22952	-0.163683	-0.14191	-0.667124	-0.14138	-0.0458788	-0.108892	-1.28691	-0.261277	-0.0180281	0.286747	0.560475	0.89722	TC293367	AT2G46650.1	NM_130230	B5 #1 (cytochrome b5 family protein #1); heme binding / transition metal ion binding	GO:0005575(cellular_component)|GO:0006118(electron transport)|GO:0020037(heme binding)|GO:0046914(transition metal ion binding)
A_84_P164303	0.272687	0.293695	0.541572	0.555369	-0.032011	1.79432	0.793169	1.19883	-0.00324699	0.621746	1.48927	0.823223	TC287892	AT5G58680.1	NM_125255	armadillo/beta-catenin repeat family protein	GO:0005488(binding)|GO:0005575(cellular_component)|GO:0008150(biological_process)
A_84_P17929	-0.202158	-0.181324	-0.664787	-0.658222	0.00636777	-1.09971	-1.3904	-1.57675	0.0483815	-0.0559389	0.508353	-0.658214	TC286182	AT1G56600.1	NM_104537	ATGOLS2 (ARABIDOPSIS THALIANA GALACTINOL SYNTHASE 2); transferase, transferring glycosyl groups / transferase, transferring hexosyl groups	GO:0005575(cellular_component)|GO:0016051(carbohydrate biosynthetic process)|GO:0016757(transferase activity, transferring glycosyl groups)|GO:0016758(transferase activity, transferring hexosyl groups)
A_84_P21874	-0.0734309	-0.0931365	0.0198168	-0.0939829	-0.0626522	1.55456	0.860314	0.782977	0.0202142	1.12448	1.53721	0.69147	TC291890	AT1G27730.1	NM_102538	STZ (SALT TOLERANCE ZINC FINGER); nucleic acid binding / transcription factor/ zinc ion binding	GO:0003676(nucleic acid binding)|GO:0003700(transcription factor activity)|GO:0005634(nucleus)|GO:0006979(response to oxidative stress)|GO:0008270(zinc ion binding)|GO:0009409(response to cold)|GO:0009414(response to water deprivation)|GO:0009611(response to wounding)|GO:0009644(response to high light intensity)|GO:0009651(response to salt stress)|GO:0009737(response to abscisic acid stimulus)|GO…
A_84_P16493	0.0905482	0.108681	-0.392792	0.260956	0.0473285	0.109842	-0.353106	0.290685	0.0270212	1.37681	1.29457	1.30705	TC292948	AT3G22600.1	NM_113159	protease inhibitor/seed storage/lipid transfer protein (LTP) family protein	GO:0006869(lipid transport)|GO:0008289(lipid binding)|GO:0031225(anchored to membrane)
A_84_P728206	-0.0415601	-0.0237052	0.174557	0.294674	-0.0424252	-0.449834	0.78298	-0.390359	0.0284299	-0.538388	-2.01343	-0.616824	TC298881	DR368472
A_84_P860280	-0.138025	-0.120396	-0.327089	-0.159865	-0.0116794	0.487222	0.61749	0.447918	0.00929948	-0.591013	-1.04766	-0.955658	TC312666	AT1G69490.1	NM_105616	NAP (NAC-LIKE, ACTIVATED BY AP3/PI); transcription factor	GO:0003700(transcription factor activity)|GO:0005634(nucleus)|GO:0007275(multicellular organismal development)|GO:0009825(multidimensional cell growth)|GO:0009908(flower development)|GO:0010150(leaf senescence)
A_84_P19282	0.235589	0.218479	0.532988	0.373062	-0.0286154	0.0201217	0.0359167	-0.303386	-0.0393414	-1.0299	-1.69823	-0.895102	NP332578	AT3G02410.1	NM_111108	hypothetical protein	GO:0005575(cellular_component)|GO:0008150(biological_process)
A_84_P603792	0.097866	0.0809678	-0.287367	0.0961427	0.0324685	0.00633971	-0.617988	-0.225289	-0.0261677	0.564753	0.583611	0.529941	TC283516	AT5G22860.2	NM_122191	serine carboxypeptidase S28 family protein	GO:0006508(proteolysis)|GO:0008233(peptidase activity)|GO:0012505(endomembrane system)
A_84_P751365	-0.0323448	-0.0487419	-0.889992	-0.276939	0.0223259	0.0962636	-1.01918	-0.0885322	0.00607702	0.40262	0.648461	1.01648	TC285545	AT1G45201.1	NM_202246	hypothetical protein	GO:0003729(mRNA binding)|GO:0004806(triacylglycerol lipase activity)|GO:0006629(lipid metabolic process)|GO:0012505(endomembrane system)
A_84_P178164	-0.104692	-0.0945862	-1.33696	-1.00778	0.0203475	-0.153863	-1.22677	-0.820305	-0.018445	-0.601189	-0.278604	-0.341175	TC304463	AT1G70850.1	NM_001036188	MLP34 (MLP-LIKE PROTEIN 34)	GO:0003674(molecular_function)|GO:0005575(cellular_component)|GO:0006952(defense response)|GO:0009607(response to biotic stimulus)
A_84_P20495	0.0402127	0.0308762	0.531415	0.460727	0.0157123	0.167387	0.214178	0.357385	0.0076192	-0.7448	-0.759203	-0.500597	TC288439	AT4G32800.1	NM_119433	AP2 domain-containing transcription factor TINY, putative	GO:0003677(DNA binding)|GO:0003700(transcription factor activity)|GO:0005634(nucleus)|GO:0006355(regulation of transcription, DNA-dependent)
A_84_P561097	-0.0424092	-0.0496482	0.370366	0.146718	-0.0447892	1.67225	1.26495	0.935683	0.0266213	0.850838	1.21431	0.499557	TC304714	AT5G46295.1	NM_123999	hypothetical protein	GO:0003674(molecular_function)|GO:0008150(biological_process)
A_84_P609485	-0.014984	-0.00789683	-0.585013	-0.456606	0.00142712	-0.00846995	-0.434809	0.087562	-0.010354	0.462392	0.726258	0.00554235	TC301142	AT1G79520.1	NM_106600	cation efflux family protein	GO:0006812(cation transport)|GO:0008324(cation transmembrane transporter activity)|GO:0016020(membrane)
A_84_P784688	-0.0592441	-0.0655166	0.31213	0.223874	-8.04613e-05	-0.207677	0.517958	0.0270204	-0.0137691	-0.892956	-1.43734	-0.906123	TC291147	AT3G19680.1	NM_112858	hypothetical protein	GO:0009507(chloroplast)
A_84_P22607	-0.0532433	-0.0594062	0.312112	-0.0728384	-0.00639715	1.36523	1.19206	0.685366	-0.0315119	0.839635	0.969858	0.453616	TC308034	AT5G61600.1	NM_125553	ethylene-responsive element-binding family protein	GO:0003677(DNA binding)|GO:0003700(transcription factor activity)|GO:0005634(nucleus)|GO:0006355(regulation of transcription, DNA-dependent)
A_84_P18201	-0.0855571	-0.0911897	0.117028	-0.0504577	-0.0036184	-0.14534	0.224545	-0.20544	-0.0388777	-1.17743	-1.34048	-1.1025	TC292777	AT2G40940.1	NM_129658	ERS1 (ETHYLENE RESPONSE SENSOR 1); receptor	GO:0004673(protein histidine kinase activity)|GO:0004872(receptor activity)|GO:0010105(negative regulation of ethylene mediated signaling pathway)|GO:0016020(membrane)|GO:0051740(ethylene binding)
A_84_P14131	-0.304267	-0.309561	-0.0120448	-0.0346849	-0.0345423	-0.321546	0.60908	-0.372445	-0.00224691	-0.70305	-1.4397	-0.658744	TC303420	AT5G20250.1	NM_122032	DIN10 (DARK INDUCIBLE 10); hydrolase, hydrolyzing O-glycosyl compounds	GO:0004553(hydrolase activity, hydrolyzing O-glycosyl compounds)|GO:0007568(aging)|GO:0009416(response to light stimulus)|GO:0009744(response to sucrose stimulus)
A_84_P811403	-0.18912	-0.193637	0.0752569	0.0769895	0.0194824	-0.320388	0.667797	-0.348748	-0.0108325	-0.711038	-1.55347	-0.673873		TA29020_3702
A_84_P18514	0.0234532	0.0264605	-0.568623	-0.103518	0.0182023	0.182695	-0.635162	0.233707	-0.0163009	0.373015	0.631036	0.873644	TC284372	AT1G06000.1	NM_100480	UDP-glucoronosyl/UDP-glucosyl transferase family protein	GO:0005575(cellular_component)|GO:0008194(UDP-glycosyltransferase activity)|GO:0016757(transferase activity, transferring glycosyl groups)|GO:0051555(flavonol biosynthetic process)

## Sheet: WoA=Mp-3h
WoA=Mp-3h
Type	without aphid	M. cerasi	M. persicae	R. padi	without aphid	M. cerasi	M. persicae	R. padi	without aphid	M. cerasi	M. persicae	R. padi
Time	3h				6h				24h
Systematic	log2												TIGRID	At accession	GenbankAccession	Gene function	GO
A_84_P15254	-0.0653129	-0.220979	-0.114452	-0.396595	-0.0163545	0.932515	0.097645	0.175118	0.0126387	0.651658	0.877019	0.245723	TC294241	AT1G51700.1	NM_104048	ADOF1 (Arabidopsis dof zinc finger protein 1); DNA binding / transcription factor	GO:0003677(DNA binding)|GO:0003700(transcription factor activity)|GO:0005575(cellular_component)|GO:0045449(regulation of transcription)
A_84_P124252	0.0272812	-0.122973	0.0759112	-0.275761	0.000210444	1.13907	0.474431	0.487736	-0.0117024	0.563945	0.935721	0.135252	TC291327	AT2G41010.1	NM_129666	ATCAMBP25 (ARABIDOPSIS THALIANA CALMODULIN (CAM)-BINDING PROTEIN OF 25 KDA); calmodulin binding	GO:0005516(calmodulin binding)|GO:0005634(nucleus)|GO:0009414(response to water deprivation)|GO:0009651(response to salt stress)|GO:0010337(regulation of salicylic acid metabolic process)
A_84_P189284	-0.101897	-0.177363	-0.0544822	-0.0106681	0.0123979	-0.129726	0.301316	-0.0819672	0.00289978	-0.750635	-1.01675	-0.647705	TC307714	AT2G30930.1	NM_128646	hypothetical protein	GO:0003674(molecular_function)|GO:0008150(biological_process)
A_84_P869273	0.0224264	-0.232358	0.069701	-0.310831	0.11679	2.10891	1.1897	1.19712	0.0355996	1.3256	1.42098	0.724357	TC291661	AT3G44260.1	NM_114294	CCR4-NOT transcription complex protein, putative	GO:0004540(ribonuclease activity)|GO:0005634(nucleus)|GO:0009451(RNA modification)
A_84_P13976	-0.0990208	0.0213248	-0.0528645	-0.089974	-0.0285813	-0.27762	0.616772	-0.431136	-0.00154033	-0.148482	-0.660413	-0.0487619	TC296982	AT5G19120.1	NM_121917	aspartic-type endopeptidase/ pepsin A	GO:0004190(aspartic-type endopeptidase activity)|GO:0004194(pepsin A activity)|GO:0006508(proteolysis)|GO:0012505(endomembrane system)
A_84_P522306	0.377297	-0.0919436	0.331697	-0.298937	-0.0711446	2.18191	0.760506	1.16965	-0.0707451	1.3933	2.01481	0.834906	TC290940	AT1G27820.1	NM_102547	CCR4-NOT transcription complex protein, putative	GO:0004540(ribonuclease activity)|GO:0005634(nucleus)|GO:0009451(RNA modification)
A_84_P834641	0.225702	-0.156005	0.271239	-0.10006	0.00733371	1.86782	1.13088	0.893938	0.0269111	1.59142	2.17064	1.19293	TC299015	AT3G29000.1	NM_113821	calcium-binding EF hand family protein	GO:0005509(calcium ion binding)|GO:0008150(biological_process)|GO:0012505(endomembrane system)
A_84_P12029	0.0275591	-0.117769	0.0724932	0.192035	-0.0306871	-0.581517	0.345818	-0.708859	0.0264531	-0.924572	-1.68371	-0.839204	TC295606	AT4G37220.1	NM_119885	stress-responsive protein, putative	GO:0003674(molecular_function)|GO:0005575(cellular_component)|GO:0006950(response to stress)
A_84_P20728	-0.177074	-0.00165134	-0.133439	0.144157	-0.0301963	-0.144063	0.381842	0.89382	-0.0104207	-1.97777	-1.60621	-1.41447	TC288237	AT5G64750.1	NM_125871	ABR1 (ABA REPRESSOR1); DNA binding / transcription factor	GO:0003677(DNA binding)|GO:0003700(transcription factor activity)|GO:0005634(nucleus)|GO:0006355(regulation of transcription, DNA-dependent)|GO:0006970(response to osmotic stress)|GO:0009737(response to abscisic acid stimulus)|GO:0009749(response to glucose stimulus)|GO:0009788(negative regulation of abscisic acid mediated signaling)
A_84_P810552	-0.110268	-0.264471	-0.0673216	-0.364785	0.109863	0.480081	1.17683	0.391825	-0.0188075	-0.925616	-1.37479	-0.351198	TC305629	AT3G48360.1	NM_114697	BT2 (BTB AND TAZ DOMAIN PROTEIN 2); protein binding / transcription factor/ transcription regulator	GO:0003700(transcription factor activity)|GO:0005515(protein binding)|GO:0005634(nucleus)|GO:0030528(transcription regulator activity)|GO:0051973(positive regulation of telomerase activity)
A_84_P17934	0.0475632	0.0782878	0.0878627	0.15572	-0.0285083	1.45217	0.778661	0.766345	0.0185193	0.853595	1.21345	0.201784	TC299085	AT5G04340.1	NM_120516	C2H2 (ZINC FINGER OF ARABIDOPSIS THALIANA 6); nucleic acid binding / transcription factor/ zinc ion binding	GO:0003676(nucleic acid binding)|GO:0003700(transcription factor activity)|GO:0005622(intracellular)|GO:0008270(zinc ion binding)
A_84_P14106	-0.0103478	-0.118326	0.029878	-0.109467	0.0375911	1.19985	0.429744	0.649855	-0.0143593	-0.0527303	0.524846	-0.0663806	TC309184	AT5G64310.1	NM_125827	AGP1 (ARABINOGALACTAN-PROTEIN 1)	GO:0003674(molecular_function)|GO:0031225(anchored to membrane)
A_84_P10638	-0.275619	-0.205309	-0.23552	-0.147712	-0.000514584	-0.185516	0.461325	-0.370702	0.0246644	-0.87902	-1.60717	-1.02655	TC307290	AT1G11260.1	NM_100998	STP1 (SUGAR TRANSPORTER 1); carbohydrate transmembrane transporter/ sugar:hydrogen ion symporter	GO:0003674(molecular_function)|GO:0005351(sugar:hydrogen symporter activity)|GO:0005575(cellular_component)|GO:0006810(transport)|GO:0008643(carbohydrate transport)|GO:0009735(response to cytokinin stimulus)|GO:0009825(multidimensional cell growth)|GO:0015144(carbohydrate transmembrane transporter activity)|GO:0016020(membrane)
A_84_P21229	-0.0420702	-0.0769277	-0.0024296	-0.084028	0.0381677	-0.0175894	0.23567	0.0254973	-0.012006	-1.06463	-1.1264	-1.11671	TC287369	AT3G21420.1	NM_113037	oxidoreductase, 2OG-Fe(II) oxygenase family protein	GO:0005575(cellular_component)|GO:0008152(metabolic process)|GO:0016491(oxidoreductase activity)
A_84_P761881	-0.016696	-0.0801097	-0.0561612	-0.0425778	0.00480684	1.3574	0.541223	0.437871	0.0503858	1.11294	1.26079	0.62149	TC300375	AT3G04640.2	NM_001084637	glycine-rich protein	GO:0003674(molecular_function)|GO:0008150(biological_process)|GO:0031225(anchored to membrane)
A_84_P12978	-0.00193727	-0.498709	0.0371163	-0.197015	0.0159836	-0.0694586	0.858779	0.000594264	0.0189769	-0.457365	-0.68294	-0.525151	TC287254	AT5G01810.1	NM_001036743	CIPK15 (CBL-INTERACTING PROTEIN KINASE 15); kinase	GO:0004672(protein kinase activity)|GO:0009738(abscisic acid mediated signaling)|GO:0009788(negative regulation of abscisic acid mediated signaling)|GO:0016301(kinase activity)
A_84_P756652	-0.00389539	-0.751133	0.0350122	-0.603658	0.0734053	1.6652	1.27516	0.881568	0.0499504	1.03702	1.01337	0.335718	TC297539	AT2G35710.3	NM_201879	glycogenin glucosyltransferase (glycogenin)-related	GO:0009058(biosynthetic process)|GO:0012505(endomembrane system)|GO:0016051(carbohydrate biosynthetic process)|GO:0016757(transferase activity, transferring glycosyl groups)|GO:0016758(transferase activity, transferring hexosyl groups)
A_84_P17343	0.052921	0.117669	0.0877152	-0.0704976	0.0162071	2.52171	1.28421	1.78569	0.000944663	1.18786	1.84216	1.56434	TC293511	AT2G44840.1	NM_130048	ATERF13/EREBP (ETHYLENE-RESPONSIVE ELEMENT BINDING FACTOR 13); DNA binding / transcription factor	GO:0003677(DNA binding)|GO:0003700(transcription factor activity)|GO:0005634(nucleus)|GO:0006355(regulation of transcription, DNA-dependent)|GO:0009873(ethylene mediated signaling pathway)
A_84_P850547	-0.0413566	0.406309	-0.075278	0.231225	0.0633841	-0.0722448	0.887255	-0.393705	0.0561004	-0.0383835	-0.870059	-0.198787	TC305216	TA29936_3702
A_84_P784166	0.0618593	-0.602016	0.0945039	-0.534743	-0.0166566	1.65339	0.737995	0.904697	0.0201348	0.0128635	0.713102	-0.411325	TC283689	AT5G45340.2	NM_123902	CYP707A3 (cytochrome P450, family 707, subfamily A, polypeptide 3); oxygen binding	GO:0009414(response to water deprivation)|GO:0009639(response to red or far red light)|GO:0010295((+)-abscisic acid 8'-hydroxylase activity)|GO:0012505(endomembrane system)|GO:0019825(oxygen binding)|GO:0046345(abscisic acid catabolic process)
A_84_P13393	0.129859	-0.157569	0.158535	-0.0564899	0.0172763	1.34052	0.330362	0.608178	-0.0172231	0.490759	1.02861	0.209322	TC297280	AT1G66090.1	NM_105280	disease resistance protein (TIR-NBS class), putative	GO:0000166(nucleotide binding)|GO:0004888(transmembrane receptor activity)|GO:0005524(ATP binding)|GO:0006952(defense response)|GO:0009507(chloroplast)|GO:0017111(nucleoside-triphosphatase activity)|GO:0031224(intrinsic to membrane)
A_84_P54170	0.032518	-0.241833	0.0602331	-0.185993	0.0116932	1.17514	0.682861	0.632536	0.00277316	0.485907	0.934839	0.393538	TC297146	AT3G57450.1	NM_115605	hypothetical protein	GO:0003674(molecular_function)|GO:0008150(biological_process)
A_84_P127291	0.058405	-0.14017	0.0321792	0.206261	-0.00558169	-0.0752128	0.249529	-0.120102	-0.0303494	-0.809773	-1.14506	-0.827244	TC295964	AT5G62860.1	NM_125681	F-box family protein-related	GO:0003674(molecular_function)|GO:0008150(biological_process)
A_84_P78199	0.0440931	-0.118748	0.0690864	-0.0294962	-0.0198485	-0.150776	0.749235	-0.09088	0.0224137	-1.02864	-1.45933	-1.20438	TC297634	AT5G25240.1	NM_122433	hypothetical protein	GO:0003674(molecular_function)|GO:0005575(cellular_component)|GO:0008150(biological_process)
A_84_P146199	0.00409445	-0.389608	0.0275494	0.0649038	0.00128458	-0.429428	0.643898	-0.195314	0.0416815	-0.881776	-1.22198	-0.709669	TC292815	AT5G05440.1	NM_120626	hypothetical protein	GO:0003674(molecular_function)|GO:0005575(cellular_component)|GO:0006952(defense response)|GO:0009607(response to biotic stimulus)
A_84_P811808	-0.0756945	0.51882	-0.0526323	0.474012	0.00469198	-0.04232	-0.547023	0.093047	0.000436442	-0.642799	-0.759842	0.443219	TC288273	AT3G12145.1	NM_202562	FLR1 (FLOR1); enzyme inhibitor	GO:0004857(enzyme inhibitor activity)|GO:0005575(cellular_component)|GO:0008134(transcription factor binding)|GO:0008150(biological_process)
A_84_P272600	0.100308	0.145753	0.122748	-0.446615	0.0394404	3.76857	2.20113	2.60051	0.0571446	2.53793	3.37745	2.66256	TC295295	AT5G21960.1	NM_147879	AP2 domain-containing transcription factor, putative	GO:0003677(DNA binding)|GO:0003700(transcription factor activity)|GO:0005634(nucleus)|GO:0006355(regulation of transcription, DNA-dependent)
A_84_P21946	-0.0625751	-0.0844388	-0.0414913	-0.347176	-0.00703357	1.92607	0.694188	0.804019	0.0234403	1.73256	1.74779	0.868331	TC294464	AT1G73540.1	NM_106012	ATNUDT21 (Arabidopsis thaliana Nudix hydrolase homolog 21); hydrolase	GO:0008150(biological_process)|GO:0009507(chloroplast)|GO:0016787(hydrolase activity)
A_84_P12763	0.0181299	-0.197513	0.0374886	-0.0900472	-0.021061	-0.421895	-0.134548	-0.525339	-0.00325843	-1.06303	-1.36122	-0.982468	NP163231	AT3G50560.1	NM_114916	short-chain dehydrogenase/reductase (SDR) family protein	GO:0008152(metabolic process)|GO:0016491(oxidoreductase activity)
A_84_P811890	0.207662	-0.393629	0.1886	0.141983	-0.0228939	0.256149	0.98017	0.302006	-0.00374456	-0.785818	-0.991035	-0.82555	TC288545	AT4G08950.1	NM_116964	phosphate-responsive protein, putative (EXO)	GO:0003674(molecular_function)|GO:0008150(biological_process)|GO:0009505(plant-type cell wall)
A_84_P851531	-0.160237	-0.0893562	-0.176476	-0.0850421	0.0120034	-0.022741	0.612534	-0.243279	0.00265056	-0.480001	-1.07614	-0.496808	TC306482	AT4G24230.5	NM_001084972	ACBP3 (ACYL-COA-BINDING DOMAIN 3); acyl-CoA binding	GO:0000062(acyl-CoA binding)|GO:0005576(extracellular region)|GO:0015908(fatty acid transport)
A_84_P21530	-0.186664	-0.431886	-0.202754	-0.150997	0.0178179	-0.169168	0.467202	-0.160455	-0.0177992	-1.00671	-1.39261	-0.668041	TC308082	AT5G14120.1	NM_121416	nodulin family protein	GO:0012505(endomembrane system)
A_84_P17009	0.0854703	-0.237303	0.0696809	-0.209662	-0.0789664	1.01011	0.00286698	0.194759	0.00679813	0.456904	0.851047	0.404099	TC292861	AT1G20823.1	NM_101935	zinc finger (C3HC4-type RING finger) family protein	GO:0005515(protein binding)|GO:0008270(zinc ion binding)
A_84_P529724	-0.049772	0.10049	-0.0346907	-0.183114	0.00718959	0.125223	0.949176	-0.0164475	0.0142255	-0.831106	-0.914808	-0.568539		AT3G20340.1	NM_112925	hypothetical protein	GO:0003674(molecular_function)|GO:0005575(cellular_component)|GO:0006499(N-terminal protein myristoylation)
A_84_P18787	-0.0727824	-0.207796	-0.0877346	-0.0733628	-0.05966	-0.245447	0.482494	-0.263005	0.0420282	-0.41718	-0.73018	-0.443732	TC305590	AT5G52250.1	NM_124604	transducin family protein / WD-40 repeat family protein	GO:0000166(nucleotide binding)|GO:0005834(heterotrimeric G-protein complex)|GO:0010114(response to red light)|GO:0010218(response to far red light)|GO:0010224(response to UV-B)
A_84_P21370	0.058138	0.267075	0.0717099	0.19797	0.0267524	0.547313	-0.759552	-0.144515	-0.021085	1.16933	1.41735	0.993117	TC286490	AT4G12320.1	NM_117302	CYP706A6 (cytochrome P450, family 706, subfamily A, polypeptide 6); oxygen binding	GO:0005575(cellular_component)|GO:0006118(electron transport)|GO:0019825(oxygen binding)
A_84_P817892	0.0481967	-0.330102	0.0614721	0.182357	-0.000591944	-0.412235	0.438989	-0.307045	-0.0368162	-0.940979	-1.33088	-0.704136	TC292815	AT5G05440.1	NM_120626	hypothetical protein	GO:0003674(molecular_function)|GO:0005575(cellular_component)|GO:0006952(defense response)|GO:0009607(response to biotic stimulus)
A_84_P12570	0.0165129	0.0702761	0.0295052	0.151888	0.0282311	-0.186176	0.481762	-0.0693636	0.0178385	-0.641017	-1.14882	-0.460402	TC282498	AT2G28120.1	NM_128372	nodulin family protein	GO:0006499(N-terminal protein myristoylation)|GO:0012505(endomembrane system)
A_84_P863159	-0.0245615	0.432321	-0.0117321	0.535155	0.0386666	0.385764	-0.707533	0.0356598	-0.0105351	0.66824	0.896701	1.03692	TC314193	AT2G36880.2	NM_001124986	MAT3 (METHIONINE ADENOSYLTRANSFERASE 3); methionine adenosyltransferase	GO:0004478(methionine adenosyltransferase activity)|GO:0005575(cellular_component)|GO:0006556(S-adenosylmethionine biosynthetic process)
A_84_P843330	0.345107	-0.218815	0.355674	-0.387444	-0.00220809	1.83103	0.380554	0.880305	0.0115099	1.26683	1.74039	0.229503	NP335312	NP335312
A_84_P17864	0.0176613	0.854165	0.0273426	0.139731	-0.0117417	0.0716509	-1.22777	-0.583678	-0.00262556	-0.799194	-0.368141	0.0506536	TC283458	AT5G58860.1	NM_125276	CYP86A1 (cytochrome P450, family 86, subfamily A, polypeptide 1); oxygen binding	GO:0006631(fatty acid metabolic process)|GO:0008393(fatty acid (omega-1)-hydroxylase activity)|GO:0010345(suberin biosynthetic process)|GO:0012505(endomembrane system)|GO:0019825(oxygen binding)
A_84_P255030	0.0910226	-0.528141	0.100229	-0.134072	-0.00057169	-0.0861512	0.464687	0.0456419	-0.0194113	-1.01733	-1.12967	-1.10607	TC281544	AT4G13340.1	NM_117407	leucine-rich repeat family protein / extensin family protein	GO:0005199(structural constituent of cell wall)|GO:0005515(protein binding)|GO:0009505(plant-type cell wall)
A_84_P506004	-0.0454241	0.365054	-0.0538014	0.233502	-0.0164232	-0.027407	-0.931849	-0.464602	0.0199276	0.73177	0.94576	0.64189	TC296045	AT5G01790.1	NM_120257	hypothetical protein	GO:0003674(molecular_function)|GO:0008150(biological_process)|GO:0009507(chloroplast)
A_84_P846684	0.0295656	0.418116	0.0371462	0.514402	0.0377999	0.622183	-0.711801	0.413494	-0.10329	0.648026	0.823377	0.774327	TC297663	AT4G01070.1	NM_116337	GT72B1; UDP-glucosyltransferase/ UDP-glycosyltransferase/ transferase, transferring glycosyl groups	GO:0006805(xenobiotic metabolic process)|GO:0008194(UDP-glycosyltransferase activity)|GO:0009636(response to toxin)|GO:0016757(transferase activity, transferring glycosyl groups)|GO:0035251(UDP-glucosyltransferase activity)|GO:0042178(xenobiotic catabolic process)
A_84_P140849	-0.0554042	-0.0281205	-0.0489179	-0.11026	-0.0368611	1.38426	0.814518	0.631103	0.0114822	0.921639	1.1501	0.500059	TC303062	AT1G32920.1	NM_103025	hypothetical protein	GO:0003674(molecular_function)|GO:0008150(biological_process)|GO:0012505(endomembrane system)
A_84_P12143	0.13074	-0.599961	0.136407	-0.44604	0.0375713	1.67642	0.672546	1.01257	0.0133993	-0.0803461	0.693755	-0.512615	TC283689	AT5G45340.1	NM_180805	CYP707A3 (cytochrome P450, family 707, subfamily A, polypeptide 3); oxygen binding	GO:0009414(response to water deprivation)|GO:0009639(response to red or far red light)|GO:0010295((+)-abscisic acid 8'-hydroxylase activity)|GO:0012505(endomembrane system)|GO:0019825(oxygen binding)|GO:0046345(abscisic acid catabolic process)
A_84_P855484	-0.20292	-0.0602886	-0.208036	-0.219833	-0.0143378	-0.222123	0.676671	-0.435826	-0.00270978	-0.163756	-0.576348	-0.023813	TC309871	TC309871
A_84_P503480	-0.102774	0.0563432	-0.101602	-0.570715	-0.0183086	2.00117	1.25559	1.32503	-0.019109	0.754471	1.31029	0.0358323	TC308859	AT5G45630.1	NM_123931	hypothetical protein	GO:0003674(molecular_function)|GO:0005575(cellular_component)|GO:0008150(biological_process)
A_84_P97916	0.0965873	-0.268064	0.0976855	-0.497818	0.040078	2.65358	1.28173	1.55858	0.0308499	0.848347	1.45689	0.300416	TC282975	AT4G29780.1	NM_119124	hypothetical protein	GO:0005575(cellular_component)
A_84_P23478	0.102741	-0.0554153	0.102561	0.0140672	0.0225174	0.913926	0.311469	0.508681	-0.0141127	0.48831	1.15256	0.405802	TC296906	AT5G41750.1	NM_123540	disease resistance protein (TIR-NBS-LRR class), putative	GO:0000166(nucleotide binding)|GO:0004888(transmembrane receptor activity)|GO:0005515(protein binding)|GO:0005524(ATP binding)|GO:0006952(defense response)|GO:0017111(nucleoside-triphosphatase activity)|GO:0031224(intrinsic to membrane)

## Sheet: WoA=Rp-3h
WoA=Rp-3h
Type	without aphid	M. cerasi	M. persicae	R. padi	without aphid	M. cerasi	M. persicae	R. padi	without aphid	M. cerasi	M. persicae	R. padi
Time	3h				6h				24h
Systematic	log2												TIGRID	At accession	GenbankAccession	Gene function	GO
A_84_P19758	0.28225	0.339021	0.0791804	0.233595	0.0132368	0.448149	-0.364861	0.64548	-0.0460297	0.792616	0.985334	-0.922637	TC299264	AT5G59310.1	NM_125322	LTP4 (LIPID TRANSFER PROTEIN 4); lipid binding	GO:0006869(lipid transport)|GO:0008289(lipid binding)|GO:0009737(response to abscisic acid stimulus)|GO:0012505(endomembrane system)
A_84_P824302	-0.00737599	-0.258018	0.130882	-0.0550811	-0.03242	0.0817259	0.0166733	-0.0532139	0.01108	-0.779245	-1.09694	-0.859344	TC308152	AT4G29310.1	NM_119076	hypothetical protein	GO:0005575(cellular_component)
A_84_P862479	-0.0905315	-0.12725	-0.165633	-0.0437246	0.0496488	2.01707	0.777678	1.36789	0.0137147	1.28236	1.6042	1.46885	TC313942	BE523647
A_84_P818622	-0.0258758	-0.128533	-0.823626	0.0201213	0.0520639	0.00445768	-0.520967	0.168918	-0.00753145	1.25319	1.29347	1.33378	TC292948	AT3G22600.1	NM_113159	protease inhibitor/seed storage/lipid transfer protein (LTP) family protein	GO:0006869(lipid transport)|GO:0008289(lipid binding)|GO:0031225(anchored to membrane)
A_84_P844671	-0.122187	-0.0822158	0.0126442	-0.0781218	-0.036354	-0.350358	0.572705	-0.342337	0.026886	-0.593341	-1.09926	-0.274382	TC283876	AT4G38470.1	NM_120008	protein kinase family protein	GO:0004672(protein kinase activity)|GO:0004712(protein serine/threonine/tyrosine kinase activity)|GO:0006468(protein amino acid phosphorylation)|GO:0008152(metabolic process)
A_84_P859998	0.0867259	0.0594872	-0.610524	0.0431586	0.0326192	0.312624	-1.05807	-0.0553688	-0.0461731	0.621315	0.911665	1.12645	TC312512	AT3G54600.1	NM_115317	DJ-1 family protein	GO:0012505(endomembrane system)
A_84_P847741	0.100409	0.199848	-0.101044	0.14365	0.050365	0.346317	-0.380921	0.225039	0.0477532	0.954672	1.40448	0.962036	TC300093	TC300093
A_84_P21229	-0.0420702	-0.0769277	-0.0024296	-0.084028	0.0381677	-0.0175894	0.23567	0.0254973	-0.012006	-1.06463	-1.1264	-1.11671	TC287369	AT3G21420.1	NM_113037	oxidoreductase, 2OG-Fe(II) oxygenase family protein	GO:0005575(cellular_component)|GO:0008152(metabolic process)|GO:0016491(oxidoreductase activity)
A_84_P541401	0.315418	0.181387	-1.24512	0.355642	0.016559	0.522481	-1.8685	0.0954837	-0.101935	0.58441	1.10443	0.956884	TC292644	AT4G18425.1	NM_117955	hypothetical protein	GO:0003674(molecular_function)|GO:0005575(cellular_component)|GO:0008150(biological_process)
A_84_P20890	-0.0173745	0.0314941	0.32056	-0.055759	-0.000936688	1.85678	0.845542	0.861776	-0.00274499	1.36984	1.61924	1.02781	TC294166	AT1G72920.1	NM_105950	disease resistance protein (TIR-NBS class), putative	GO:0004888(transmembrane receptor activity)|GO:0006952(defense response)|GO:0031224(intrinsic to membrane)
A_84_P788437	0.0458648	-0.0723284	0.303423	0.0099464	0.00465094	1.40572	0.987471	0.720007	0.0468183	0.896494	1.17407	0.644207	TC312057	AT1G35210.1	NM_103219	hypothetical protein	GO:0003674(molecular_function)|GO:0008150(biological_process)|GO:0009507(chloroplast)
A_84_P21530	-0.186664	-0.431886	-0.202754	-0.150997	0.0178179	-0.169168	0.467202	-0.160455	-0.0177992	-1.00671	-1.39261	-0.668041	TC308082	AT5G14120.1	NM_121416	nodulin family protein	GO:0012505(endomembrane system)
A_84_P18201	-0.0855571	-0.0911897	0.117028	-0.0504577	-0.0036184	-0.14534	0.224545	-0.20544	-0.0388777	-1.17743	-1.34048	-1.1025	TC292777	AT2G40940.1	NM_129658	ERS1 (ETHYLENE RESPONSE SENSOR 1); receptor	GO:0004673(protein histidine kinase activity)|GO:0004872(receptor activity)|GO:0010105(negative regulation of ethylene mediated signaling pathway)|GO:0016020(membrane)|GO:0051740(ethylene binding)
A_84_P18215	0.210025	0.340035	0.333512	0.244959	0.0138991	1.05936	-0.0426701	0.750368	0.0500615	1.46953	1.75379	1.10218	TC284857	AT2G32290.1	NM_128788	BAM6/BMY5 (BETA-AMYLASE 6); beta-amylase	GO:0000272(polysaccharide catabolic process)|GO:0005575(cellular_component)|GO:0005975(carbohydrate metabolic process)|GO:0016161(beta-amylase activity)|GO:0030244(cellulose biosynthetic process)
A_84_P21501	-0.0287678	0.0476045	-0.328321	-0.0636672	-0.0216763	0.970595	0.354241	0.27526	-0.0342861	0.536911	1.24797	0.0578914	TC285680	AT5G05410.1	NM_120623	DREB2A (DRE-BINDING PROTEIN 2A); DNA binding / transcription activator/ transcription factor	GO:0003677(DNA binding)|GO:0003700(transcription factor activity)|GO:0005634(nucleus)|GO:0006355(regulation of transcription, DNA-dependent)|GO:0009408(response to heat)|GO:0009414(response to water deprivation)|GO:0010224(response to UV-B)|GO:0010286(heat acclimation)|GO:0016563(transcription activator activity)|GO:0042542(response to hydrogen peroxide)
A_84_P10518	0.0702347	-0.421887	0.184371	0.0366024	-0.0122158	-0.641513	0.733246	-0.308977	-0.0239211	-1.41277	-2.20936	-1.32913	TC285786	AT1G50040.1	NM_103892	hypothetical protein	GO:0003674(molecular_function)|GO:0008150(biological_process)|GO:0009507(chloroplast)
A_84_P20470	0.198378	-0.157378	0.66773	0.231397	0.00744019	0.386047	0.761207	0.128807	-0.0427052	-1.06275	-1.40646	-1.35675	TC288345	AT1G21910.1	NM_102039	AP2 domain-containing transcription factor family protein	GO:0003677(DNA binding)|GO:0003700(transcription factor activity)|GO:0005634(nucleus)|GO:0006355(regulation of transcription, DNA-dependent)
A_84_P15194	0.263073	0.664415	-0.73986	0.295941	0.038604	1.18863	-0.123132	1.14067	0.0106173	0.0332189	-0.14707	1.58238	TC299585	AT1G54020.1	NM_179474	myrosinase-associated protein, putative	GO:0004091(carboxylesterase activity)|GO:0006629(lipid metabolic process)|GO:0012505(endomembrane system)
A_84_P237173	-0.280254	-0.244582	-0.193119	-0.312048	-0.0112318	0.692769	0.880208	1.83854	-0.0324078	-1.45969	-0.984807	-1.44818	TC301449	AT1G10585.1	NM_100934	transcription factor	GO:0003700(transcription factor activity)|GO:0005634(nucleus)|GO:0045449(regulation of transcription)
A_84_P861193	-0.105664	0.0275564	-0.473623	-0.0740443	0.000550268	0.204179	-0.740273	0.240854	0.0135563	0.461514	0.791714	1.05598	TC313242	AT1G06000.1	NM_100480	UDP-glucoronosyl/UDP-glucosyl transferase family protein	GO:0005575(cellular_component)|GO:0008194(UDP-glycosyltransferase activity)|GO:0016757(transferase activity, transferring glycosyl groups)|GO:0051555(flavonol biosynthetic process)
A_84_P122462	-0.0326843	-0.18329	-0.427233	-0.0638325	0.000915831	-1.25768	-0.714725	-1.18751	0.0114102	-1.75542	-2.02207	-1.61589	TC298630	AT5G53980.1	NM_124777	ATHB52 (ARABIDOPSIS THALIANA HOMEOBOX PROTEIN 52); transcription factor	GO:0003700(transcription factor activity)|GO:0005634(nucleus)|GO:0006355(regulation of transcription, DNA-dependent)
A_84_P15931	0.0519083	0.0100276	0.419844	0.0209069	0.00472334	1.84027	0.777819	0.885133	0.0220179	0.963813	1.40768	0.616977	TC293666	AT5G47230.1	NM_124094	ERF5 (ETHYLENE RESPONSIVE ELEMENT BINDING FACTOR 5); DNA binding / transcription activator/ transcription factor	GO:0003677(DNA binding)|GO:0003700(transcription factor activity)|GO:0005634(nucleus)|GO:0006355(regulation of transcription, DNA-dependent)|GO:0009409(response to cold)|GO:0009873(ethylene mediated signaling pathway)|GO:0016563(transcription activator activity)
A_84_P787999	0.00878643	0.443781	0.458056	0.0377255	0.00447978	-0.273722	0.576334	-0.445528	0.00496574	-0.818016	-1.44474	-1.09326	TC299061	AT3G29370.1	NM_113862	hypothetical protein	GO:0003674(molecular_function)|GO:0008150(biological_process)
A_84_P219668	-0.0252747	0.0860789	0.221357	0.0022022	-0.0546577	1.29544	0.643116	0.479214	-0.0124668	0.915077	1.16167	0.431585	TC300375	AT3G04640.1	NM_111336	glycine-rich protein	GO:0003674(molecular_function)|GO:0008150(biological_process)|GO:0031225(anchored to membrane)
A_84_P16913	-0.0517686	-0.393069	-0.220301	-0.0244719	-0.0417456	-0.483428	0.258901	-0.174209	-0.0249412	-0.598113	-1.67983	-0.503202	TC290192	AT5G57550.1	NM_125136	XTR3 (XYLOGLUCAN ENDOTRANSGLYCOSYLASE 3); hydrolase, acting on glycosyl bonds	GO:0005618(cell wall)|GO:0009832(plant-type cell wall biogenesis)|GO:0012505(endomembrane system)|GO:0016762(xyloglucan:xyloglucosyl transferase activity)|GO:0016798(hydrolase activity, acting on glycosyl bonds)|GO:0048046(apoplast)
A_84_P761881	-0.016696	-0.0801097	-0.0561612	-0.0425778	0.00480684	1.3574	0.541223	0.437871	0.0503858	1.11294	1.26079	0.62149	TC300375	AT3G04640.2	NM_001084637	glycine-rich protein	GO:0003674(molecular_function)|GO:0008150(biological_process)|GO:0031225(anchored to membrane)
A_84_P191534	0.0205892	-0.104482	-0.145091	-0.00330984	0.00870023	0.00743118	-0.821278	-0.180992	0.0342245	0.372903	0.626592	0.508716	TC292310	AT2G37580.1	NM_129313	zinc finger (C3HC4-type RING finger) family protein	GO:0005515(protein binding)|GO:0008270(zinc ion binding)|GO:0016757(transferase activity, transferring glycosyl groups)
A_84_P16097	-0.0170693	-0.159263	0.0661153	0.0065721	-0.0407502	1.0789	0.571953	0.669114	0.0515759	0.680585	1.23406	0.629307	TC288702	AT1G24140.1	NM_102260	matrixin family protein	GO:0004222(metalloendopeptidase activity)|GO:0006508(proteolysis)|GO:0031225(anchored to membrane)
A_84_P167173	-0.241945	0.353121	-0.925589	-0.218755	4.33782e-05	0.461762	-1.77767	-1.41321	0.0277173	1.13981	1.32785	0.568856	TC295297	AT4G25480.1	NM_118680	DREB1A (DEHYDRATION RESPONSE ELEMENT B1A); DNA binding / transcription activator/ transcription factor	GO:0003677(DNA binding)|GO:0003700(transcription factor activity)|GO:0005634(nucleus)|GO:0006355(regulation of transcription, DNA-dependent)|GO:0009409(response to cold)|GO:0009414(response to water deprivation)|GO:0009631(cold acclimation)|GO:0016563(transcription activator activity)
A_84_P816137	0.0202448	0.0950743	-0.436247	0.0425482	0.00905399	-0.393705	-1.28617	-0.281449	0.015822	-0.153597	-0.0954257	0.462383	NP237696	AT5G64080.2	NM_203260	protease inhibitor/seed storage/lipid transfer protein (LTP) family protein	GO:0006869(lipid transport)|GO:0008289(lipid binding)|GO:0031225(anchored to membrane)
A_84_P22952	-0.163683	-0.14191	-0.667124	-0.14138	-0.0458788	-0.108892	-1.28691	-0.261277	-0.0180281	0.286747	0.560475	0.89722	TC293367	AT2G46650.1	NM_130230	B5 #1 (cytochrome b5 family protein #1); heme binding / transition metal ion binding	GO:0005575(cellular_component)|GO:0006118(electron transport)|GO:0020037(heme binding)|GO:0046914(transition metal ion binding)
A_84_P860280	-0.138025	-0.120396	-0.327089	-0.159865	-0.0116794	0.487222	0.61749	0.447918	0.00929948	-0.591013	-1.04766	-0.955658	TC312666	AT1G69490.1	NM_105616	NAP (NAC-LIKE, ACTIVATED BY AP3/PI); transcription factor	GO:0003700(transcription factor activity)|GO:0005634(nucleus)|GO:0007275(multicellular organismal development)|GO:0009825(multidimensional cell growth)|GO:0009908(flower development)|GO:0010150(leaf senescence)
A_84_P245045	0.0265301	0.173767	0.341771	0.0476216	-0.00445791	1.29052	0.408147	0.555291	-0.0100074	0.433287	0.765654	0.0133918	TC305412	AT5G64660.1	NM_125862	U-box domain-containing protein	GO:0000151(ubiquitin ligase complex)|GO:0004842(ubiquitin-protein ligase activity)|GO:0005488(binding)|GO:0016567(protein ubiquitination)
A_84_P16571	-0.0930003	0.0726852	-0.310431	-0.113902	0.0159133	1.1898	0.242293	0.898953	-0.00133212	1.27227	1.35249	1.28978	TC289023	AT3G56400.1	NM_115498	WRKY70 (WRKY DNA-binding protein 70); transcription factor	GO:0003700(transcription factor activity)|GO:0005634(nucleus)|GO:0006355(regulation of transcription, DNA-dependent)|GO:0009753(response to jasmonic acid stimulus)|GO:0009759(indole glucosinolate biosynthetic process)|GO:0009862(systemic acquired resistance, salicylic acid mediated signaling pathway)|GO:0009864(induced systemic resistance, jasmonic acid mediated signaling pathway)|GO:0010120(cama…
A_84_P21874	-0.0734309	-0.0931365	0.0198168	-0.0939829	-0.0626522	1.55456	0.860314	0.782977	0.0202142	1.12448	1.53721	0.69147	TC291890	AT1G27730.1	NM_102538	STZ (SALT TOLERANCE ZINC FINGER); nucleic acid binding / transcription factor/ zinc ion binding	GO:0003676(nucleic acid binding)|GO:0003700(transcription factor activity)|GO:0005634(nucleus)|GO:0006979(response to oxidative stress)|GO:0008270(zinc ion binding)|GO:0009409(response to cold)|GO:0009414(response to water deprivation)|GO:0009611(response to wounding)|GO:0009644(response to high light intensity)|GO:0009651(response to salt stress)|GO:0009737(response to abscisic acid stimulus)|GO…
A_84_P109472	0.0678617	1.1219	-1.43942	0.048151	-0.012785	0.527187	0.92526	1.91265	0.0276808	-1.60114	-0.122708	-1.54889	TC311639	AT2G47770.1	NM_130344	benzodiazepine receptor-related	GO:0003674(molecular_function)|GO:0008150(biological_process)|GO:0016021(integral to membrane)
A_84_P22607	-0.0532433	-0.0594062	0.312112	-0.0728384	-0.00639715	1.36523	1.19206	0.685366	-0.0315119	0.839635	0.969858	0.453616	TC308034	AT5G61600.1	NM_125553	ethylene-responsive element-binding family protein	GO:0003677(DNA binding)|GO:0003700(transcription factor activity)|GO:0005634(nucleus)|GO:0006355(regulation of transcription, DNA-dependent)
A_84_P598642	-0.0174564	0.102963	0.241006	0.00211044	0.0242859	1.48285	0.730221	0.62629	-0.00874288	0.7709	1.01149	0.300705	TC293671	AT1G07135.1	NM_100587	glycine-rich protein	GO:0003674(molecular_function)|GO:0008150(biological_process)|GO:0031225(anchored to membrane)
A_84_P171073	-0.0583945	-0.140335	0.309627	-0.0779259	-0.0163143	1.42794	1.05312	0.737253	-0.00498527	0.926166	1.21622	0.628637	TC294011	AT1G35210.1	NM_103219	hypothetical protein	GO:0003674(molecular_function)|GO:0008150(biological_process)|GO:0009507(chloroplast)
A_84_P265280	-0.120495	-0.253921	0.0056686	-0.138859	-0.0183357	-0.361771	0.0786155	-0.247991	0.0524342	-1.03018	-1.17325	-0.953893	TC283495	AT1G72790.1	NM_105937	hydroxyproline-rich glycoprotein family protein	GO:0003674(molecular_function)|GO:0005575(cellular_component)|GO:0008150(biological_process)
A_84_P816205	-0.0570598	-0.093511	0.0874076	-0.0743527	0.0320702	-0.0510004	0.258498	-0.128165	0.0191249	-1.1107	-1.23384	-1.0921	TC292777	AT2G40940.1	NM_129658	ERS1 (ETHYLENE RESPONSE SENSOR 1); receptor	GO:0004673(protein histidine kinase activity)|GO:0004872(receptor activity)|GO:0010105(negative regulation of ethylene mediated signaling pathway)|GO:0016020(membrane)|GO:0051740(ethylene binding)
A_84_P855484	-0.20292	-0.0602886	-0.208036	-0.219833	-0.0143378	-0.222123	0.676671	-0.435826	-0.00270978	-0.163756	-0.576348	-0.023813	TC309871	TC309871
A_84_P599034	-0.027554	-0.177355	-0.0957755	-0.0114419	0.0136732	1.0149	0.0106293	0.58702	-0.0384876	-0.0284265	0.372897	-0.0485802		AT3G16860.1	NM_112562	COBL8 (COBRA-LIKE PROTEIN 8 PRECURSOR)	GO:0008150(biological_process)|GO:0031225(anchored to membrane)
A_84_P825539	0.145	-0.674462	-0.867912	0.13026	0.0866748	1.34044	0.212009	1.50048	-0.0589276	2.45171	1.4065	1.76195	TC311978	AT1G32350.1	NM_102968	AOX1D (ALTERNATIVE OXIDASE 1D); alternative oxidase	GO:0005739(mitochondrion)|GO:0005740(mitochondrial envelope)|GO:0006118(electron transport)|GO:0009916(alternative oxidase activity)
A_84_P785475	-0.0610774	-0.302674	-0.795663	-0.0756555	-0.00867227	0.385768	-0.672612	0.475695	-0.0167558	-0.171615	0.491649	0.419532	TC280847	AT1G17420.1	NM_101603	LOX3 (Lipoxygenase 3); iron ion binding / lipoxygenase/ metal ion binding / oxidoreductase, acting on single donors with incorporation of molecular oxygen, incorporation of two atoms of oxygen	GO:0005506(iron ion binding)|GO:0006952(defense response)|GO:0009507(chloroplast)|GO:0009611(response to wounding)|GO:0009695(jasmonic acid biosynthetic process)|GO:0016165(lipoxygenase activity)|GO:0016702(oxidoreductase activity, acting on single donors with incorporation of molecular oxygen, incorporation of two atoms of oxygen)|GO:0040007(growth)|GO:0046872(metal ion binding)
A_84_P217688	-0.0253287	0.00329296	0.0434383	-0.0109914	0.014765	1.51825	0.862146	0.653466	0.00701186	1.11056	1.20508	0.770865	TC309749	AT1G76600.1	NM_106310	hypothetical protein	GO:0003674(molecular_function)|GO:0005634(nucleus)|GO:0005730(nucleolus)|GO:0006499(N-terminal protein myristoylation)
A_84_P13976	-0.0990208	0.0213248	-0.0528645	-0.089974	-0.0285813	-0.27762	0.616772	-0.431136	-0.00154033	-0.148482	-0.660413	-0.0487619	TC296982	AT5G19120.1	NM_121917	aspartic-type endopeptidase/ pepsin A	GO:0004190(aspartic-type endopeptidase activity)|GO:0004194(pepsin A activity)|GO:0006508(proteolysis)|GO:0012505(endomembrane system)
A_84_P94789	0.183666	0.15793	0.354915	0.174985	-0.0174588	1.39841	0.0844948	0.896316	0.0151877	0.753694	1.11915	0.707017	TC306320	AT3G06890.1	NM_111569	hypothetical protein	GO:0003674(molecular_function)|GO:0005575(cellular_component)|GO:0008150(biological_process)
A_84_P21943	-0.0903413	-0.22487	-0.0146064	-0.0978977	-0.0546189	-0.113933	0.421069	-0.0569632	-0.0135914	-0.712377	-1.09202	-0.503203	TC287816	AT1G32170.1	NM_102950	XTR4 (XYLOGLUCAN ENDOTRANSGLYCOSYLASE 4); hydrolase, acting on glycosyl bonds	GO:0005618(cell wall)|GO:0005975(carbohydrate metabolic process)|GO:0006073(glucan metabolic process)|GO:0012505(endomembrane system)|GO:0016798(hydrolase activity, acting on glycosyl bonds)|GO:0048046(apoplast)
A_84_P19511	-0.0578441	-0.0879111	0.190239	-0.0652294	0.000386083	1.3497	0.0901816	0.576636	0.0141077	0.662029	1.22083	0.562842	TC291921	AT4G24380.1	NM_001036630	hypothetical protein	GO:0009257(10-formyltetrahydrofolate biosynthetic process)|GO:0009396(folic acid and derivative biosynthetic process)
A_84_P758693	-0.0697072	-0.164969	0.0501889	-0.062733	0.0114596	0.849468	0.06312	0.525938	0.00231625	0.0395202	0.637004	0.123051		AT2G35658.2	NM_001124974	hypothetical protein
A_84_P21088	-0.135755	-0.34522	0.381959	-0.142433	-0.0114565	0.549984	-0.0478231	0.311727	0.0249811	-0.913969	-1.12823	-0.894529	TC300059	AT2G40670.1	NM_129629	ARR16 (response regulator 16); transcription regulator/ two-component response regulator	GO:0000156(two-component response regulator activity)|GO:0005737(cytoplasm)|GO:0009735(response to cytokinin stimulus)|GO:0009736(cytokinin mediated signaling)|GO:0030528(transcription regulator activity)
A_84_P811412	-0.0864744	-0.324457	-0.205964	-0.0806616	0.0905885	-0.174681	0.574237	-0.390161	0.0399383	-0.60263	-1.40517	-0.527819	TC300650	AT5G20250.2	NM_122032	DIN10 (DARK INDUCIBLE 10); hydrolase, hydrolyzing O-glycosyl compounds	GO:0004553(hydrolase activity, hydrolyzing O-glycosyl compounds)|GO:0007568(aging)|GO:0009416(response to light stimulus)|GO:0009744(response to sucrose stimulus)
A_84_P820417	0.0469896	0.16046	0.320938	0.0415584	0.010165	1.67397	0.904958	0.723108	0.0507616	1.33452	1.74486	1.03811	TC289776	AT4G17490.1	NM_117854	ATERF6 (ETHYLENE RESPONSIVE ELEMENT BINDING FACTOR 6); DNA binding / transcription factor	GO:0003677(DNA binding)|GO:0003700(transcription factor activity)|GO:0005634(nucleus)|GO:0006355(regulation of transcription, DNA-dependent)|GO:0009873(ethylene mediated signaling pathway)
A_84_P94209	0.0158895	0.0434422	-0.182856	0.0108836	0.015543	0.633732	-0.495673	-0.019282	-0.0522191	0.559663	0.76157	0.226291	TC281808	AT4G02410.1	NM_116474	lectin protein kinase family protein	GO:0006468(protein amino acid phosphorylation)|GO:0012505(endomembrane system)|GO:0016301(kinase activity)
A_84_P11470	0.0352012	0.0599577	0.242192	0.0317104	0.0450413	1.60136	0.864242	0.900582	-0.0316699	1.10459	1.17705	0.743037	TC299781	AT1G66400.1	NM_105311	calmodulin-related protein, putative	GO:0005509(calcium ion binding)|GO:0005575(cellular_component)|GO:0008150(biological_process)
A_84_P11609	-0.0213565	0.17743	-0.397438	-0.0240577	-0.0251496	0.384402	-0.846346	-0.539449	-0.00975398	1.16699	0.971178	0.411033	NP456080	NP456080
A_84_P16802	0.0327144	-0.376758	-0.0336182	0.0352242	-0.0225953	-0.144839	0.76094	-0.335827	0.00424649	-0.198398	-0.746484	0.158199	TC289325	AT5G14470.1	NM_121451	GHMP kinase-related	GO:0004335(galactokinase activity)|GO:0005524(ATP binding)|GO:0005737(cytoplasm)|GO:0008152(metabolic process)|GO:0016310(phosphorylation)
A_84_P603792	0.097866	0.0809678	-0.287367	0.0961427	0.0324685	0.00633971	-0.617988	-0.225289	-0.0261677	0.564753	0.583611	0.529941	TC283516	AT5G22860.2	NM_122191	serine carboxypeptidase S28 family protein	GO:0006508(proteolysis)|GO:0008233(peptidase activity)|GO:0012505(endomembrane system)
A_84_P535346	0.234456	0.0992504	-0.0287051	0.235476	0.0356919	1.38584	0.511773	0.864469	0.122911	1.21657	1.74629	1.13163	TC286669	AT5G22540.1	NM_122159	hypothetical protein	GO:0003674(molecular_function)|GO:0005575(cellular_component)|GO:0008150(biological_process)
A_84_P814616	-0.0727754	0.126518	-0.799549	-0.0717942	0.00544001	-0.248792	-0.995455	-0.0120666	-0.00319698	-1.20564	-1.02481	0.114721	TC308670	AT4G37410.1	NM_119904	CYP81F4 (cytochrome P450, family 81, subfamily F, polypeptide 4); oxygen binding	GO:0005783(endoplasmic reticulum)|GO:0006118(electron transport)|GO:0019825(oxygen binding)
A_84_P786287	0.118758	0.23579	-0.242295	0.11937	-0.000830114	1.10392	0.254675	0.316868	-0.0270935	0.754273	1.33154	0.246304	TC298544	AT5G05410.2	NM_001036760	DREB2A (DRE-BINDING PROTEIN 2A); DNA binding / transcription activator/ transcription factor	GO:0003677(DNA binding)|GO:0003700(transcription factor activity)|GO:0005634(nucleus)|GO:0006355(regulation of transcription, DNA-dependent)|GO:0009408(response to heat)|GO:0009414(response to water deprivation)|GO:0010224(response to UV-B)|GO:0010286(heat acclimation)|GO:0016563(transcription activator activity)|GO:0042542(response to hydrogen peroxide)
A_84_P18787	-0.0727824	-0.207796	-0.0877346	-0.0733628	-0.05966	-0.245447	0.482494	-0.263005	0.0420282	-0.41718	-0.73018	-0.443732	TC305590	AT5G52250.1	NM_124604	transducin family protein / WD-40 repeat family protein	GO:0000166(nucleotide binding)|GO:0005834(heterotrimeric G-protein complex)|GO:0010114(response to red light)|GO:0010218(response to far red light)|GO:0010224(response to UV-B)
A_84_P17510	-0.20044	-0.177973	-0.0273863	-0.200935	-0.0655292	-0.0654822	0.666282	0.00950866	-0.000530198	-0.944115	-1.39425	-0.848834	TC283879	AT1G23870.1	NM_102235	ATTPS9 (Arabidopsis thaliana trehalose-phosphatase/synthase 9); transferase, transferring glycosyl groups / trehalose-phosphatase	GO:0004805(trehalose-phosphatase activity)|GO:0005992(trehalose biosynthetic process)|GO:0016757(transferase activity, transferring glycosyl groups)

## Sheet: WoA>Mc-3h
WoA>Mc-3h
Type	without aphid	M. cerasi	M. persicae	R. padi	without aphid	M. cerasi	M. persicae	R. padi	without aphid	M. cerasi	M. persicae	R. padi
Time	3h				6h				24h
Systematic	log2												TIGRID	At accession	GenbankAccession	Gene function	GO
A_84_P305070	0.11401	-2.75641	-2.99878	-2.22718	0.0351296	-1.23396	-2.71394	-2.08326	0.0190402	2.38675	2.63684	1.32617	TC284320	AT2G15020.1	NM_127064	hypothetical protein	GO:0003674(molecular_function)|GO:0005575(cellular_component)|GO:0008150(biological_process)
A_84_P19241	-0.237307	-2.7187	-2.7895	-2.17185	0.0290967	-1.58037	-1.96908	-1.78337	-0.0142357	0.0533761	0.12892	-0.364137	TC284054	AT2G46830.1	NM_180129	CCA1 (CIRCADIAN CLOCK ASSOCIATED 1); transcription factor	GO:0003677(DNA binding)|GO:0003700(transcription factor activity)|GO:0007623(circadian rhythm)|GO:0009651(response to salt stress)|GO:0009723(response to ethylene stimulus)|GO:0009733(response to auxin stimulus)|GO:0009737(response to abscisic acid stimulus)|GO:0009739(response to gibberellin stimulus)|GO:0009751(response to salicylic acid stimulus)|GO:0009753(response to jasmonic acid stimulus)|…
A_84_P739644	0.251293	-2.09481	-2.59845	-1.89072	-0.0422895	-0.978726	-1.87021	-1.3291	0.00741472	1.33894	1.55866	1.17321		AT1G70260.1	NM_105694	nodulin MtN21 family protein	GO:0003674(molecular_function)|GO:0016020(membrane)
A_84_P845388	0.0918041	-2.18551	-2.22352	-2.16698	0.041933	0.618095	0.566162	0.296141	0.0857754	-0.113305	0.233436	-0.296946	TC290515	TC290515			GO:0008152(metabolic process)|GO:0016491(oxidoreductase activity)
A_84_P11914	0.187929	-1.88766	-1.90934	-1.80339	-0.0201813	-1.289	0.492591	-1.48912	0.0317133	-0.785089	-0.892602	-0.918503	TC297656	AT4G12400.1	NM_117310	stress-inducible protein, putative	GO:0005488(binding)|GO:0005575(cellular_component)|GO:0006950(response to stress)|GO:0009408(response to heat)|GO:0009644(response to high light intensity)|GO:0042542(response to hydrogen peroxide)
A_84_P836671	0.14495	-1.85467	-2.91599	-2.12048	0.0118517	-0.67648	-1.66892	-1.85388	0.00197645	1.69531	1.37426	1.50242	TC300702	TA52555_3702
A_84_P595614	0.318823	-1.53262	-1.63489	-1.70391	-0.069733	0.785095	0.0280314	0.56861	0.00844701	1.49494	1.89553	1.36589	TC282027	AT4G14390.1	NM_117518	ankyrin repeat family protein	GO:0003674(molecular_function)|GO:0005575(cellular_component)|GO:0008150(biological_process)
A_84_P20292	-0.320637	-2.05529	-1.88551	-1.90294	-0.0297273	-1.2829	-1.42994	-1.50009	0.00956328	0.292043	0.180949	-0.203656	TC293154	AT3G02380.1	NM_111105	COL2 (CONSTANS-LIKE 2); transcription factor/ zinc ion binding	GO:0003700(transcription factor activity)|GO:0005622(intracellular)|GO:0008270(zinc ion binding)|GO:0009909(regulation of flower development)
A_84_P19231	0.26897	-1.45722	-1.99364	-1.32525	0.014891	-1.02319	0.595363	-1.63351	-0.0413012	-0.783157	-0.611762	-1.52604	TC289736	AT2G26150.1	NM_001124916	ATHSFA2 (Arabidopsis thaliana heat shock transcription factor A2)	GO:0003677(DNA binding)|GO:0003700(transcription factor activity)|GO:0005634(nucleus)|GO:0009408(response to heat)|GO:0009644(response to high light intensity)|GO:0012505(endomembrane system)|GO:0042542(response to hydrogen peroxide)
A_84_P18640	0.679823	-1.00839	-1.88603	-1.6659	-0.164253	2.46738	-0.303202	2.43903	-0.0381801	1.29606	1.61885	3.22519	TC282751	AT4G16590.1	NM_117760	ATCSLA01 (Cellulose synthase-like A1); glucosyltransferase/ transferase, transferring glycosyl groups	GO:0005575(cellular_component)|GO:0008150(biological_process)|GO:0016757(transferase activity, transferring glycosyl groups)|GO:0016759(cellulose synthase activity)|GO:0046527(glucosyltransferase activity)
A_84_P13983	-0.0492096	-1.7026	-2.05362	-1.68165	-0.0452472	-0.909871	-1.41345	-1.49735	0.0593804	0.728037	0.607277	0.0289323	TC291213	AT5G24120.1	NM_122317	SIGE (RNA polymerase sigma subunit E); DNA binding / DNA-directed RNA polymerase/ sigma factor/ transcription factor	GO:0003677(DNA binding)|GO:0003700(transcription factor activity)|GO:0003899(DNA-directed RNA polymerase activity)|GO:0006352(transcription initiation)|GO:0006355(regulation of transcription, DNA-dependent)|GO:0010114(response to red light)|GO:0010218(response to far red light)|GO:0016987(sigma factor activity)
A_84_P751150	0.518198	-1.11539	-1.68838	-1.26598	0.0316473	0.660124	0.276084	0.790711	0.0231487	1.19608	0.993629	1.30026	NP041492	AT1G02230.1	NM_100104	ANAC004 (Arabidopsis NAC domain containing protein 4); transcription factor	GO:0003700(transcription factor activity)|GO:0005575(cellular_component)|GO:0007275(multicellular organismal development)
A_84_P16903	0.1394	-1.47832	-2.2541	-1.66535	-0.0424249	0.0101989	-1.14518	-0.154048	-0.0205537	1.404	1.53838	1.16729	TC295859	AT5G54610.1	NM_124842	ANK (ANKYRIN); protein binding	GO:0005515(protein binding)|GO:0005575(cellular_component)|GO:0009751(response to salicylic acid stimulus)
A_84_P720334	0.723779	-0.888609	-1.669	-1.8158	0.041933	2.9504	0.778746	0.547052	0.0344561	2.54241	3.11266	0.624213		TA29990_3702
A_84_P18814	0.171486	-1.36446	-1.07162	-1.26171	-0.00697476	-0.885731	-0.85051	-0.492236	0.0323099	0.12496	0.641512	-0.0190426	TC281018	AT5G59670.1	NM_125359	leucine-rich repeat protein kinase, putative	GO:0006468(protein amino acid phosphorylation)|GO:0012505(endomembrane system)|GO:0016301(kinase activity)
A_84_P22334	0.114804	-1.41415	-2.11871	-1.92505	0.000336565	-0.728642	-0.116133	-1.45583	-0.00764012	0.411661	-0.0139118	-0.148959	TC284168	AT4G20820.1	NM_118200	FAD-binding domain-containing protein	GO:0006118(electron transport)|GO:0009055(electron carrier activity)
A_84_P513574	0.0140557	-1.48627	-2.17041	-1.7223	-0.00708549	-0.0434734	0.0914289	0.159305	0.0294272	0.819665	1.02401	0.826605	TC304936	AT2G14560.2	NM_201727	hypothetical protein	GO:0003674(molecular_function)|GO:0005575(cellular_component)|GO:0008150(biological_process)|GO:0009751(response to salicylic acid stimulus)|GO:0050832(defense response to fungus)
A_84_P258120	0.329525	-1.16534	-2.07753	-0.824362	-0.153152	2.75858	2.89738	2.73156	-0.0990434	-0.862536	-1.32771	-1.08132	TC303895	AT1G75830.1	NM_106233	LCR67/PDF1.1 (Low-molecular-weight cysteine-rich 67)	GO:0003674(molecular_function)|GO:0005618(cell wall)|GO:0006952(defense response)
A_84_P17828	0.186887	-1.29297	-1.41624	-1.23292	-0.0245516	-0.874558	0.388614	-1.36444	0.0308015	-0.302267	-0.203721	-0.578177	TC304278	AT5G48570.1	NM_124233	peptidyl-prolyl cis-trans isomerase, putative / FK506-binding protein, putative	GO:0003755(peptidyl-prolyl cis-trans isomerase activity)|GO:0005516(calmodulin binding)|GO:0005528(FK506 binding)|GO:0005575(cellular_component)|GO:0006457(protein folding)
A_84_P18401	0.0445309	-1.4277	-1.84511	-1.17249	-0.0333127	-0.695686	0.335116	-1.10851	-0.0260529	-0.288093	-0.227118	-0.750427	TC281774	AT3G12580.1	NM_112093	HSP70 (heat shock protein 70); ATP binding	GO:0005524(ATP binding)|GO:0005829(cytosol)|GO:0006457(protein folding)|GO:0009408(response to heat)|GO:0009615(response to virus)|GO:0009617(response to bacterium)|GO:0009644(response to high light intensity)|GO:0042542(response to hydrogen peroxide)
A_84_P756427	0.558758	-0.886325	-1.35573	-0.21449	0.0353775	1.03248	-0.860574	-0.0544207	-0.0252085	3.12112	3.59135	2.26877	TC289330	AT2G27420.1	NM_128302	cysteine proteinase, putative	GO:0006508(proteolysis)|GO:0008234(cysteine-type peptidase activity)|GO:0012505(endomembrane system)
A_84_P10696	0.153833	-1.23205	-1.15668	-1.33237	-0.0337303	-0.0260583	-0.292187	-0.243522	-0.0286033	0.164315	0.408535	0.133245	TC306445	AT2G24160.1		pseudo
A_84_P93089	-0.535617	-1.91989	-3.08694	-2.3149	-0.00533262	-1.14504	-2.10308	-1.56106	0.00959158	1.68369	1.41505	1.49537	TC292156	AT1G13650.1	NM_179324	hypothetical protein	GO:0003674(molecular_function)|GO:0005575(cellular_component)|GO:0008150(biological_process)
A_84_P186914	0.547502	-0.768875	-2.72615	0.121402	0.0154602	0.470391	-0.722816	0.265655	-0.0089893	1.74887	2.0105	1.88959	TC286860	AT3G11480.1	NM_111981	BSMT1; S-adenosylmethionine-dependent methyltransferase	GO:0005575(cellular_component)|GO:0006952(defense response)|GO:0008757(S-adenosylmethionine-dependent methyltransferase activity)|GO:0009611(response to wounding)|GO:0051707(response to other organism)
A_84_P94599	0.0461794	-1.25845	-1.10129	-1.07845	-0.0284574	-0.534169	-0.965543	-0.814677	0.0373041	0.738384	1.06809	0.53146	TC295116	AT3G56290.1	NM_115487	hypothetical protein	GO:0003674(molecular_function)|GO:0008150(biological_process)
A_84_P12395	-0.00747176	-1.30078	-1.60588	-1.21226	-0.0112306	-0.969539	-1.12192	-1.03149	-0.0586953	0.712087	1.06426	0.538642	TC307856	AT1G32900.1	NM_103023	starch synthase, putative	GO:0009058(biosynthetic process)|GO:0009250(glucan biosynthetic process)|GO:0009507(chloroplast)|GO:0016757(transferase activity, transferring glycosyl groups)
A_84_P23899	0.10609	-1.18097	-1.29066	-0.866584	0.00698021	0.172133	0.276342	0.330233	-0.0123544	0.0711114	0.156831	0.166435	TC297610	AT2G29500.1	NM_128504	17.6 kDa class I small heat shock protein (HSP17.6B-CI)	GO:0003674(molecular_function)|GO:0006979(response to oxidative stress)|GO:0009408(response to heat)|GO:0009644(response to high light intensity)|GO:0042542(response to hydrogen peroxide)
A_84_P17111	0.336474	-0.942982	-1.32359	-0.782204	-0.062162	-0.316536	-0.963339	-0.61672	0.0204559	1.26077	1.59737	0.802486	TC296923	AT1G02820.1	NM_100163	late embryogenesis abundant 3 family protein / LEA3 family protein	GO:0003674(molecular_function)|GO:0009790(embryonic development)
A_84_P235073	-0.306987	-1.57466	-2.23314	-1.81548	-0.0623371	-1.1336	-1.99309	-2.11034	-0.018332	0.588308	0.38209	0.0591216	TC288208	AT1G73870.1	NM_106047	zinc finger (B-box type) family protein	GO:0003700(transcription factor activity)|GO:0005622(intracellular)|GO:0008270(zinc ion binding)|GO:0045449(regulation of transcription)
A_84_P21945	0.136249	-1.11229	-1.21268	-0.353167	-0.0355352	1.00335	0.316069	1.14358	0.018941	2.32358	1.46816	1.56466	TC286535	AT1G32350.1	NM_102968	AOX1D (ALTERNATIVE OXIDASE 1D); alternative oxidase	GO:0005739(mitochondrion)|GO:0005740(mitochondrial envelope)|GO:0006118(electron transport)|GO:0009916(alternative oxidase activity)
A_84_P537220	0.510139	-0.713943	-0.83338	-0.196054	0.0920069	2.03484	1.31734	1.19151	-0.0306109	1.59785	1.57098	1.18676	NP231037	AT5G57510.1	NM_125132	hypothetical protein	GO:0003674(molecular_function)|GO:0008150(biological_process)
A_84_P23174	-0.00442946	-1.20692	-0.635397	-1.10511	-0.0236873	-0.288388	-0.788664	-0.549052	-0.0670888	0.403195	0.657027	0.33478	TC291909	AT3G52720.1	NM_115132	carbonic anhydrase family protein	GO:0004089(carbonate dehydratase activity)|GO:0006730(one-carbon compound metabolic process)|GO:0008270(zinc ion binding)|GO:0012505(endomembrane system)
A_84_P186924	0.0995843	-1.09341	-1.48102	-1.2276	0.00408514	0.120221	-0.42021	0.00215333	-0.00241363	0.579908	0.920704	0.339717	TC281125	AT1G65790.1	NM_105252	ARK1 (A. THALIANA RECEPTOR KINASE I); kinase	GO:0004674(protein serine/threonine kinase activity)|GO:0006468(protein amino acid phosphorylation)|GO:0009875(pollen-pistil interaction)|GO:0016020(membrane)|GO:0016301(kinase activity)|GO:0019199(transmembrane receptor protein kinase activity)
A_84_P169033	-0.00331421	-1.19004	-1.22763	-0.421788	0.0112708	0.955547	0.959153	0.664603	-0.0338503	1.97417	1.15578	3.1263		AT1G65970.1	NM_105269	TPX2 (THIOREDOXIN-DEPENDENT PEROXIDASE 2); antioxidant	GO:0005575(cellular_component)|GO:0008150(biological_process)|GO:0016209(antioxidant activity)
A_84_P867949	-0.09012	-1.273	-0.973244	-0.379824	-0.0995822	0.947622	1.05754	0.631677	0.0599418	1.22507	1.35328	0.701556	TC304558	AT4G12735.1	NM_202810	hypothetical protein	GO:0003674(molecular_function)|GO:0008150(biological_process)
A_84_P14948	0.122247	-1.05604	-0.00769636	-1.17315	0.0077688	0.445144	0.828604	0.535501	-0.0265742	-2.17754	-1.31789	-2.04402	TC291934	AT5G37260.1	NM_123085	CIR1/RVE2 (CIRCADIAN 1); DNA binding / transcription factor	GO:0003677(DNA binding)|GO:0003700(transcription factor activity)|GO:0007623(circadian rhythm)|GO:0009651(response to salt stress)|GO:0009723(response to ethylene stimulus)|GO:0009733(response to auxin stimulus)|GO:0009737(response to abscisic acid stimulus)|GO:0009739(response to gibberellin stimulus)|GO:0009751(response to salicylic acid stimulus)|GO:0009753(response to jasmonic acid stimulus)|…
A_84_P21761	-0.317529	-1.49395	-1.54592	-1.52596	-0.000364993	-0.683791	-0.770517	-0.98299	-0.00115253	0.753468	0.822837	0.204694	TC287432	AT1G64500.1	NM_105125	glutaredoxin family protein	GO:0005575(cellular_component)|GO:0006118(electron transport)|GO:0006499(N-terminal protein myristoylation)|GO:0030508(thiol-disulfide exchange intermediate activity)
A_84_P226889	0.0444275	-1.11937	-1.17884	-0.986057	-0.0214959	0.485505	-0.0914249	-0.129405	0.0409897	0.726771	1.01398	0.71128	TC296039	AT4G20000.1	NM_118119	VQ motif-containing protein	GO:0003674(molecular_function)|GO:0005575(cellular_component)|GO:0008150(biological_process)
A_84_P831167	0.113316	-1.02275	-1.06696	-0.99398	0.0279632	-0.207567	-0.749097	-0.378748	0.063488	0.679026	0.797834	0.478164	TC294131	AT1G69730.1	NM_105641	protein kinase family protein	GO:0006468(protein amino acid phosphorylation)|GO:0012505(endomembrane system)|GO:0016301(kinase activity)
A_84_P12560	-0.0981687	-1.23367	-1.65622	-1.38297	-0.0514237	-1.06929	-1.59334	-1.53197	0.022401	0.466588	0.32164	0.0138812	TC293522	AT2G31380.1	NM_128695	STH (salt tolerance homologue); transcription factor/ zinc ion binding	GO:0003700(transcription factor activity)|GO:0005622(intracellular)|GO:0008270(zinc ion binding)|GO:0012505(endomembrane system)|GO:0019904(protein domain specific binding)|GO:0045449(regulation of transcription)
A_84_P13826	-0.00543006	-1.13756	-1.11826	-0.980847	0.00094624	-0.0517792	-1.25436	-0.254417	0.0395201	0.227463	0.828966	0.624894	TC284469	AT4G21760.1	NM_118296	BGLU47 (Beta-glucosidase 47); hydrolase, hydrolyzing O-glycosyl compounds	GO:0004553(hydrolase activity, hydrolyzing O-glycosyl compounds)|GO:0005975(carbohydrate metabolic process)|GO:0012505(endomembrane system)
A_84_P23539	-0.211606	-1.33714	-1.37164	-1.17761	0.00186772	-0.206246	-0.519045	-0.437792	-0.0244044	0.680184	0.967283	0.0486906	NP225790	AT5G58770.1	NM_125264	dehydrodolichyl diphosphate synthase, putative / DEDOL-PP synthase, putative	GO:0019408(dolichol biosynthetic process)|GO:0045547(dehydrodolichyl diphosphate synthase activity)
A_84_P855873	-0.079761	-1.20228	-1.32084	-1.37475	0.129983	-0.0996003	-0.170519	0.0665559	0.00861748	0.442233	0.790692	0.325812	TC310124	T42092
A_84_P19508	-0.0239669	-1.14441	-1.75411	-1.19285	-0.0743364	-0.564433	-1.2713	-0.441353	-0.0369199	-0.258872	0.00881276	-0.481631	TC299672	AT4G23680.1	NM_118499	major latex protein-related / MLP-related	GO:0003674(molecular_function)|GO:0005575(cellular_component)|GO:0006952(defense response)|GO:0009607(response to biotic stimulus)
A_84_P594936	0.0188616	-1.07945	-0.306632	-1.01881	0.0863016	1.92671	1.1393	1.02317	0.0430888	1.12514	1.39676	0.3253	TC314168	AT5G45340.2	NM_123902	CYP707A3 (cytochrome P450, family 707, subfamily A, polypeptide 3); oxygen binding	GO:0009414(response to water deprivation)|GO:0009639(response to red or far red light)|GO:0010295((+)-abscisic acid 8'-hydroxylase activity)|GO:0012505(endomembrane system)|GO:0019825(oxygen binding)|GO:0046345(abscisic acid catabolic process)
A_84_P18192	0.360834	-0.714216	-1.68713	-1.22245	-0.0217132	-0.213238	-1.80468	-0.756499	0.00147797	0.926656	0.635786	0.8246	TC311043	AT2G20750.1	NM_127640	ATEXPB1 (ARABIDOPSIS THALIANA EXPANSIN B1)	GO:0003674(molecular_function)|GO:0005576(extracellular region)|GO:0009664(plant-type cell wall organization and biogenesis)|GO:0009826(unidimensional cell growth)|GO:0009828(plant-type cell wall loosening)|GO:0012505(endomembrane system)
A_84_P850790	0.0958897	-0.966992	-1.01184	-1.05499	0.0945381	-0.203805	-0.183673	0.0259618	0.00963514	0.411558	0.779815	0.306942	TC305469	BP783345
A_84_P221276	-0.0198227	-1.07667	-1.18325	-1.22276	0.073555	-0.436088	-0.721145	-0.434718	-0.000683347	0.499591	0.366503	0.6885	TC292921	AT5G22390.1	NM_122144	hypothetical protein
A_84_P12551	0.212147	-0.840856	-1.64987	-0.119256	0.0654109	1.27387	1.38295	1.7918	0.0369793	1.22213	0.920275	2.11075	TC294659	AT2G29470.1	NM_128501	ATGSTU3 (GLUTATHIONE S-TRANSFERASE 21); glutathione transferase	GO:0004364(glutathione transferase activity)|GO:0005737(cytoplasm)|GO:0009407(toxin catabolic process)
A_84_P795530	0.0196414	-1.02254	-1.22571	-0.962054	0.0113539	-0.625796	-0.635104	-0.717509	-0.0378582	0.445912	0.0388675	0.668721	TC292921	AT5G22390.1	NM_122144	hypothetical protein
A_84_P17207	0.410168	-0.618081	-1.21693	-0.967265	0.000895666	0.290447	-0.621342	-0.0936418	0.00958159	1.58891	2.10258	1.36588	TC287417	AT1G57590.1	NM_104556	carboxylesterase	GO:0004091(carboxylesterase activity)|GO:0008150(biological_process)
A_84_P12374	0.107929	-0.910263	-0.941801	-1.21101	-0.0129682	0.3228	-0.121408	-0.0157887	0.0185218	0.368101	0.211372	0.320546	TC305326	AT1G15290.1	NM_101398	binding	GO:0005488(binding)|GO:0005575(cellular_component)|GO:0008150(biological_process)
A_84_P12851	0.423899	-0.581646	-1.37391	-0.801504	-0.0351107	1.02286	-0.262897	0.655763	-0.0149577	1.18568	1.43506	0.879162	TC287934	AT4G10500.1	NM_117118	oxidoreductase, 2OG-Fe(II) oxygenase family protein	GO:0016706(oxidoreductase activity, acting on paired donors, with incorporation or reduction of molecular oxygen, 2-oxoglutarate as one donor, and incorporation of one atom each of oxygen into both donors)|GO:0019748(secondary metabolic process)
A_84_P20998	0.252685	-0.7476	-0.0613234	-0.374745	-0.00714711	0.118318	0.849327	0.0909955	-0.000680046	-1.25963	-1.5533	-1.52893	TC288775	AT1G35140.1	NM_103210	PHI-1 (PHOSPHATE-INDUCED 1)	GO:0003674(molecular_function)|GO:0008150(biological_process)|GO:0009505(plant-type cell wall)
A_84_P22736	0.194766	-0.805481	-0.719284	-0.499052	-0.00891512	0.0147456	-0.120614	0.645211	0.0855186	1.03395	1.34884	-0.0327969	TC289189	AT1G09500.1	NM_179294	cinnamyl-alcohol dehydrogenase family / CAD family	GO:0004022(alcohol dehydrogenase activity)|GO:0009809(lignin biosynthetic process)|GO:0012505(endomembrane system)|GO:0045551(cinnamyl-alcohol dehydrogenase activity)
A_84_P57860	-0.226629	-1.20714	-1.13855	-1.19966	0.00124671	-0.157562	-0.761182	-0.377749	0.00275523	0.737016	1.14046	0.383737	TC309241	AT1G65490.1	NM_105223	hypothetical protein	GO:0003674(molecular_function)|GO:0008150(biological_process)|GO:0012505(endomembrane system)
A_84_P21186	0.033853	-0.910912	-1.86163	-1.26566	0.0168237	-0.330275	-0.973061	-0.469023	-0.00969861	1.19877	1.05831	0.898566	TC282193	AT3G21670.1	NM_113062	nitrate transporter (NTP3)	GO:0005215(transporter activity)|GO:0006857(oligopeptide transport)|GO:0016020(membrane)
A_84_P844482	0.0377761	-0.899342	-0.868078	-0.886976	-0.00772817	-0.349613	-0.460892	-0.013609	-0.0730651	0.378051	0.671427	0.262107	TC282141	AT4G14400.1	NM_117519	ACD6 (ACCELERATED CELL DEATH 6); protein binding	GO:0005515(protein binding)|GO:0008219(cell death)|GO:0009751(response to salicylic acid stimulus)|GO:0009816(defense response to bacterium, incompatible interaction)|GO:0016020(membrane)
A_84_P108312	0.096599	-0.836395	-1.0225	-0.725277	0.0449561	-0.0273692	-0.49919	0.0480581	-0.0104253	0.3783	0.485853	0.345972	TC283177	AT2G46440.1	NM_130208	ATCNGC11 (cyclic nucleotide gated channel 11); calmodulin binding / cyclic nucleotide binding / ion channel	GO:0005216(ion channel activity)|GO:0005261(cation channel activity)|GO:0005516(calmodulin binding)|GO:0009620(response to fungus)|GO:0016020(membrane)|GO:0030551(cyclic nucleotide binding)
A_84_P20976	0.290937	-0.641382	-0.326414	-0.95184	0.383886	3.70861	1.31506	2.29698	-0.00522674	1.58074	3.02242	1.2407	TC298605	AT1G19210.1	NM_101779	AP2 domain-containing transcription factor, putative	GO:0003677(DNA binding)|GO:0003700(transcription factor activity)|GO:0005634(nucleus)|GO:0006355(regulation of transcription, DNA-dependent)
A_84_P192434	-0.0140083	-0.94584	-0.501859	-0.462194	-0.00731505	-0.92928	0.495998	-0.839889	0.060484	-1.09023	-1.38941	-1.06612	TC288795	AT4G36850.1	NM_119849	PQ-loop repeat family protein / transmembrane family protein	GO:0008150(biological_process)|GO:0016020(membrane)
A_84_P559896	0.110921	-0.818671	-1.28407	-0.928317	-0.0206494	-0.279927	-1.85602	-1.14309	-0.034546	0.813018	1.15871	0.35762	TC302010	AT3G44450.1	NM_114313	hypothetical protein	GO:0003674(molecular_function)|GO:0005575(cellular_component)|GO:0008150(biological_process)
A_84_P567338	-0.0044124	-0.933733	-1.08306	-0.894815	-0.00672456	-0.569329	-0.669272	-0.536008	0.0293444	0.723672	0.913054	0.318895	TC312144	AT5G55570.1	NM_124939	heat shock protein binding / unfolded protein binding	GO:0006457(protein folding)|GO:0009507(chloroplast)|GO:0031072(heat shock protein binding)|GO:0051082(unfolded protein binding)
A_84_P761052	-0.0310297	-0.953397	-0.539618	-0.81575	0.00181579	-0.19596	-0.790573	-0.449515	-0.00652277	0.591995	0.823302	0.565906	TC298947	AT3G52720.2	NM_180354	carbonic anhydrase family protein	GO:0004089(carbonate dehydratase activity)|GO:0006730(one-carbon compound metabolic process)|GO:0008270(zinc ion binding)|GO:0012505(endomembrane system)
A_84_P216038	-0.0318843	-0.948331	-0.999807	-0.991152	-0.00635956	-0.320742	-0.427025	0.00191	-0.0435687	0.363279	0.622113	0.280623	TC314310	AT4G14400.1	NM_117519	ACD6 (ACCELERATED CELL DEATH 6); protein binding	GO:0005515(protein binding)|GO:0008219(cell death)|GO:0009751(response to salicylic acid stimulus)|GO:0009816(defense response to bacterium, incompatible interaction)|GO:0016020(membrane)
A_84_P752604	0.144536	-0.769638	-0.716548	-0.489089	0.0259451	-0.0641982	-0.163964	0.691858	0.013447	1.01771	1.28554	-0.0865091	TC310085	AT1G09500.2	NM_001035935	cinnamyl-alcohol dehydrogenase family / CAD family	GO:0004022(alcohol dehydrogenase activity)|GO:0009809(lignin biosynthetic process)|GO:0012505(endomembrane system)|GO:0045551(cinnamyl-alcohol dehydrogenase activity)
A_84_P827393	0.228956	-0.683188	-0.865456	-0.839231	-0.0319196	1.16549	0.257509	0.542759	0.0451067	1.56445	1.92386	0.821323	NP162702	AT3G48650.1		pseudo
A_84_P764402	0.360826	-0.547274	-1.98391	-0.198881	0.0466164	0.353311	-1.55504	-0.292589	0.0575221	1.41462	1.53825	1.84106	TC301005	AT4G16740.1	NM_001036574	ATTPS03 (Arabidopsis thaliana terpene synthase 03)	GO:0009611(response to wounding)|GO:0016099(monoterpenoid biosynthetic process)|GO:0042408(myrcene/(E)-beta-ocimene synthase activity)
A_84_P581058	-0.297716	-1.19823	-1.39787	-1.62788	0.041933	2.07092	0.532719	0.634059	0.0881861	0.197013	2.63306	0.0133727	TC293535	AT2G27270.1	NM_128285	hypothetical protein	GO:0003674(molecular_function)|GO:0005575(cellular_component)|GO:0008150(biological_process)
A_84_P223559	-0.061698	-0.956838	-1.53875	-1.06034	-0.0367388	0.133596	-0.156042	0.414049	-0.0286622	0.767771	0.894822	0.706374	TC302039	AT2G14560.1	NM_127019	hypothetical protein	GO:0003674(molecular_function)|GO:0005575(cellular_component)|GO:0008150(biological_process)|GO:0009751(response to salicylic acid stimulus)|GO:0050832(defense response to fungus)
A_84_P14701	0.0245929	-0.863443	-0.962775	-0.893871	-0.0668651	-0.456535	-1.04525	-1.09102	-0.0205578	0.426913	0.750041	0.107265	TC282723	AT3G61880.1	NM_116053	CYP78A9 (CYTOCHROME P450 78A9); oxygen binding	GO:0004497(monooxygenase activity)|GO:0010154(fruit development)|GO:0012505(endomembrane system)|GO:0019825(oxygen binding)
A_84_P23021	0.243154	-0.644856	-1.40697	-1.17076	0.129721	0.159927	-0.920608	-0.206078	0.0159726	0.827091	1.17071	0.524057	TC312054	AT2G29090.1	NM_128466	CYP707A2 (cytochrome P450, family 707, subfamily A, polypeptide 2); oxygen binding	GO:0009639(response to red or far red light)|GO:0009687(abscisic acid metabolic process)|GO:0010114(response to red light)|GO:0010295((+)-abscisic acid 8'-hydroxylase activity)|GO:0012505(endomembrane system)|GO:0019825(oxygen binding)|GO:0048838(release of seed from dormancy)
A_84_P175491	0.312363	-0.571209	-0.643372	-0.19235	0.0229312	0.5566	0.319753	0.836455	0.00421764	-0.586906	0.212608	-0.86426		AT5G62520.1	NM_203252	SRO5 (SIMILAR TO RCD ONE 5); NAD+ ADP-ribosyltransferase	GO:0003950(NAD+ ADP-ribosyltransferase activity)|GO:0005739(mitochondrion)|GO:0006800(oxygen and reactive oxygen species metabolic process)|GO:0009651(response to salt stress)
A_84_P15036	-0.141001	-1.02173	-1.3698	-1.08115	-0.00228617	0.0815327	-0.462606	0.217486	0.0360709	0.675225	1.0547	0.59753	TC280877	AT5G60900.1	NM_125483	RLK1 (RECEPTOR-LIKE PROTEIN KINASE 1); carbohydrate binding / kinase	GO:0006468(protein amino acid phosphorylation)|GO:0012505(endomembrane system)|GO:0016301(kinase activity)|GO:0030246(carbohydrate binding)
A_84_P754645	-0.0985883	-0.978315	-1.1396	-0.946208	0.0067586	-0.196133	-0.276805	-0.294108	0.012378	0.093744	0.387898	-0.0353487		AT1G31540.2	NM_001123924	disease resistance protein (TIR-NBS-LRR class), putative	GO:0000166(nucleotide binding)|GO:0004888(transmembrane receptor activity)|GO:0005515(protein binding)|GO:0005524(ATP binding)|GO:0006952(defense response)|GO:0017111(nucleoside-triphosphatase activity)|GO:0031224(intrinsic to membrane)
A_84_P818265	0.0157802	-0.854606	-0.781658	-0.781575	0.00375874	-0.469184	0.563325	-0.666082	0.0313757	-0.473967	-0.612363	-0.129871	TC291797	AT4G32480.1	NM_119400	hypothetical protein	GO:0003674(molecular_function)|GO:0005575(cellular_component)|GO:0008150(biological_process)
A_84_P11287	-0.034146	-0.902613	-1.12785	-0.909359	-0.0253357	-0.334251	-0.931945	-0.720142	-0.0065812	0.631227	0.414685	0.235129	TC297457	AT5G15600.1	NM_121564	SP1L4 (SPIRAL1-LIKE4)	GO:0003674(molecular_function)|GO:0005575(cellular_component)|GO:0008150(biological_process)
A_84_P824268	0.155399	-0.709255	-0.359408	-0.581332	-0.00381935	1.36499	0.671733	0.801405	-0.0656676	0.812955	1.07017	0.0779954	TC289193	AT1G56660.1	NM_104542	hypothetical protein	GO:0003674(molecular_function)|GO:0005575(cellular_component)|GO:0008150(biological_process)
A_84_P59510	0.000273851	-0.861141	-0.834913	-0.888707	-0.00436498	-0.206412	0.613915	-0.463969	-0.00112829	-0.300934	-0.421249	0.0224737	TC291797	AT4G32480.1	NM_119400	hypothetical protein	GO:0003674(molecular_function)|GO:0005575(cellular_component)|GO:0008150(biological_process)
A_84_P15115	0.0495385	-0.811472	-1.24126	-0.386285	-0.000905626	0.677093	-0.383018	1.17473	0.00903949	0.236859	0.74377	0.33347	TC294658	AT3G24982.1	NM_113404	protein binding	GO:0005515(protein binding)|GO:0007165(signal transduction)|GO:0012505(endomembrane system)
A_84_P20155	0.00238096	-0.858121	-0.811432	-0.7328	0.00484271	-0.3107	-0.806301	-0.499984	0.00832328	0.513054	0.433432	0.287095	TC290958	AT2G46450.1	NM_180123	ATCNGC12 (cyclic nucleotide gated channel 12); cyclic nucleotide binding / ion channel	GO:0005216(ion channel activity)|GO:0005261(cation channel activity)|GO:0009620(response to fungus)|GO:0016020(membrane)|GO:0030551(cyclic nucleotide binding)
A_84_P21596	-0.188934	-1.04876	-1.35069	-1.33544	0.0239378	-0.237508	-1.09715	-0.783592	-0.00675785	0.50493	0.261369	0.337127		AT5G44530.1	NM_123820	subtilase family protein	GO:0004289(subtilase activity)|GO:0006508(proteolysis)|GO:0012505(endomembrane system)
A_84_P819549	0.272336	-0.575863	-0.174832	-0.538799	0.057118	1.82244	0.881654	1.23095	0.0356445	0.47707	1.03833	0.261102	TC295981	AT5G41740.1	NM_123539	disease resistance protein (TIR-NBS-LRR class), putative	GO:0000166(nucleotide binding)|GO:0004888(transmembrane receptor activity)|GO:0005515(protein binding)|GO:0005524(ATP binding)|GO:0006952(defense response)|GO:0009507(chloroplast)|GO:0017111(nucleoside-triphosphatase activity)|GO:0031224(intrinsic to membrane)
A_84_P23582	0.0119268	-0.833726	-0.948415	-1.01025	-0.0263438	-0.278007	-1.12595	-0.49096	0.00680237	0.0178483	0.345973	-0.518177	TC304672	AT5G15950.1	NM_121600	adenosylmethionine decarboxylase family protein	GO:0004014(adenosylmethionine decarboxylase activity)|GO:0005575(cellular_component)|GO:0006596(polyamine biosynthetic process)|GO:0006597(spermine biosynthetic process)|GO:0008295(spermidine biosynthetic process)
A_84_P15370	0.00516187	-0.837959	-0.697245	-0.759099	0.00221416	0.0752263	-0.205525	0.406183	-0.014841	0.493317	0.823042	1.08401	TC286577	AT1G04980.1	NM_100376	ATPDIL2-2 (PDI-LIKE 2-2); thiol-disulfide exchange intermediate	GO:0009505(plant-type cell wall)|GO:0030508(thiol-disulfide exchange intermediate activity)|GO:0045454(cell redox homeostasis)
A_84_P22977	0.250844	-0.585304	-1.358	-0.742931	0.0923939	-0.0857433	-1.33612	-0.489286	-0.00492696	1.12864	1.15801	1.23623	TC284970	AT2G23000.1	NM_127865	SCPL10 (serine carboxypeptidase-like 10); serine carboxypeptidase	GO:0004185(serine carboxypeptidase activity)|GO:0006508(proteolysis)|GO:0012505(endomembrane system)
A_84_P14878	-0.0230724	-0.855214	-0.841214	-0.8048	-0.00997035	-0.540411	-1.54022	-0.83353	-0.00707336	0.471411	0.948559	0.826754	TC289398	AT5G04950.1	NM_120577	nicotianamine synthase, putative	GO:0030410(nicotianamine synthase activity)
A_84_P260340	0.0654243	-0.763257	-1.06068	-0.727999	-0.0176637	-0.597491	-1.4645	-1.10133	0.0192201	0.950253	0.830579	0.484448	TC290373	AT1G76240.1	NM_106274	hypothetical protein	GO:0003674(molecular_function)|GO:0009507(chloroplast)
A_84_P825539	0.145	-0.674462	-0.867912	0.13026	0.0866748	1.34044	0.212009	1.50048	-0.0589276	2.45171	1.4065	1.76195	TC311978	AT1G32350.1	NM_102968	AOX1D (ALTERNATIVE OXIDASE 1D); alternative oxidase	GO:0005739(mitochondrion)|GO:0005740(mitochondrial envelope)|GO:0006118(electron transport)|GO:0009916(alternative oxidase activity)
A_84_P11046	0.32781	-0.49038	-0.0815723	-0.453461	-0.00555996	2.55234	0.941552	1.53478	-0.00761301	0.662289	1.79491	0.356032	TC292586	AT4G34410.1	NM_119606	AP2 domain-containing transcription factor, putative	GO:0003677(DNA binding)|GO:0003700(transcription factor activity)|GO:0005634(nucleus)|GO:0006355(regulation of transcription, DNA-dependent)
A_84_P858735	0.107402	-0.709322	-1.30925	-0.872942	0.00988192	-0.311066	-1.45599	-0.820237	-0.00607853	0.433012	0.258622	0.41403	TC311757	AT3G02870.2	NM_001035549	VTC4; 3'(2'),5'-bisphosphate nucleotidase/ L-galactose-1-phosphate phosphatase/ inositol or phosphatidylinositol phosphatase	GO:0004437(inositol or phosphatidylinositol phosphatase activity)|GO:0005575(cellular_component)|GO:0006790(sulfur metabolic process)|GO:0008441(3'(2'),5'-bisphosphate nucleotidase activity)|GO:0010347(L-galactose-1-phosphate phosphatase activity)|GO:0019853(L-ascorbic acid biosynthetic process)
A_84_P793001	0.0644315	-0.747512	-0.93577	-0.752538	0.0615796	1.54968	0.541957	0.897872	0.0419248	1.0622	1.39012	0.918804	TC280847	AT1G17420.1	NM_101603	LOX3 (Lipoxygenase 3); iron ion binding / lipoxygenase/ metal ion binding / oxidoreductase, acting on single donors with incorporation of molecular oxygen, incorporation of two atoms of oxygen	GO:0005506(iron ion binding)|GO:0006952(defense response)|GO:0009507(chloroplast)|GO:0009611(response to wounding)|GO:0009695(jasmonic acid biosynthetic process)|GO:0016165(lipoxygenase activity)|GO:0016702(oxidoreductase activity, acting on single donors with incorporation of molecular oxygen, incorporation of two atoms of oxygen)|GO:0040007(growth)|GO:0046872(metal ion binding)
A_84_P818437	0.364661	-0.44558	-0.202204	-0.367668	0.0411849	2.30651	1.35876	1.55198	0.00852192	1.0467	1.89362	0.729026	TC308071	AT5G42380.1	NM_123603	CML37/CML39; calcium ion binding	GO:0005509(calcium ion binding)|GO:0008150(biological_process)|GO:0009507(chloroplast)
A_84_P20170	0.0515688	-0.751194	-1.13125	-0.957946	0.00291989	-0.642928	-1.22646	-0.95745	-0.0387699	1.219	0.919893	1.12245	TC289724	AT2G01890.1	NM_126250	PAP8 (PURPLE ACID PHOSPHATASE PRECURSOR); acid phosphatase/ protein serine/threonine phosphatase	GO:0003993(acid phosphatase activity)|GO:0004722(protein serine/threonine phosphatase activity)|GO:0012505(endomembrane system)|GO:0016311(dephosphorylation)
A_84_P10559	0.204578	-0.593207	-0.691412	-0.583399	-0.0151928	0.884446	0.206984	0.636641	-0.0248191	0.738688	1.19631	0.456528	TC302718	AT1G01560.1	NM_001123738	ATMPK11 (Arabidopsis thaliana MAP kinase 11); MAP kinase/ kinase	GO:0004707(MAP kinase activity)|GO:0005575(cellular_component)|GO:0007165(signal transduction)|GO:0009737(response to abscisic acid stimulus)|GO:0016301(kinase activity)
A_84_P19573	0.0383313	-0.749106	-1.30544	-1.20248	0.0158764	-0.212522	-0.684171	-0.334982	-0.0176342	0.46234	0.839323	0.231754	NP221691	AT1G48100.1	NM_103706	glycoside hydrolase family 28 protein / polygalacturonase (pectinase) family protein	GO:0004650(polygalacturonase activity)|GO:0005975(carbohydrate metabolic process)
A_84_P245475	0.231916	-0.549529	-0.580478	-0.232361	-0.00896934	1.07044	0.605531	1.09526	-0.0024916	-0.123247	0.558559	-0.0804325	TC287210	AT2G25460.1	NM_128103	hypothetical protein	GO:0003674(molecular_function)|GO:0005575(cellular_component)|GO:0008150(biological_process)
A_84_P16510	-0.0866887	-0.861372	-0.767461	-0.893563	-0.0218047	0.240507	-0.102193	0.199579	-0.0532892	0.526572	0.912674	0.335683	TC312490	AT1G35710.1	NM_103273	leucine-rich repeat transmembrane protein kinase, putative	GO:0004674(protein serine/threonine kinase activity)|GO:0005524(ATP binding)|GO:0006468(protein amino acid phosphorylation)|GO:0007169(transmembrane receptor protein tyrosine kinase signaling pathway)|GO:0012505(endomembrane system)
A_84_P580314	-0.00112712	-0.772482	-1.40209	-1.1055	-0.0516044	0.010865	-0.155406	0.322028	0.0166902	0.792042	1.01749	0.975143	TC298904	AT3G22235.1	NM_180292	hypothetical protein	GO:0003674(molecular_function)|GO:0008150(biological_process)|GO:0012505(endomembrane system)
A_84_P762988	0.212927	-0.553582	-0.926462	-0.050685	0.0420904	1.20185	0.142467	1.14033	-0.0149765	0.594205	0.879177	1.06941	TC289689	AT4G36950.1	NM_001085035	MAPKKK21; ATP binding / protein kinase	GO:0004672(protein kinase activity)|GO:0005524(ATP binding)|GO:0006468(protein amino acid phosphorylation)
A_84_P284920	-0.166949	-0.932378	-1.12456	-1.0652	0.00594839	-0.668132	-1.49283	-0.905185	-0.00495887	0.67849	0.679993	0.506242	TC284758	AT3G01060.1	NM_110971	hypothetical protein	GO:0003674(molecular_function)|GO:0008150(biological_process)
A_84_P20509	0.135321	-0.621507	-0.952551	-0.694032	-0.0100444	0.0938266	-0.37605	-0.519334	-0.00448479	0.677532	0.353668	0.393306	TC287680	AT1G48260.1	NM_103723	CIPK17 (SNF1-RELATED PROTEIN KINASE 3.21); kinase	GO:0005575(cellular_component)|GO:0006468(protein amino acid phosphorylation)|GO:0007165(signal transduction)|GO:0016301(kinase activity)
A_84_P20605	-0.0508836	-0.807239	-1.17799	-0.608466	-0.047739	-0.127325	-0.778473	-0.0170009	0.0274429	0.59641	0.775192	0.711357	TC286904	AT5G24530.1	NM_122361	oxidoreductase, 2OG-Fe(II) oxygenase family protein	GO:0005575(cellular_component)|GO:0009813(flavonoid biosynthetic process)|GO:0016706(oxidoreductase activity, acting on paired donors, with incorporation or reduction of molecular oxygen, 2-oxoglutarate as one donor, and incorporation of one atom each of oxygen into both donors)
A_84_P66214	0.369477	-0.385791	-0.00783096	-0.345461	0.0565291	2.8141	1.53219	1.90803	-0.0418245	1.27156	2.26286	0.516687	TC287153	AT3G02840.1	NM_111152	immediate-early fungal elicitor family protein	GO:0005488(binding)|GO:0051707(response to other organism)
A_84_P250315	0.0135603	-0.735171	-0.568526	-0.333835	0.00589471	0.208938	-0.0204781	0.00108672	0.017932	0.820478	1.09302	0.652056	TC301672	AT2G18660.1	NM_179648	EXLB3 (EXPANSIN-LIKE B3 PRECURSOR)	GO:0005576(extracellular region)
A_84_P756652	-0.00389539	-0.751133	0.0350122	-0.603658	0.0734053	1.6652	1.27516	0.881568	0.0499504	1.03702	1.01337	0.335718	TC297539	AT2G35710.3	NM_201879	glycogenin glucosyltransferase (glycogenin)-related	GO:0009058(biosynthetic process)|GO:0012505(endomembrane system)|GO:0016051(carbohydrate biosynthetic process)|GO:0016757(transferase activity, transferring glycosyl groups)|GO:0016758(transferase activity, transferring hexosyl groups)
A_84_P20655	-0.123279	-0.868516	-1.26739	-0.915771	0.00817092	-0.921981	-1.40493	-2.08768	-0.00325013	0.0338368	-0.796661	-0.333938	TC311156	AT5G45830.1	NM_123951	DOG1 (DELAY OF GERMINATION 1)	GO:0003674(molecular_function)|GO:0005575(cellular_component)|GO:0010162(seed dormancy)
A_84_P515865	0.198974	-0.544471	-0.815554	-0.671148	-0.0833097	0.580653	-0.194476	0.236713	0.0214109	1.22134	1.32402	0.994404	TC309199	AT5G26690.1	NM_180545	heavy-metal-associated domain-containing protein	GO:0005575(cellular_component)|GO:0030001(metal ion transport)|GO:0046872(metal ion binding)
A_84_P14954	-0.173267	-0.91162	-1.4292	-1.15211	-0.000590127	-0.0493391	-0.831984	-0.466853	-0.0198264	1.4383	1.87527	1.48686	TC298622	AT1G73600.1	NM_001124125	phosphoethanolamine N-methyltransferase	GO:0000234(phosphoethanolamine N-methyltransferase activity)|GO:0008152(metabolic process)
A_84_P18763	-0.353959	-1.08638	-2.27952	-1.57592	0.0449253	-1.2414	-2.56224	-2.97506	0.0108599	0.747156	0.509062	0.267194	TC286694	AT5G45820.1	NM_123950	CIPK20 (CBL-INTERACTING PROTEIN KINASE 20); kinase	GO:0004674(protein serine/threonine kinase activity)|GO:0005829(cytosol)|GO:0009737(response to abscisic acid stimulus)|GO:0016301(kinase activity)
A_84_P12143	0.13074	-0.599961	0.136407	-0.44604	0.0375713	1.67642	0.672546	1.01257	0.0133993	-0.0803461	0.693755	-0.512615	TC283689	AT5G45340.1	NM_180805	CYP707A3 (cytochrome P450, family 707, subfamily A, polypeptide 3); oxygen binding	GO:0009414(response to water deprivation)|GO:0009639(response to red or far red light)|GO:0010295((+)-abscisic acid 8'-hydroxylase activity)|GO:0012505(endomembrane system)|GO:0019825(oxygen binding)|GO:0046345(abscisic acid catabolic process)
A_84_P824264	0.0359187	-0.69022	-0.210437	-0.642874	-0.0238676	1.47346	0.958605	1.09505	0.116453	1.04238	1.22918	0.342463		TA39749_3702
A_84_P19923	0.0158446	-0.706665	-0.420467	-0.349777	0.00875875	0.612237	0.820131	0.68426	0.0188463	0.673407	0.736664	0.387467	TC286284	AT1G05680.1	NM_100448	UDP-glucoronosyl/UDP-glucosyl transferase family protein	GO:0005575(cellular_component)|GO:0008152(metabolic process)|GO:0008194(UDP-glycosyltransferase activity)|GO:0016757(transferase activity, transferring glycosyl groups)|GO:0016758(transferase activity, transferring hexosyl groups)
A_84_P103716	-0.138355	-0.856468	-1.32598	-0.915789	-0.0332979	-0.167592	-0.834761	0.162301	0.0281487	1.19318	1.2002	1.64864	TC292333	AT5G03350.1	NM_120414	legume lectin family protein	GO:0008150(biological_process)|GO:0012505(endomembrane system)|GO:0030246(carbohydrate binding)
A_84_P755281	0.0539352	-0.657062	-0.371946	-0.659964	0.00123595	1.89565	0.516779	0.935006	-0.0288853	0.69268	1.33019	0.265544	TC295634	AT2G05050.1	NM_113628	pseudo
A_84_P824195	-0.0166197	-0.727381	-0.272627	-0.432194	0.032297	-0.231867	0.0920723	-0.222715	0.000205081	-0.794606	-1.09748	-0.643221	NP456155	AT2G23690.1	NM_127932	hypothetical protein	GO:0003674(molecular_function)|GO:0005575(cellular_component)|GO:0006499(N-terminal protein myristoylation)
A_84_P17313	-0.0869198	-0.796733	-0.94878	-0.50918	0.00230126	0.110522	-0.120882	0.85286	-0.0241117	-0.976517	-0.174993	-1.11214	TC292307	AT2G37770.1	NM_001036428	aldo/keto reductase family protein	GO:0016491(oxidoreductase activity)
A_84_P602094	0.0227553	-0.686726	-0.363257	-0.63216	0.0290992	1.32244	1.00136	0.78195	-0.00752741	1.00997	1.16838	0.43441	TC298012	AT5G54720.1	NM_124853	ankyrin repeat family protein	GO:0005515(protein binding)|GO:0005575(cellular_component)|GO:0008150(biological_process)
A_84_P592168	0.0505866	-0.654361	-0.428068	-0.368579	0.0170883	0.812696	0.761176	0.571497	-0.0209834	0.414803	0.900033	0.179122	NP237434	AT5G05300.1	NM_120612	hypothetical protein	GO:0003674(molecular_function)|GO:0008150(biological_process)|GO:0012505(endomembrane system)
A_84_P23973	-0.186304	-0.887715	-1.22955	-0.942432	-0.0552158	-0.566374	-1.48608	-0.615454	-0.00435901	0.387428	0.752076	0.928526	TC307964	AT3G03780.2	NM_111249	AtMS2 (Arabidopsis thaliana methionine synthase 2); 5-methyltetrahydropteroyltriglutamate-homocysteine S-methyltransferase	GO:0003871(5-methyltetrahydropteroyltriglutamate-homocysteine S-methyltransferase activity)|GO:0005829(cytosol)|GO:0008705(methionine synthase activity)|GO:0009086(methionine biosynthetic process)
A_84_P11607	0.288577	-0.406728	-0.600609	0.139486	-0.0229387	0.33988	0.00538668	1.40207	0.0515424	0.578725	1.0774	0.375263	TC284137	AT2G45570.1	NM_130119	CYP76C2 (cytochrome P450, family 76, subfamily C, polypeptide 2); oxygen binding	GO:0006118(electron transport)|GO:0019825(oxygen binding)

## Sheet: WoA>Mp-3h
WoA>Mp-3h
Type	without aphid	M. cerasi	M. persicae	R. padi	without aphid	M. cerasi	M. persicae	R. padi	without aphid	M. cerasi	M. persicae	R. padi
Time	3h				6h				24h
Systematic	log2												TIGRID	At accession	GenbankAccession	Gene function	GO
A_84_P22906	0.575214	-0.0330309	-2.88598	0.791332	-0.0730049	0.534324	1.53571	2.16575	-0.0205059	0.220723	2.14086	0.176757	TC282618	AT2G42560.1	NM_129817	late embryogenesis abundant domain-containing protein / LEA domain-containing protein	GO:0003674(molecular_function)|GO:0005575(cellular_component)|GO:0009793(embryonic development ending in seed dormancy)
A_84_P186914	0.547502	-0.768875	-2.72615	0.121402	0.0154602	0.470391	-0.722816	0.265655	-0.0089893	1.74887	2.0105	1.88959	TC286860	AT3G11480.1	NM_111981	BSMT1; S-adenosylmethionine-dependent methyltransferase	GO:0005575(cellular_component)|GO:0006952(defense response)|GO:0008757(S-adenosylmethionine-dependent methyltransferase activity)|GO:0009611(response to wounding)|GO:0051707(response to other organism)
A_84_P305070	0.11401	-2.75641	-2.99878	-2.22718	0.0351296	-1.23396	-2.71394	-2.08326	0.0190402	2.38675	2.63684	1.32617	TC284320	AT2G15020.1	NM_127064	hypothetical protein	GO:0003674(molecular_function)|GO:0005575(cellular_component)|GO:0008150(biological_process)
A_84_P836671	0.14495	-1.85467	-2.91599	-2.12048	0.0118517	-0.67648	-1.66892	-1.85388	0.00197645	1.69531	1.37426	1.50242	TC300702	TA52555_3702
A_84_P739644	0.251293	-2.09481	-2.59845	-1.89072	-0.0422895	-0.978726	-1.87021	-1.3291	0.00741472	1.33894	1.55866	1.17321		AT1G70260.1	NM_105694	nodulin MtN21 family protein	GO:0003674(molecular_function)|GO:0016020(membrane)
A_84_P18640	0.679823	-1.00839	-1.88603	-1.6659	-0.164253	2.46738	-0.303202	2.43903	-0.0381801	1.29606	1.61885	3.22519	TC282751	AT4G16590.1	NM_117760	ATCSLA01 (Cellulose synthase-like A1); glucosyltransferase/ transferase, transferring glycosyl groups	GO:0005575(cellular_component)|GO:0008150(biological_process)|GO:0016757(transferase activity, transferring glycosyl groups)|GO:0016759(cellulose synthase activity)|GO:0046527(glucosyltransferase activity)
A_84_P19241	-0.237307	-2.7187	-2.7895	-2.17185	0.0290967	-1.58037	-1.96908	-1.78337	-0.0142357	0.0533761	0.12892	-0.364137	TC284054	AT2G46830.1	NM_180129	CCA1 (CIRCADIAN CLOCK ASSOCIATED 1); transcription factor	GO:0003677(DNA binding)|GO:0003700(transcription factor activity)|GO:0007623(circadian rhythm)|GO:0009651(response to salt stress)|GO:0009723(response to ethylene stimulus)|GO:0009733(response to auxin stimulus)|GO:0009737(response to abscisic acid stimulus)|GO:0009739(response to gibberellin stimulus)|GO:0009751(response to salicylic acid stimulus)|GO:0009753(response to jasmonic acid stimulus)|…
A_84_P93089	-0.535617	-1.91989	-3.08694	-2.3149	-0.00533262	-1.14504	-2.10308	-1.56106	0.00959158	1.68369	1.41505	1.49537	TC292156	AT1G13650.1	NM_179324	hypothetical protein	GO:0003674(molecular_function)|GO:0005575(cellular_component)|GO:0008150(biological_process)
A_84_P258120	0.329525	-1.16534	-2.07753	-0.824362	-0.153152	2.75858	2.89738	2.73156	-0.0990434	-0.862536	-1.32771	-1.08132	TC303895	AT1G75830.1	NM_106233	LCR67/PDF1.1 (Low-molecular-weight cysteine-rich 67)	GO:0003674(molecular_function)|GO:0005618(cell wall)|GO:0006952(defense response)
A_84_P16903	0.1394	-1.47832	-2.2541	-1.66535	-0.0424249	0.0101989	-1.14518	-0.154048	-0.0205537	1.404	1.53838	1.16729	TC295859	AT5G54610.1	NM_124842	ANK (ANKYRIN); protein binding	GO:0005515(protein binding)|GO:0005575(cellular_component)|GO:0009751(response to salicylic acid stimulus)
A_84_P720334	0.723779	-0.888609	-1.669	-1.8158	0.041933	2.9504	0.778746	0.547052	0.0344561	2.54241	3.11266	0.624213		TA29990_3702
A_84_P145159	0.540552	0.586263	-1.83642	-0.181731	0.0507391	0.656352	0.872305	1.45042	-0.00644353	-0.93074	0.376799	-1.42728	TC288653	AT5G50360.1	NM_124417	hypothetical protein	GO:0003674(molecular_function)|GO:0008150(biological_process)
A_84_P764402	0.360826	-0.547274	-1.98391	-0.198881	0.0466164	0.353311	-1.55504	-0.292589	0.0575221	1.41462	1.53825	1.84106	TC301005	AT4G16740.1	NM_001036574	ATTPS03 (Arabidopsis thaliana terpene synthase 03)	GO:0009611(response to wounding)|GO:0016099(monoterpenoid biosynthetic process)|GO:0042408(myrcene/(E)-beta-ocimene synthase activity)
A_84_P16037	0.386195	-0.186809	-1.92995	-0.837798	0.0412794	-0.2673	-1.84496	-0.849709	0.0361182	0.746597	1.47128	1.02131	TC291247	AT1G56650.1	NM_104541	PAP1 (PRODUCTION OF ANTHOCYANIN PIGMENT 1); DNA binding / transcription factor	GO:0003677(DNA binding)|GO:0003700(transcription factor activity)|GO:0003993(acid phosphatase activity)|GO:0004722(protein serine/threonine phosphatase activity)|GO:0006355(regulation of transcription, DNA-dependent)|GO:0008150(biological_process)|GO:0009651(response to salt stress)|GO:0009718(anthocyanin biosynthetic process)|GO:0009733(response to auxin stimulus)|GO:0009745(sucrose mediated sig…
A_84_P845388	0.0918041	-2.18551	-2.22352	-2.16698	0.041933	0.618095	0.566162	0.296141	0.0857754	-0.113305	0.233436	-0.296946	TC290515	TC290515			GO:0008152(metabolic process)|GO:0016491(oxidoreductase activity)
A_84_P19231	0.26897	-1.45722	-1.99364	-1.32525	0.014891	-1.02319	0.595363	-1.63351	-0.0413012	-0.783157	-0.611762	-1.52604	TC289736	AT2G26150.1	NM_001124916	ATHSFA2 (Arabidopsis thaliana heat shock transcription factor A2)	GO:0003677(DNA binding)|GO:0003700(transcription factor activity)|GO:0005634(nucleus)|GO:0009408(response to heat)|GO:0009644(response to high light intensity)|GO:0012505(endomembrane system)|GO:0042542(response to hydrogen peroxide)
A_84_P22334	0.114804	-1.41415	-2.11871	-1.92505	0.000336565	-0.728642	-0.116133	-1.45583	-0.00764012	0.411661	-0.0139118	-0.148959	TC284168	AT4G20820.1	NM_118200	FAD-binding domain-containing protein	GO:0006118(electron transport)|GO:0009055(electron carrier activity)
A_84_P751150	0.518198	-1.11539	-1.68838	-1.26598	0.0316473	0.660124	0.276084	0.790711	0.0231487	1.19608	0.993629	1.30026	NP041492	AT1G02230.1	NM_100104	ANAC004 (Arabidopsis NAC domain containing protein 4); transcription factor	GO:0003700(transcription factor activity)|GO:0005575(cellular_component)|GO:0007275(multicellular organismal development)
A_84_P513574	0.0140557	-1.48627	-2.17041	-1.7223	-0.00708549	-0.0434734	0.0914289	0.159305	0.0294272	0.819665	1.02401	0.826605	TC304936	AT2G14560.2	NM_201727	hypothetical protein	GO:0003674(molecular_function)|GO:0005575(cellular_component)|GO:0008150(biological_process)|GO:0009751(response to salicylic acid stimulus)|GO:0050832(defense response to fungus)
A_84_P11914	0.187929	-1.88766	-1.90934	-1.80339	-0.0201813	-1.289	0.492591	-1.48912	0.0317133	-0.785089	-0.892602	-0.918503	TC297656	AT4G12400.1	NM_117310	stress-inducible protein, putative	GO:0005488(binding)|GO:0005575(cellular_component)|GO:0006950(response to stress)|GO:0009408(response to heat)|GO:0009644(response to high light intensity)|GO:0042542(response to hydrogen peroxide)
A_84_P18192	0.360834	-0.714216	-1.68713	-1.22245	-0.0217132	-0.213238	-1.80468	-0.756499	0.00147797	0.926656	0.635786	0.8246	TC311043	AT2G20750.1	NM_127640	ATEXPB1 (ARABIDOPSIS THALIANA EXPANSIN B1)	GO:0003674(molecular_function)|GO:0005576(extracellular region)|GO:0009664(plant-type cell wall organization and biogenesis)|GO:0009826(unidimensional cell growth)|GO:0009828(plant-type cell wall loosening)|GO:0012505(endomembrane system)
A_84_P592948	0.0280114	0.375188	-1.97747	-0.333545	0.0467611	-0.172036	-2.09394	0.524241	0.00512303	-1.0874	-1.16058	0.404125	TC285908	AT4G11911.1	NM_001125495	hypothetical protein	GO:0009507(chloroplast)
A_84_P13983	-0.0492096	-1.7026	-2.05362	-1.68165	-0.0452472	-0.909871	-1.41345	-1.49735	0.0593804	0.728037	0.607277	0.0289323	TC291213	AT5G24120.1	NM_122317	SIGE (RNA polymerase sigma subunit E); DNA binding / DNA-directed RNA polymerase/ sigma factor/ transcription factor	GO:0003677(DNA binding)|GO:0003700(transcription factor activity)|GO:0003899(DNA-directed RNA polymerase activity)|GO:0006352(transcription initiation)|GO:0006355(regulation of transcription, DNA-dependent)|GO:0010114(response to red light)|GO:0010218(response to far red light)|GO:0016987(sigma factor activity)
A_84_P14274	-0.187554	1.08821	-2.17538	0.709487	-0.0219094	0.428927	1.05444	1.36196	-0.0142419	-0.358652	0.736392	-0.269989	TC292541	AT1G52690.1	NM_202280	late embryogenesis abundant protein, putative / LEA protein, putative	GO:0003674(molecular_function)|GO:0005575(cellular_component)|GO:0009793(embryonic development ending in seed dormancy)
A_84_P549850	0.153295	0.115667	-1.82355	-0.542944	-0.0574618	0.458239	0.697862	1.23456	0.0265281	-1.24298	0.424401	-1.39967	TC306656	AT1G60190.1	NM_104709	armadillo/beta-catenin repeat family protein / U-box domain-containing protein	GO:0000151(ubiquitin ligase complex)|GO:0004842(ubiquitin-protein ligase activity)|GO:0005488(binding)|GO:0005515(protein binding)|GO:0008270(zinc ion binding)|GO:0016567(protein ubiquitination)
A_84_P757222	-0.0166389	0.0080127	-1.98401	-0.889371	-0.0222695	-0.921129	-1.56019	-0.350551	0.0303594	1.09347	1.45411	1.70598		AT2G16367.1		pseudo
A_84_P115562	0.103471	-0.186035	-1.85996	-0.952615	-0.0147207	1.18835	-0.31282	1.86243	-0.00438913	1.35624	1.93894	2.66974	NP282090	AT1G73325.1	NM_105992	trypsin and protease inhibitor family protein / Kunitz family protein	GO:0004866(endopeptidase inhibitor activity)|GO:0008150(biological_process)|GO:0012505(endomembrane system)
A_84_P595614	0.318823	-1.53262	-1.63489	-1.70391	-0.069733	0.785095	0.0280314	0.56861	0.00844701	1.49494	1.89553	1.36589	TC282027	AT4G14390.1	NM_117518	ankyrin repeat family protein	GO:0003674(molecular_function)|GO:0005575(cellular_component)|GO:0008150(biological_process)
A_84_P805566	0.139137	0.469118	-1.80909	-0.539727	-0.00477324	0.240783	-0.117849	0.890359	0.0138173	-0.929528	-0.784268	0.879857		AT5G24780.1	NM_122387	VSP1 (VEGETATIVE STORAGE PROTEIN 1)	GO:0003993(acid phosphatase activity)|GO:0006952(defense response)|GO:0008134(transcription factor binding)|GO:0009753(response to jasmonic acid stimulus)|GO:0012505(endomembrane system)
A_84_P235073	-0.306987	-1.57466	-2.23314	-1.81548	-0.0623371	-1.1336	-1.99309	-2.11034	-0.018332	0.588308	0.38209	0.0591216	TC288208	AT1G73870.1	NM_106047	zinc finger (B-box type) family protein	GO:0003700(transcription factor activity)|GO:0005622(intracellular)|GO:0008270(zinc ion binding)|GO:0045449(regulation of transcription)
A_84_P18763	-0.353959	-1.08638	-2.27952	-1.57592	0.0449253	-1.2414	-2.56224	-2.97506	0.0108599	0.747156	0.509062	0.267194	TC286694	AT5G45820.1	NM_123950	CIPK20 (CBL-INTERACTING PROTEIN KINASE 20); kinase	GO:0004674(protein serine/threonine kinase activity)|GO:0005829(cytosol)|GO:0009737(response to abscisic acid stimulus)|GO:0016301(kinase activity)
A_84_P756427	0.558758	-0.886325	-1.35573	-0.21449	0.0353775	1.03248	-0.860574	-0.0544207	-0.0252085	3.12112	3.59135	2.26877	TC289330	AT2G27420.1	NM_128302	cysteine proteinase, putative	GO:0006508(proteolysis)|GO:0008234(cysteine-type peptidase activity)|GO:0012505(endomembrane system)
A_84_P21186	0.033853	-0.910912	-1.86163	-1.26566	0.0168237	-0.330275	-0.973061	-0.469023	-0.00969861	1.19877	1.05831	0.898566	TC282193	AT3G21670.1	NM_113062	nitrate transporter (NTP3)	GO:0005215(transporter activity)|GO:0006857(oligopeptide transport)|GO:0016020(membrane)
A_84_P18401	0.0445309	-1.4277	-1.84511	-1.17249	-0.0333127	-0.695686	0.335116	-1.10851	-0.0260529	-0.288093	-0.227118	-0.750427	TC281774	AT3G12580.1	NM_112093	HSP70 (heat shock protein 70); ATP binding	GO:0005524(ATP binding)|GO:0005829(cytosol)|GO:0006457(protein folding)|GO:0009408(response to heat)|GO:0009615(response to virus)|GO:0009617(response to bacterium)|GO:0009644(response to high light intensity)|GO:0042542(response to hydrogen peroxide)
A_84_P841862	-0.0269878	-0.565526	-1.8903	-0.954702	0.00884613	-0.251132	-0.650496	0.0572	-0.0201714	-2.61756	-1.57368	-2.50328	NP230452	AT5G53710.1	NM_124750	hypothetical protein	GO:0003674(molecular_function)|GO:0008150(biological_process)|GO:0012505(endomembrane system)
A_84_P12551	0.212147	-0.840856	-1.64987	-0.119256	0.0654109	1.27387	1.38295	1.7918	0.0369793	1.22213	0.920275	2.11075	TC294659	AT2G29470.1	NM_128501	ATGSTU3 (GLUTATHIONE S-TRANSFERASE 21); glutathione transferase	GO:0004364(glutathione transferase activity)|GO:0005737(cytoplasm)|GO:0009407(toxin catabolic process)
A_84_P847162	0.331211	0.0347266	-1.52093	0.189144	0.0101395	0.0130561	-2.18751	-0.932198	-0.03157	1.58081	1.60311	1.60621	TC298912	AT4G16740.2	NM_001036574	ATTPS03 (Arabidopsis thaliana terpene synthase 03)	GO:0009611(response to wounding)|GO:0016099(monoterpenoid biosynthetic process)|GO:0042408(myrcene/(E)-beta-ocimene synthase activity)
A_84_P11248	0.151403	0.104923	-1.69552	-0.543749	0.00305402	-0.198286	-0.243645	0.543198	0.0327786	-1.43964	-0.628425	-1.54821	TC284619	AT5G59220.1	NM_125312	protein phosphatase 2C, putative / PP2C, putative	GO:0004722(protein serine/threonine phosphatase activity)|GO:0009507(chloroplast)|GO:0009737(response to abscisic acid stimulus)
A_84_P863449	0.241232	0.937236	-1.57118	0.0221455	0.0326612	0.473553	0.602148	1.74858	-0.0561859	-1.43353	-0.18158	-1.31012	TC314293	AT2G47770.1	NM_130344	benzodiazepine receptor-related	GO:0003674(molecular_function)|GO:0008150(biological_process)|GO:0016021(integral to membrane)
A_84_P12851	0.423899	-0.581646	-1.37391	-0.801504	-0.0351107	1.02286	-0.262897	0.655763	-0.0149577	1.18568	1.43506	0.879162	TC287934	AT4G10500.1	NM_117118	oxidoreductase, 2OG-Fe(II) oxygenase family protein	GO:0016706(oxidoreductase activity, acting on paired donors, with incorporation or reduction of molecular oxygen, 2-oxoglutarate as one donor, and incorporation of one atom each of oxygen into both donors)|GO:0019748(secondary metabolic process)
A_84_P19508	-0.0239669	-1.14441	-1.75411	-1.19285	-0.0743364	-0.564433	-1.2713	-0.441353	-0.0369199	-0.258872	0.00881276	-0.481631	TC299672	AT4G23680.1	NM_118499	major latex protein-related / MLP-related	GO:0003674(molecular_function)|GO:0005575(cellular_component)|GO:0006952(defense response)|GO:0009607(response to biotic stimulus)
A_84_P857762	-0.0655963	0.132568	-1.7305	-0.728621	-0.00868303	-0.105077	-0.267456	0.199518	-0.00285764	-0.317474	0.074138	0.69995	TC311210	U74122
A_84_P17111	0.336474	-0.942982	-1.32359	-0.782204	-0.062162	-0.316536	-0.963339	-0.61672	0.0204559	1.26077	1.59737	0.802486	TC296923	AT1G02820.1	NM_100163	late embryogenesis abundant 3 family protein / LEA3 family protein	GO:0003674(molecular_function)|GO:0009790(embryonic development)
A_84_P23021	0.243154	-0.644856	-1.40697	-1.17076	0.129721	0.159927	-0.920608	-0.206078	0.0159726	0.827091	1.17071	0.524057	TC312054	AT2G29090.1	NM_128466	CYP707A2 (cytochrome P450, family 707, subfamily A, polypeptide 2); oxygen binding	GO:0009639(response to red or far red light)|GO:0009687(abscisic acid metabolic process)|GO:0010114(response to red light)|GO:0010295((+)-abscisic acid 8'-hydroxylase activity)|GO:0012505(endomembrane system)|GO:0019825(oxygen binding)|GO:0048838(release of seed from dormancy)
A_84_P146938	0.536607	-0.091193	-1.1007	-0.598836	-0.0480757	1.44651	-0.0916151	1.05803	-0.0180972	1.79835	1.76902	1.78735	TC298273	AT1G02450.1	NM_100126	NIMIN-1/NIMIN1; protein binding	GO:0005515(protein binding)|GO:0005575(cellular_component)|GO:0010112(regulation of systemic acquired resistance)|GO:0016481(negative regulation of transcription)|GO:0042742(defense response to bacterium)
A_84_P18335	0.410985	0.501028	-1.21733	0.319677	0.00831316	0.56604	-0.100144	1.09066	0.00989299	0.1636	1.15894	-0.795292	TC302341	AT3G02480.1	NM_111115	ABA-responsive protein-related	GO:0003674(molecular_function)|GO:0005575(cellular_component)|GO:0008150(biological_process)
A_84_P17207	0.410168	-0.618081	-1.21693	-0.967265	0.000895666	0.290447	-0.621342	-0.0936418	0.00958159	1.58891	2.10258	1.36588	TC287417	AT1G57590.1	NM_104556	carboxylesterase	GO:0004091(carboxylesterase activity)|GO:0008150(biological_process)
A_84_P22977	0.250844	-0.585304	-1.358	-0.742931	0.0923939	-0.0857433	-1.33612	-0.489286	-0.00492696	1.12864	1.15801	1.23623	TC284970	AT2G23000.1	NM_127865	SCPL10 (serine carboxypeptidase-like 10); serine carboxypeptidase	GO:0004185(serine carboxypeptidase activity)|GO:0006508(proteolysis)|GO:0012505(endomembrane system)
A_84_P50530	-0.14774	-0.472447	-1.75198	-0.829481	-0.037598	-0.286126	-0.440946	0.0800488	-0.00291531	-2.24961	-0.873557	-2.07063	TC298626	AT5G53710.1	NM_124750	hypothetical protein	GO:0003674(molecular_function)|GO:0008150(biological_process)|GO:0012505(endomembrane system)
A_84_P17828	0.186887	-1.29297	-1.41624	-1.23292	-0.0245516	-0.874558	0.388614	-1.36444	0.0308015	-0.302267	-0.203721	-0.578177	TC304278	AT5G48570.1	NM_124233	peptidyl-prolyl cis-trans isomerase, putative / FK506-binding protein, putative	GO:0003755(peptidyl-prolyl cis-trans isomerase activity)|GO:0005516(calmodulin binding)|GO:0005528(FK506 binding)|GO:0005575(cellular_component)|GO:0006457(protein folding)
A_84_P12395	-0.00747176	-1.30078	-1.60588	-1.21226	-0.0112306	-0.969539	-1.12192	-1.03149	-0.0586953	0.712087	1.06426	0.538642	TC307856	AT1G32900.1	NM_103023	starch synthase, putative	GO:0009058(biosynthetic process)|GO:0009250(glucan biosynthetic process)|GO:0009507(chloroplast)|GO:0016757(transferase activity, transferring glycosyl groups)
A_84_P186924	0.0995843	-1.09341	-1.48102	-1.2276	0.00408514	0.120221	-0.42021	0.00215333	-0.00241363	0.579908	0.920704	0.339717	TC281125	AT1G65790.1	NM_105252	ARK1 (A. THALIANA RECEPTOR KINASE I); kinase	GO:0004674(protein serine/threonine kinase activity)|GO:0006468(protein amino acid phosphorylation)|GO:0009875(pollen-pistil interaction)|GO:0016020(membrane)|GO:0016301(kinase activity)|GO:0019199(transmembrane receptor protein kinase activity)
A_84_P20292	-0.320637	-2.05529	-1.88551	-1.90294	-0.0297273	-1.2829	-1.42994	-1.50009	0.00956328	0.292043	0.180949	-0.203656	TC293154	AT3G02380.1	NM_111105	COL2 (CONSTANS-LIKE 2); transcription factor/ zinc ion binding	GO:0003700(transcription factor activity)|GO:0005622(intracellular)|GO:0008270(zinc ion binding)|GO:0009909(regulation of flower development)
A_84_P541401	0.315418	0.181387	-1.24512	0.355642	0.016559	0.522481	-1.8685	0.0954837	-0.101935	0.58441	1.10443	0.956884	TC292644	AT4G18425.1	NM_117955	hypothetical protein	GO:0003674(molecular_function)|GO:0005575(cellular_component)|GO:0008150(biological_process)
A_84_P12560	-0.0981687	-1.23367	-1.65622	-1.38297	-0.0514237	-1.06929	-1.59334	-1.53197	0.022401	0.466588	0.32164	0.0138812	TC293522	AT2G31380.1	NM_128695	STH (salt tolerance homologue); transcription factor/ zinc ion binding	GO:0003700(transcription factor activity)|GO:0005622(intracellular)|GO:0008270(zinc ion binding)|GO:0012505(endomembrane system)|GO:0019904(protein domain specific binding)|GO:0045449(regulation of transcription)
A_84_P109472	0.0678617	1.1219	-1.43942	0.048151	-0.012785	0.527187	0.92526	1.91265	0.0276808	-1.60114	-0.122708	-1.54889	TC311639	AT2G47770.1	NM_130344	benzodiazepine receptor-related	GO:0003674(molecular_function)|GO:0008150(biological_process)|GO:0016021(integral to membrane)
A_84_P223559	-0.061698	-0.956838	-1.53875	-1.06034	-0.0367388	0.133596	-0.156042	0.414049	-0.0286622	0.767771	0.894822	0.706374	TC302039	AT2G14560.1	NM_127019	hypothetical protein	GO:0003674(molecular_function)|GO:0005575(cellular_component)|GO:0008150(biological_process)|GO:0009751(response to salicylic acid stimulus)|GO:0050832(defense response to fungus)
A_84_P74014	-0.0642989	-0.473163	-1.52416	-0.815377	0.0124204	1.77154	1.2386	1.78204	-0.0122454	0.821298	0.620529	0.939483	TC297576	AT3G11340.1	NM_111968	UDP-glucoronosyl/UDP-glucosyl transferase family protein	GO:0008152(metabolic process)|GO:0008194(UDP-glycosyltransferase activity)|GO:0012505(endomembrane system)
A_84_P97476	-0.195448	0.333178	-1.65339	-0.651435	0.0152211	0.197973	0.0982033	0.935956	0.00695283	-1.06074	-0.963938	0.666579	TC312123	AT5G24780.1	NM_122387	VSP1 (VEGETATIVE STORAGE PROTEIN 1)	GO:0003993(acid phosphatase activity)|GO:0006952(defense response)|GO:0008134(transcription factor binding)|GO:0009753(response to jasmonic acid stimulus)|GO:0012505(endomembrane system)
A_84_P752590	0.269068	-0.420475	-1.16648	-0.301197	0.00882051	-0.186133	-1.77144	-0.61062	0.00825722	0.449555	0.885642	1.23886	TC283809	AT1G16410.1	NM_202111	CYP79F1 (SUPERSHOOT 1)	GO:0005783(endoplasmic reticulum)|GO:0016709(oxidoreductase activity, acting on paired donors, with incorporation or reduction of molecular oxygen, NADH or NADPH as one donor, and incorporation of one atom of oxygen)|GO:0019761(glucosinolate biosynthetic process)
A_84_P858735	0.107402	-0.709322	-1.30925	-0.872942	0.00988192	-0.311066	-1.45599	-0.820237	-0.00607853	0.433012	0.258622	0.41403	TC311757	AT3G02870.2	NM_001035549	VTC4; 3'(2'),5'-bisphosphate nucleotidase/ L-galactose-1-phosphate phosphatase/ inositol or phosphatidylinositol phosphatase	GO:0004437(inositol or phosphatidylinositol phosphatase activity)|GO:0005575(cellular_component)|GO:0006790(sulfur metabolic process)|GO:0008441(3'(2'),5'-bisphosphate nucleotidase activity)|GO:0010347(L-galactose-1-phosphate phosphatase activity)|GO:0019853(L-ascorbic acid biosynthetic process)
A_84_P18655	0.264513	-0.289329	-1.15044	-0.86728	-0.0436887	-0.300851	-0.810561	-0.202567	0.0639935	0.64228	1.03637	0.465791	NP173293	AT1G62710.1	NM_104948	BETA-VPE (vacuolar processing enzyme beta); cysteine-type endopeptidase	GO:0004197(cysteine-type endopeptidase activity)|GO:0006508(proteolysis)|GO:0006624(vacuolar protein processing)|GO:0012505(endomembrane system)
A_84_P580314	-0.00112712	-0.772482	-1.40209	-1.1055	-0.0516044	0.010865	-0.155406	0.322028	0.0166902	0.792042	1.01749	0.975143	TC298904	AT3G22235.1	NM_180292	hypothetical protein	GO:0003674(molecular_function)|GO:0008150(biological_process)|GO:0012505(endomembrane system)
A_84_P23899	0.10609	-1.18097	-1.29066	-0.866584	0.00698021	0.172133	0.276342	0.330233	-0.0123544	0.0711114	0.156831	0.166435	TC297610	AT2G29500.1	NM_128504	17.6 kDa class I small heat shock protein (HSP17.6B-CI)	GO:0003674(molecular_function)|GO:0006979(response to oxidative stress)|GO:0009408(response to heat)|GO:0009644(response to high light intensity)|GO:0042542(response to hydrogen peroxide)
A_84_P559896	0.110921	-0.818671	-1.28407	-0.928317	-0.0206494	-0.279927	-1.85602	-1.14309	-0.034546	0.813018	1.15871	0.35762	TC302010	AT3G44450.1	NM_114313	hypothetical protein	GO:0003674(molecular_function)|GO:0005575(cellular_component)|GO:0008150(biological_process)
A_84_P19718	0.0285663	-0.512602	-1.32702	-0.886274	-0.00528069	-1.32124	-1.80989	-1.15281	-0.0340675	-1.44612	-0.605414	-0.162626	TC306548	AT5G48000.1	NM_001125923	CYP708A2 (cytochrome P450, family 708, subfamily A, polypeptide 2); oxygen binding	GO:0005783(endoplasmic reticulum)|GO:0019825(oxygen binding)|GO:0048364(root development)
A_84_P21945	0.136249	-1.11229	-1.21268	-0.353167	-0.0355352	1.00335	0.316069	1.14358	0.018941	2.32358	1.46816	1.56466	TC286535	AT1G32350.1	NM_102968	AOX1D (ALTERNATIVE OXIDASE 1D); alternative oxidase	GO:0005739(mitochondrion)|GO:0005740(mitochondrial envelope)|GO:0006118(electron transport)|GO:0009916(alternative oxidase activity)
A_84_P813784	-0.160577	-0.429764	-1.50862	-1.11169	-0.0386861	-0.394921	-1.13267	-0.811384	-0.0103962	0.143527	0.804561	-0.144869	TC281050	AT2G39800.2	NM_201912	P5CS1 (DELTA1-PYRROLINE-5-CARBOXYLATE SYNTHASE 1)	GO:0005737(cytoplasm)|GO:0006561(proline biosynthetic process)|GO:0006979(response to oxidative stress)|GO:0009269(response to desiccation)|GO:0009414(response to water deprivation)|GO:0009507(chloroplast)|GO:0009651(response to salt stress)|GO:0009737(response to abscisic acid stimulus)|GO:0017084(delta1-pyrroline-5-carboxylate synthetase activity)|GO:0042538(hyperosmotic salinity response)|GO:0…
A_84_P19573	0.0383313	-0.749106	-1.30544	-1.20248	0.0158764	-0.212522	-0.684171	-0.334982	-0.0176342	0.46234	0.839323	0.231754	NP221691	AT1G48100.1	NM_103706	glycoside hydrolase family 28 protein / polygalacturonase (pectinase) family protein	GO:0004650(polygalacturonase activity)|GO:0005975(carbohydrate metabolic process)
A_84_P537220	0.510139	-0.713943	-0.83338	-0.196054	0.0920069	2.03484	1.31734	1.19151	-0.0306109	1.59785	1.57098	1.18676	NP231037	AT5G57510.1	NM_125132	hypothetical protein	GO:0003674(molecular_function)|GO:0008150(biological_process)
A_84_P246705	0.297704	0.556194	-1.03509	-0.236337	-0.050729	-0.701442	-1.51851	-0.880902	-0.0270293	-0.560706	0.940491	-0.246478	TC297032	AT3G53980.1	NM_180369	protease inhibitor/seed storage/lipid transfer protein (LTP) family protein	GO:0006869(lipid transport)|GO:0008289(lipid binding)|GO:0012505(endomembrane system)
A_84_P10696	0.153833	-1.23205	-1.15668	-1.33237	-0.0337303	-0.0260583	-0.292187	-0.243522	-0.0286033	0.164315	0.408535	0.133245	TC306445	AT2G24160.1		pseudo
A_84_P805621	-0.32025	-0.00681046	-1.62998	-0.883463	-0.0219799	-0.122436	-0.048422	0.404653	-0.0145942	-0.667519	-0.301488	0.535645	TC304147	AT5G24780.2	NM_001125801	VSP1 (VEGETATIVE STORAGE PROTEIN 1)	GO:0003993(acid phosphatase activity)|GO:0006952(defense response)|GO:0008134(transcription factor binding)|GO:0009753(response to jasmonic acid stimulus)|GO:0012505(endomembrane system)
A_84_P15627	0.017055	-0.621876	-1.28954	-0.798513	0.000305119	-0.450556	-0.868757	-0.584605	0.039548	0.626889	0.671522	0.493572	TC287734	AT3G57020.1	NM_115561	strictosidine synthase family protein	GO:0005783(endoplasmic reticulum)|GO:0009821(alkaloid biosynthetic process)|GO:0016844(strictosidine synthase activity)
A_84_P20289	0.00611764	0.174519	-1.29849	-0.734091	-0.0378545	0.215125	-0.64297	0.603324	0.00506744	0.404444	0.810295	1.00224	TC287627	AT3G28270.1	NM_113746	hypothetical protein	GO:0003674(molecular_function)|GO:0005575(cellular_component)|GO:0008150(biological_process)
A_84_P141439	-0.323497	0.0520553	-1.61999	-0.806071	-0.0244495	-0.224831	-0.286257	0.120166	0.0144169	-0.42216	0.0665895	0.746819	TC312910	AT5G24770.1	NM_122386	VSP2 (VEGETATIVE STORAGE PROTEIN 2); acid phosphatase	GO:0002213(defense response to insect)|GO:0003993(acid phosphatase activity)|GO:0006979(response to oxidative stress)|GO:0009611(response to wounding)|GO:0009625(response to insect)|GO:0009753(response to jasmonic acid stimulus)|GO:0010149(senescence)|GO:0012505(endomembrane system)|GO:0042538(hyperosmotic salinity response)|GO:0046688(response to copper ion)
A_84_P15115	0.0495385	-0.811472	-1.24126	-0.386285	-0.000905626	0.677093	-0.383018	1.17473	0.00903949	0.236859	0.74377	0.33347	TC294658	AT3G24982.1	NM_113404	protein binding	GO:0005515(protein binding)|GO:0007165(signal transduction)|GO:0012505(endomembrane system)
A_84_P808818	-0.360947	-0.0543783	-1.63643	-0.936404	-0.00752568	-0.151903	-0.0174745	0.384048	0.019722	-0.5766	-0.244087	0.592569	TC312910	AT5G24770.2	NM_001036860	VSP2 (VEGETATIVE STORAGE PROTEIN 2); acid phosphatase	GO:0002213(defense response to insect)|GO:0003993(acid phosphatase activity)|GO:0006979(response to oxidative stress)|GO:0009611(response to wounding)|GO:0009625(response to insect)|GO:0009753(response to jasmonic acid stimulus)|GO:0010149(senescence)|GO:0012505(endomembrane system)|GO:0042538(hyperosmotic salinity response)|GO:0046688(response to copper ion)
A_84_P785012	0.0997503	-0.126287	-1.16987	-0.275366	-0.00868824	-0.208099	-0.842089	-0.42399	-0.0430386	0.530726	0.952333	0.741949	TC297913	AT2G47180.1	NM_130286	ATGOLS1 (ARABIDOPSIS THALIANA GALACTINOL SYNTHASE 1); transferase, transferring hexosyl groups	GO:0005575(cellular_component)|GO:0009408(response to heat)|GO:0009644(response to high light intensity)|GO:0016051(carbohydrate biosynthetic process)|GO:0016758(transferase activity, transferring hexosyl groups)|GO:0042542(response to hydrogen peroxide)
A_84_P11975	0.14022	0.227422	-1.12592	0.0841987	-0.0682699	-0.035849	-1.12983	-0.185443	0.0426091	0.737108	1.20557	0.462509	TC296218	AT4G30460.1	NM_119192	glycine-rich protein	GO:0003674(molecular_function)|GO:0008150(biological_process)|GO:0012505(endomembrane system)
A_84_P762197	0.0904774	0.0531232	-1.16674	-0.747498	-0.0205773	-1.02158	-0.899519	-0.247609	-0.00674658	-1.79918	-1.16511	-2.29887	TC301957	AT3G03341.1	NM_001125087	hypothetical protein
A_84_P14954	-0.173267	-0.91162	-1.4292	-1.15211	-0.000590127	-0.0493391	-0.831984	-0.466853	-0.0198264	1.4383	1.87527	1.48686	TC298622	AT1G73600.1	NM_001124125	phosphoethanolamine N-methyltransferase	GO:0000234(phosphoethanolamine N-methyltransferase activity)|GO:0008152(metabolic process)
A_84_P795530	0.0196414	-1.02254	-1.22571	-0.962054	0.0113539	-0.625796	-0.635104	-0.717509	-0.0378582	0.445912	0.0388675	0.668721	TC292921	AT5G22390.1	NM_122144	hypothetical protein
A_84_P18814	0.171486	-1.36446	-1.07162	-1.26171	-0.00697476	-0.885731	-0.85051	-0.492236	0.0323099	0.12496	0.641512	-0.0190426	TC281018	AT5G59670.1	NM_125359	leucine-rich repeat protein kinase, putative	GO:0006468(protein amino acid phosphorylation)|GO:0012505(endomembrane system)|GO:0016301(kinase activity)
A_84_P855873	-0.079761	-1.20228	-1.32084	-1.37475	0.129983	-0.0996003	-0.170519	0.0665559	0.00861748	0.442233	0.790692	0.325812	TC310124	T42092
A_84_P178164	-0.104692	-0.0945862	-1.33696	-1.00778	0.0203475	-0.153863	-1.22677	-0.820305	-0.018445	-0.601189	-0.278604	-0.341175	TC304463	AT1G70850.1	NM_001036188	MLP34 (MLP-LIKE PROTEIN 34)	GO:0003674(molecular_function)|GO:0005575(cellular_component)|GO:0006952(defense response)|GO:0009607(response to biotic stimulus)
A_84_P15036	-0.141001	-1.02173	-1.3698	-1.08115	-0.00228617	0.0815327	-0.462606	0.217486	0.0360709	0.675225	1.0547	0.59753	TC280877	AT5G60900.1	NM_125483	RLK1 (RECEPTOR-LIKE PROTEIN KINASE 1); carbohydrate binding / kinase	GO:0006468(protein amino acid phosphorylation)|GO:0012505(endomembrane system)|GO:0016301(kinase activity)|GO:0030246(carbohydrate binding)
A_84_P21761	-0.317529	-1.49395	-1.54592	-1.52596	-0.000364993	-0.683791	-0.770517	-0.98299	-0.00115253	0.753468	0.822837	0.204694	TC287432	AT1G64500.1	NM_105125	glutaredoxin family protein	GO:0005575(cellular_component)|GO:0006118(electron transport)|GO:0006499(N-terminal protein myristoylation)|GO:0030508(thiol-disulfide exchange intermediate activity)
A_84_P169033	-0.00331421	-1.19004	-1.22763	-0.421788	0.0112708	0.955547	0.959153	0.664603	-0.0338503	1.97417	1.15578	3.1263		AT1G65970.1	NM_105269	TPX2 (THIOREDOXIN-DEPENDENT PEROXIDASE 2); antioxidant	GO:0005575(cellular_component)|GO:0008150(biological_process)|GO:0016209(antioxidant activity)
A_84_P226889	0.0444275	-1.11937	-1.17884	-0.986057	-0.0214959	0.485505	-0.0914249	-0.129405	0.0409897	0.726771	1.01398	0.71128	TC296039	AT4G20000.1	NM_118119	VQ motif-containing protein	GO:0003674(molecular_function)|GO:0005575(cellular_component)|GO:0008150(biological_process)
A_84_P11143	-0.0141228	0.232189	-1.2331	-0.123577	-0.0226592	1.73731	-0.0347317	1.42637	-0.0157516	1.66911	1.65864	2.07114	TC291364	AT5G22570.1	NM_122163	WRKY38 (WRKY DNA-binding protein 38); transcription factor	GO:0003700(transcription factor activity)|GO:0005634(nucleus)|GO:0006355(regulation of transcription, DNA-dependent)
A_84_P550153	-0.107749	-0.442338	-1.3174	-0.456526	-0.0672548	0.257142	-0.0414613	-1.17949	0.0169206	0.633191	-0.494892	0.731868		AT3G30720.1	NM_113975	hypothetical protein	GO:0003674(molecular_function)|GO:0005575(cellular_component)|GO:0008150(biological_process)
A_84_P829045	0.0499965	-0.209836	-1.14942	-0.618133	0.0422984	-0.10483	-0.908931	-0.199625	-0.0101149	-0.115032	0.209866	0.157853	TC312185	AT1G62540.1	NM_104933	flavin-containing monooxygenase family protein / FMO family protein	GO:0004497(monooxygenase activity)|GO:0006118(electron transport)
A_84_P302850	0.121432	0.411336	-1.07656	-0.297864	-0.00338966	-0.192975	-1.30206	-0.220573	-0.0350541	0.0114971	1.23849	-0.577804	TC297604	AT2G37870.1	NM_129343	protease inhibitor/seed storage/lipid transfer protein (LTP) family protein	GO:0006869(lipid transport)|GO:0008289(lipid binding)|GO:0012505(endomembrane system)
A_84_P808192	-0.0599224	0.048782	-1.25317	-0.955652	0.00809365	-0.198969	-1.18612	-0.830578	0.0302368	-0.577613	-0.216027	-0.271467	TC304964	AT1G70850.3	NM_001036188	MLP34 (MLP-LIKE PROTEIN 34)	GO:0003674(molecular_function)|GO:0005575(cellular_component)|GO:0006952(defense response)|GO:0009607(response to biotic stimulus)
A_84_P103716	-0.138355	-0.856468	-1.32598	-0.915789	-0.0332979	-0.167592	-0.834761	0.162301	0.0281487	1.19318	1.2002	1.64864	TC292333	AT5G03350.1	NM_120414	legume lectin family protein	GO:0008150(biological_process)|GO:0012505(endomembrane system)|GO:0030246(carbohydrate binding)
A_84_P20170	0.0515688	-0.751194	-1.13125	-0.957946	0.00291989	-0.642928	-1.22646	-0.95745	-0.0387699	1.219	0.919893	1.12245	TC289724	AT2G01890.1	NM_126250	PAP8 (PURPLE ACID PHOSPHATASE PRECURSOR); acid phosphatase/ protein serine/threonine phosphatase	GO:0003993(acid phosphatase activity)|GO:0004722(protein serine/threonine phosphatase activity)|GO:0012505(endomembrane system)|GO:0016311(dephosphorylation)
A_84_P16077	-0.00799585	0.120023	-1.18966	-0.253472	0.00821661	0.710297	1.22843	1.77087	0.00466581	-0.867561	0.403882	-0.821537	TC287922	AT1G05100.1	NM_100389	MAPKKK18 (Mitogen-activated protein kinase kinase kinase 18); kinase	GO:0006468(protein amino acid phosphorylation)|GO:0016301(kinase activity)
A_84_P831167	0.113316	-1.02275	-1.06696	-0.99398	0.0279632	-0.207567	-0.749097	-0.378748	0.063488	0.679026	0.797834	0.478164	TC294131	AT1G69730.1	NM_105641	protein kinase family protein	GO:0006468(protein amino acid phosphorylation)|GO:0012505(endomembrane system)|GO:0016301(kinase activity)
A_84_P586330	0.35873	0.0195743	-0.82126	-0.460986	-0.0642044	0.285112	0.437109	1.38497	0.0157922	-0.859992	-0.489601	-1.46868	TC281439	AT1G69480.1	NM_105615	EXS family protein / ERD1/XPR1/SYG1 family protein	GO:0003674(molecular_function)|GO:0008150(biological_process)|GO:0016021(integral to membrane)
A_84_P221276	-0.0198227	-1.07667	-1.18325	-1.22276	0.073555	-0.436088	-0.721145	-0.434718	-0.000683347	0.499591	0.366503	0.6885	TC292921	AT5G22390.1	NM_122144	hypothetical protein
A_84_P21596	-0.188934	-1.04876	-1.35069	-1.33544	0.0239378	-0.237508	-1.09715	-0.783592	-0.00675785	0.50493	0.261369	0.337127		AT5G44530.1	NM_123820	subtilase family protein	GO:0004289(subtilase activity)|GO:0006508(proteolysis)|GO:0012505(endomembrane system)
A_84_P23539	-0.211606	-1.33714	-1.37164	-1.17761	0.00186772	-0.206246	-0.519045	-0.437792	-0.0244044	0.680184	0.967283	0.0486906	NP225790	AT5G58770.1	NM_125264	dehydrodolichyl diphosphate synthase, putative / DEDOL-PP synthase, putative	GO:0019408(dolichol biosynthetic process)|GO:0045547(dehydrodolichyl diphosphate synthase activity)
A_84_P16173	-0.0502123	-0.395122	-1.2051	-0.329819	0.00842671	1.52163	0.295179	1.39653	-0.0020558	1.4056	1.68657	2.05085	TC298595	AT1G28480.1	NM_102616	GRX480; thiol-disulfide exchange intermediate	GO:0005575(cellular_component)|GO:0006118(electron transport)|GO:0009751(response to salicylic acid stimulus)|GO:0009863(salicylic acid mediated signaling pathway)|GO:0009867(jasmonic acid mediated signaling pathway)|GO:0030508(thiol-disulfide exchange intermediate activity)
A_84_P786411	0.0408348	-0.592383	-1.10858	-0.502535	0.00528548	-0.14392	-2.06548	-0.530023	-0.0129186	0.0763801	0.444103	0.406284	TC287843	AT4G03060.1	NM_116540	AOP2 (ALKENYL HYDROXALKYL PRODUCING 2); oxidoreductase, acting on paired donors, with incorporation or reduction of molecular oxygen, 2-oxoglutarate as one donor, and incorporation of one atom each of oxygen into both donors	GO:0003674(molecular_function)|GO:0005575(cellular_component)|GO:0008150(biological_process)|GO:0016706(oxidoreductase activity, acting on paired donors, with incorporation or reduction of molecular oxygen, 2-oxoglutarate as one donor, and incorporation of one atom each of oxygen into both donors)|GO:0019761(glucosinolate biosynthetic process)
A_84_P94599	0.0461794	-1.25845	-1.10129	-1.07845	-0.0284574	-0.534169	-0.965543	-0.814677	0.0373041	0.738384	1.06809	0.53146	TC295116	AT3G56290.1	NM_115487	hypothetical protein	GO:0003674(molecular_function)|GO:0008150(biological_process)
A_84_P20655	-0.123279	-0.868516	-1.26739	-0.915771	0.00817092	-0.921981	-1.40493	-2.08768	-0.00325013	0.0338368	-0.796661	-0.333938	TC311156	AT5G45830.1	NM_123951	DOG1 (DELAY OF GERMINATION 1)	GO:0003674(molecular_function)|GO:0005575(cellular_component)|GO:0010162(seed dormancy)
A_84_P810008	-0.0110439	-0.191938	-1.15053	-0.302357	0.0392855	-0.0207609	-1.18123	-0.40126	-0.028304	0.539113	0.603501	0.720023		TA28336_3702
A_84_P762988	0.212927	-0.553582	-0.926462	-0.050685	0.0420904	1.20185	0.142467	1.14033	-0.0149765	0.594205	0.879177	1.06941	TC289689	AT4G36950.1	NM_001085035	MAPKKK21; ATP binding / protein kinase	GO:0004672(protein kinase activity)|GO:0005524(ATP binding)|GO:0006468(protein amino acid phosphorylation)
A_84_P20605	-0.0508836	-0.807239	-1.17799	-0.608466	-0.047739	-0.127325	-0.778473	-0.0170009	0.0274429	0.59641	0.775192	0.711357	TC286904	AT5G24530.1	NM_122361	oxidoreductase, 2OG-Fe(II) oxygenase family protein	GO:0005575(cellular_component)|GO:0009813(flavonoid biosynthetic process)|GO:0016706(oxidoreductase activity, acting on paired donors, with incorporation or reduction of molecular oxygen, 2-oxoglutarate as one donor, and incorporation of one atom each of oxygen into both donors)
A_84_P260340	0.0654243	-0.763257	-1.06068	-0.727999	-0.0176637	-0.597491	-1.4645	-1.10133	0.0192201	0.950253	0.830579	0.484448	TC290373	AT1G76240.1	NM_106274	hypothetical protein	GO:0003674(molecular_function)|GO:0009507(chloroplast)
A_84_P108312	0.096599	-0.836395	-1.0225	-0.725277	0.0449561	-0.0273692	-0.49919	0.0480581	-0.0104253	0.3783	0.485853	0.345972	TC283177	AT2G46440.1	NM_130208	ATCNGC11 (cyclic nucleotide gated channel 11); calmodulin binding / cyclic nucleotide binding / ion channel	GO:0005216(ion channel activity)|GO:0005261(cation channel activity)|GO:0005516(calmodulin binding)|GO:0009620(response to fungus)|GO:0016020(membrane)|GO:0030551(cyclic nucleotide binding)
A_84_P18113	0.252882	0.568725	-0.862	0.897184	0.0274561	1.82181	0.354038	1.88982	0.0181358	0.385944	0.491486	2.29344	TC301077	AT1G76640.1	NM_106314	calmodulin-related protein, putative	GO:0005509(calcium ion binding)|GO:0005575(cellular_component)|GO:0008150(biological_process)
A_84_P13826	-0.00543006	-1.13756	-1.11826	-0.980847	0.00094624	-0.0517792	-1.25436	-0.254417	0.0395201	0.227463	0.828966	0.624894	TC284469	AT4G21760.1	NM_118296	BGLU47 (Beta-glucosidase 47); hydrolase, hydrolyzing O-glycosyl compounds	GO:0004553(hydrolase activity, hydrolyzing O-glycosyl compounds)|GO:0005975(carbohydrate metabolic process)|GO:0012505(endomembrane system)
A_84_P21485	-0.206986	-0.0244399	-1.31922	-0.80517	0.0166412	-0.407061	-0.898127	0.0171149	-0.00854457	0.749319	1.13179	0.812457	TC293091	AT4G37150.1	NM_119878	esterase, putative	GO:0016788(hydrolase activity, acting on ester bonds)
A_84_P13969	0.161617	-0.258192	-0.94667	-0.444381	0.0180942	-0.288511	-0.952152	0.202057	-0.00254557	-0.0658278	0.773521	0.835755	TC295445	AT5G17220.1	NM_121728	ATGSTF12 (GLUTATHIONE S-TRANSFERASE 26); glutathione transferase	GO:0004364(glutathione transferase activity)|GO:0005737(cytoplasm)|GO:0009407(toxin catabolic process)
A_84_P850790	0.0958897	-0.966992	-1.01184	-1.05499	0.0945381	-0.203805	-0.183673	0.0259618	0.00963514	0.411558	0.779815	0.306942	TC305469	BP783345
A_84_P219878	-0.0618199	-0.340416	-1.16199	-0.649035	-0.0147763	-0.42804	-0.671684	-0.647386	-0.0417643	-0.775756	-0.60158	-0.121221	TC304651	AT3G16450.2	NM_180265	jacalin lectin family protein	GO:0003674(molecular_function)|GO:0005575(cellular_component)|GO:0009409(response to cold)
A_84_P581058	-0.297716	-1.19823	-1.39787	-1.62788	0.041933	2.07092	0.532719	0.634059	0.0881861	0.197013	2.63306	0.0133727	TC293535	AT2G27270.1	NM_128285	hypothetical protein	GO:0003674(molecular_function)|GO:0005575(cellular_component)|GO:0008150(biological_process)
A_84_P17546	-0.234296	-0.171884	-1.3329	0.297002	0.0145113	0.281658	-0.822724	0.597378	-0.0056355	0.86821	1.05535	1.73482	TC289360	AT3G44860.1	NM_114355	FAMT (FARNESOIC ACID CARBOXYL-O-METHYLTRANSFERASE); S-adenosylmethionine-dependent methyltransferase/ farnesoic acid O-methyltransferase	GO:0005575(cellular_component)|GO:0008150(biological_process)|GO:0008757(S-adenosylmethionine-dependent methyltransferase activity)|GO:0019010(farnesoic acid O-methyltransferase activity)
A_84_P827393	0.228956	-0.683188	-0.865456	-0.839231	-0.0319196	1.16549	0.257509	0.542759	0.0451067	1.56445	1.92386	0.821323	NP162702	AT3G48650.1		pseudo
A_84_P11287	-0.034146	-0.902613	-1.12785	-0.909359	-0.0253357	-0.334251	-0.931945	-0.720142	-0.0065812	0.631227	0.414685	0.235129	TC297457	AT5G15600.1	NM_121564	SP1L4 (SPIRAL1-LIKE4)	GO:0003674(molecular_function)|GO:0005575(cellular_component)|GO:0008150(biological_process)
A_84_P10711	-0.0137401	0.151871	-1.10632	-0.362887	-0.0639094	0.559588	-0.389208	0.986903	-0.00470477	0.0790352	0.104415	1.42455	TC284354	AT2G39330.1	NM_129490	jacalin lectin family protein	GO:0003674(molecular_function)|GO:0005575(cellular_component)|GO:0008150(biological_process)
A_84_P20509	0.135321	-0.621507	-0.952551	-0.694032	-0.0100444	0.0938266	-0.37605	-0.519334	-0.00448479	0.677532	0.353668	0.393306	TC287680	AT1G48260.1	NM_103723	CIPK17 (SNF1-RELATED PROTEIN KINASE 3.21); kinase	GO:0005575(cellular_component)|GO:0006468(protein amino acid phosphorylation)|GO:0007165(signal transduction)|GO:0016301(kinase activity)
A_84_P567338	-0.0044124	-0.933733	-1.08306	-0.894815	-0.00672456	-0.569329	-0.669272	-0.536008	0.0293444	0.723672	0.913054	0.318895	TC312144	AT5G55570.1	NM_124939	heat shock protein binding / unfolded protein binding	GO:0006457(protein folding)|GO:0009507(chloroplast)|GO:0031072(heat shock protein binding)|GO:0051082(unfolded protein binding)
A_84_P857058	0.261099	0.580572	-0.814973	0.083335	0.0488649	-0.0177775	-1.05238	-0.396075	0.012577	0.262832	0.799908	0.624249	TC310828	TC310828
A_84_P21970	0.0413635	-0.027981	-1.02506	-0.341833	-0.0259907	0.185861	-0.601294	-0.262161	0.0770661	0.699326	0.547295	0.90751	TC292891	AT2G22200.1	NM_127788	AP2 domain-containing transcription factor	GO:0003677(DNA binding)|GO:0003700(transcription factor activity)|GO:0005634(nucleus)|GO:0006355(regulation of transcription, DNA-dependent)
A_84_P760178	0.131591	-0.491802	-0.923305	-0.517093	0.017603	0.36634	-0.6499	0.0920944	-0.0399207	1.40662	1.53158	1.20016	TC309511	AT3G28540.1	NM_001035712	AAA-type ATPase family protein	GO:0005524(ATP binding)|GO:0016887(ATPase activity)
A_84_P12374	0.107929	-0.910263	-0.941801	-1.21101	-0.0129682	0.3228	-0.121408	-0.0157887	0.0185218	0.368101	0.211372	0.320546	TC305326	AT1G15290.1	NM_101398	binding	GO:0005488(binding)|GO:0005575(cellular_component)|GO:0008150(biological_process)
A_84_P23973	-0.186304	-0.887715	-1.22955	-0.942432	-0.0552158	-0.566374	-1.48608	-0.615454	-0.00435901	0.387428	0.752076	0.928526	TC307964	AT3G03780.2	NM_111249	AtMS2 (Arabidopsis thaliana methionine synthase 2); 5-methyltetrahydropteroyltriglutamate-homocysteine S-methyltransferase	GO:0003871(5-methyltetrahydropteroyltriglutamate-homocysteine S-methyltransferase activity)|GO:0005829(cytosol)|GO:0008705(methionine synthase activity)|GO:0009086(methionine biosynthetic process)
A_84_P754645	-0.0985883	-0.978315	-1.1396	-0.946208	0.0067586	-0.196133	-0.276805	-0.294108	0.012378	0.093744	0.387898	-0.0353487		AT1G31540.2	NM_001123924	disease resistance protein (TIR-NBS-LRR class), putative	GO:0000166(nucleotide binding)|GO:0004888(transmembrane receptor activity)|GO:0005515(protein binding)|GO:0005524(ATP binding)|GO:0006952(defense response)|GO:0017111(nucleoside-triphosphatase activity)|GO:0031224(intrinsic to membrane)
A_84_P19357	-0.147596	-0.719553	-1.18754	-0.953706	0.00402467	0.43227	-1.96357	-0.320402	0.0294289	1.3922	2.01567	1.58176	TC287351	AT3G44990.1	NM_114368	XTR8 (xyloglucan:xyloglucosyl transferase 8); hydrolase, acting on glycosyl bonds	GO:0005618(cell wall)|GO:0016762(xyloglucan:xyloglucosyl transferase activity)|GO:0016798(hydrolase activity, acting on glycosyl bonds)|GO:0042546(cell wall biogenesis)|GO:0048046(apoplast)
A_84_P856876	0.295791	0.602572	-0.731073	0.11085	-0.0191718	-0.112955	-1.09109	-0.479992	0.0230962	0.28108	0.739937	0.570347	TC310727	AT1G73330.1	NM_105993	ATDR4 (Arabidopsis thaliana drought-repressed 4)	GO:0009414(response to water deprivation)|GO:0009737(response to abscisic acid stimulus)|GO:0012505(endomembrane system)|GO:0030414(protease inhibitor activity)
A_84_P18929	0.026129	-0.413934	-0.994717	-0.632764	-0.0116075	0.533237	-0.729537	-0.114238	-0.0145198	1.2171	1.2547	0.806067	TC284374	AT1G60590.1	NM_104742	polygalacturonase, putative / pectinase, putative	GO:0004650(polygalacturonase activity)|GO:0005975(carbohydrate metabolic process)
A_84_P515865	0.198974	-0.544471	-0.815554	-0.671148	-0.0833097	0.580653	-0.194476	0.236713	0.0214109	1.22134	1.32402	0.994404	TC309199	AT5G26690.1	NM_180545	heavy-metal-associated domain-containing protein	GO:0005575(cellular_component)|GO:0030001(metal ion transport)|GO:0046872(metal ion binding)
A_84_P13778	-0.153873	-0.633872	-1.1677	-0.584932	-0.00880795	-0.190046	-2.0999	-0.591702	0.000622074	0.0950222	0.451321	0.49623	TC287971	AT4G03060.1	NM_116540	AOP2 (ALKENYL HYDROXALKYL PRODUCING 2); oxidoreductase, acting on paired donors, with incorporation or reduction of molecular oxygen, 2-oxoglutarate as one donor, and incorporation of one atom each of oxygen into both donors	GO:0003674(molecular_function)|GO:0005575(cellular_component)|GO:0008150(biological_process)|GO:0016706(oxidoreductase activity, acting on paired donors, with incorporation or reduction of molecular oxygen, 2-oxoglutarate as one donor, and incorporation of one atom each of oxygen into both donors)|GO:0019761(glucosinolate biosynthetic process)
A_84_P825539	0.145	-0.674462	-0.867912	0.13026	0.0866748	1.34044	0.212009	1.50048	-0.0589276	2.45171	1.4065	1.76195	TC311978	AT1G32350.1	NM_102968	AOX1D (ALTERNATIVE OXIDASE 1D); alternative oxidase	GO:0005739(mitochondrion)|GO:0005740(mitochondrial envelope)|GO:0006118(electron transport)|GO:0009916(alternative oxidase activity)
A_84_P845967	0.00946831	0.24047	-1.00222	-0.0883366	0.0101983	1.73377	-0.0129004	1.43397	0.0395526	1.71282	1.80047	2.09232	TC294674	AT5G22570.1	NM_122163	WRKY38 (WRKY DNA-binding protein 38); transcription factor	GO:0003700(transcription factor activity)|GO:0005634(nucleus)|GO:0006355(regulation of transcription, DNA-dependent)
A_84_P21842	-0.0256418	-0.430306	-1.03618	-0.426872	-0.0048893	-0.000308886	-1.64542	-0.279483	-0.00318838	0.353146	0.65138	0.914626	TC285921	AT1G65860.1	NM_105258	flavin-containing monooxygenase family protein / FMO family protein	GO:0004497(monooxygenase activity)|GO:0005575(cellular_component)|GO:0006118(electron transport)
A_84_P17028	-0.0201756	-0.52142	-1.02853	-0.584533	-0.00318888	-0.00647676	-1.6248	-0.402397	-3.07932e-05	0.420752	0.763419	0.852397	TC285735	AT1G62560.1	NM_104934	flavin-containing monooxygenase family protein / FMO family protein	GO:0004497(monooxygenase activity)|GO:0006118(electron transport)
A_84_P16156	0.151704	-0.241431	-0.854454	-0.571052	-0.0440499	0.370837	-0.685371	-0.150906	0.100273	1.60303	1.14435	1.09912	NP184574	AT1G32780.1	NM_103012	alcohol dehydrogenase, putative	GO:0003824(catalytic activity)|GO:0005488(binding)|GO:0008152(metabolic process)|GO:0008270(zinc ion binding)|GO:0016491(oxidoreductase activity)
A_84_P15194	0.263073	0.664415	-0.73986	0.295941	0.038604	1.18863	-0.123132	1.14067	0.0106173	0.0332189	-0.14707	1.58238	TC299585	AT1G54020.1	NM_179474	myrosinase-associated protein, putative	GO:0004091(carboxylesterase activity)|GO:0006629(lipid metabolic process)|GO:0012505(endomembrane system)
A_84_P832842	0.201669	-0.260195	-0.799415	-0.337541	0.0424957	-0.239726	-1.04511	-1.11232	0.057641	1.72363	1.93835	1.10732	TC293973	AT4G13800.1	NM_117454	permease-related	GO:0008150(biological_process)
A_84_P793001	0.0644315	-0.747512	-0.93577	-0.752538	0.0615796	1.54968	0.541957	0.897872	0.0419248	1.0622	1.39012	0.918804	TC280847	AT1G17420.1	NM_101603	LOX3 (Lipoxygenase 3); iron ion binding / lipoxygenase/ metal ion binding / oxidoreductase, acting on single donors with incorporation of molecular oxygen, incorporation of two atoms of oxygen	GO:0005506(iron ion binding)|GO:0006952(defense response)|GO:0009507(chloroplast)|GO:0009611(response to wounding)|GO:0009695(jasmonic acid biosynthetic process)|GO:0016165(lipoxygenase activity)|GO:0016702(oxidoreductase activity, acting on single donors with incorporation of molecular oxygen, incorporation of two atoms of oxygen)|GO:0040007(growth)|GO:0046872(metal ion binding)
A_84_P14701	0.0245929	-0.863443	-0.962775	-0.893871	-0.0668651	-0.456535	-1.04525	-1.09102	-0.0205578	0.426913	0.750041	0.107265	TC282723	AT3G61880.1	NM_116053	CYP78A9 (CYTOCHROME P450 78A9); oxygen binding	GO:0004497(monooxygenase activity)|GO:0010154(fruit development)|GO:0012505(endomembrane system)|GO:0019825(oxygen binding)
A_84_P54250	-0.0450895	-0.341087	-1.03054	-0.66332	-0.040689	0.0566129	-0.218461	0.0590442	0.0195154	0.931675	1.00276	0.854558	TC312394	AT1G19960.1	NM_101851	hypothetical protein	GO:0003674(molecular_function)|GO:0005575(cellular_component)|GO:0008150(biological_process)
A_84_P581876	0.268963	-0.21622	-0.709168	-0.432054	-0.00899817	0.557069	-0.238214	0.199543	-0.0224552	1.70272	2.09755	1.44504		AT1G76955.1	NM_202430	Expressed protein	GO:0003674(molecular_function)|GO:0008150(biological_process)|GO:0016020(membrane)
A_84_P57310	0.203851	-0.344917	-0.772321	-0.658448	-0.0564557	-0.38463	-1.28513	-0.662449	-0.0167436	0.359189	0.543658	0.716342	NP188132	AT4G28250.1	NM_118965	ATEXPB3 (ARABIDOPSIS THALIANA EXPANSIN B3)	GO:0003674(molecular_function)|GO:0005576(extracellular region)|GO:0006949(syncytium formation)|GO:0009664(plant-type cell wall organization and biogenesis)|GO:0009826(unidimensional cell growth)|GO:0009828(plant-type cell wall loosening)|GO:0012505(endomembrane system)
A_84_P564785	-0.100205	0.255492	-1.07451	-0.251783	-0.0248006	-0.122971	-0.758802	-0.180336	0.0261203	0.516849	0.50918	1.3456	TC282846	AT1G14250.1	NM_101291	nucleoside phosphatase family protein / GDA1/CD39 family protein	GO:0005575(cellular_component)|GO:0008150(biological_process)|GO:0016787(hydrolase activity)
A_84_P753680	0.011353	-0.670348	-0.9584	-0.817672	-0.0783219	0.0705225	-0.301394	0.131397	-0.0368872	0.932322	1.16677	0.87396		AT1G24147.1	NM_001084124	hypothetical protein	GO:0012505(endomembrane system)
A_84_P216038	-0.0318843	-0.948331	-0.999807	-0.991152	-0.00635956	-0.320742	-0.427025	0.00191	-0.0435687	0.363279	0.622113	0.280623	TC314310	AT4G14400.1	NM_117519	ACD6 (ACCELERATED CELL DEATH 6); protein binding	GO:0005515(protein binding)|GO:0008219(cell death)|GO:0009751(response to salicylic acid stimulus)|GO:0009816(defense response to bacterium, incompatible interaction)|GO:0016020(membrane)
A_84_P18673	-0.154406	-0.570735	-1.11908	-0.678716	0.0306191	-0.23572	-1.69014	-0.63708	-0.0119783	0.534441	0.817823	0.850939	TC287304	AT5G07690.1	NM_120851	MYB29 (myb domain protein 29); DNA binding / transcription factor	GO:0003677(DNA binding)|GO:0003700(transcription factor activity)|GO:0006355(regulation of transcription, DNA-dependent)|GO:0009739(response to gibberellin stimulus)|GO:0009751(response to salicylic acid stimulus)|GO:0009753(response to jasmonic acid stimulus)|GO:0010438(cellular response to sulfur starvation)|GO:0010439(regulation of glucosinolate biosynthetic process)|GO:0045449(regulation of t…
A_84_P19516	0.0233727	-0.189353	-0.939265	-0.628705	0.00949729	1.23269	-0.137498	-0.329352	0.0218347	1.62231	1.40197	0.706696	TC295294	AT4G25470.1	NM_118679	CBF2 (FREEZING TOLERANCE QTL 4); DNA binding / transcription activator/ transcription factor	GO:0003677(DNA binding)|GO:0003700(transcription factor activity)|GO:0005634(nucleus)|GO:0006355(regulation of transcription, DNA-dependent)|GO:0009409(response to cold)|GO:0009631(cold acclimation)|GO:0016563(transcription activator activity)
A_84_P23582	0.0119268	-0.833726	-0.948415	-1.01025	-0.0263438	-0.278007	-1.12595	-0.49096	0.00680237	0.0178483	0.345973	-0.518177	TC304672	AT5G15950.1	NM_121600	adenosylmethionine decarboxylase family protein	GO:0004014(adenosylmethionine decarboxylase activity)|GO:0005575(cellular_component)|GO:0006596(polyamine biosynthetic process)|GO:0006597(spermine biosynthetic process)|GO:0008295(spermidine biosynthetic process)
A_84_P284920	-0.166949	-0.932378	-1.12456	-1.0652	0.00594839	-0.668132	-1.49283	-0.905185	-0.00495887	0.67849	0.679993	0.506242	TC284758	AT3G01060.1	NM_110971	hypothetical protein	GO:0003674(molecular_function)|GO:0008150(biological_process)
A_84_P175491	0.312363	-0.571209	-0.643372	-0.19235	0.0229312	0.5566	0.319753	0.836455	0.00421764	-0.586906	0.212608	-0.86426		AT5G62520.1	NM_203252	SRO5 (SIMILAR TO RCD ONE 5); NAD+ ADP-ribosyltransferase	GO:0003950(NAD+ ADP-ribosyltransferase activity)|GO:0005739(mitochondrion)|GO:0006800(oxygen and reactive oxygen species metabolic process)|GO:0009651(response to salt stress)
A_84_P23846	-0.085161	-0.205605	-1.03635	-0.347597	-0.0164705	-0.31443	-0.693705	-0.387527	0.0410964	0.477473	0.884888	0.583136	TC286595	AT2G47180.1	NM_130286	ATGOLS1 (ARABIDOPSIS THALIANA GALACTINOL SYNTHASE 1); transferase, transferring hexosyl groups	GO:0005575(cellular_component)|GO:0009408(response to heat)|GO:0009644(response to high light intensity)|GO:0016051(carbohydrate biosynthetic process)|GO:0016758(transferase activity, transferring hexosyl groups)|GO:0042542(response to hydrogen peroxide)
A_84_P823929	0.0048405	-0.414079	-0.944483	-0.497139	0.00495438	-0.0486309	0.406255	-0.239001	0.00244437	0.731223	0.102784	0.766296	TC300805	AT1G03850.1	NM_179255	glutaredoxin family protein	GO:0006118(electron transport)|GO:0009735(response to cytokinin stimulus)|GO:0030508(thiol-disulfide exchange intermediate activity)
A_84_P12035	0.347147	-0.0494257	-0.600944	-0.391941	-0.00948968	0.473743	-0.592824	0.00505607	0.0118086	1.54466	1.60126	1.13658	TC300677	AT5G02230.1	NM_120301	haloacid dehalogenase-like hydrolase family protein	GO:0005575(cellular_component)|GO:0008152(metabolic process)|GO:0016787(hydrolase activity)
A_84_P20482	0.134331	-0.49408	-0.812483	-0.369496	0.00550387	0.00129907	-0.843384	-0.0670629	-0.0276464	0.428012	0.352479	0.827993	TC283777	AT4G29740.1	NM_179139	CKX4 (CYTOKININ OXIDASE 4); cytokinin dehydrogenase	GO:0008131(amine oxidase activity)|GO:0009823(cytokinin catabolic process)|GO:0012505(endomembrane system)|GO:0019139(cytokinin dehydrogenase activity)
A_84_P848231	-0.00794335	-0.589059	-0.945874	-0.583273	0.0440936	-0.139518	-1.14071	-0.604616	-0.0850198	0.632815	0.616203	0.458069	TC300993	AT1G23740.1	NM_102222	oxidoreductase, zinc-binding dehydrogenase family protein	GO:0008270(zinc ion binding)|GO:0009409(response to cold)|GO:0010319(stromule)
A_84_P16114	-0.222643	-0.274301	-1.15839	-0.896291	-0.0111977	-2.21659	-2.6673	-2.2914	0.0291417	-0.367019	-0.371125	-1.03376	TC286932	AT1G09350.1	NM_100805	ATGOLS3 (ARABIDOPSIS THALIANA GALACTINOL SYNTHASE 3); transferase, transferring glycosyl groups / transferase, transferring hexosyl groups	GO:0005575(cellular_component)|GO:0016051(carbohydrate biosynthetic process)|GO:0016757(transferase activity, transferring glycosyl groups)|GO:0016758(transferase activity, transferring hexosyl groups)
A_84_P825382	0.268735	-0.388717	-0.665885	-0.34954	-0.00599942	-0.0549082	-0.843714	-0.447657	0.0121308	0.988037	1.09005	0.591563	NP042413	AT3G51895.1	NM_115049	SULTR3;1 (SULFATE TRANSPORTER 1); sulfate transmembrane transporter	GO:0008272(sulfate transport)|GO:0015116(sulfate transmembrane transporter activity)|GO:0016020(membrane)|GO:0016021(integral to membrane)
A_84_P297634	0.216417	-0.25675	-0.715937	-0.762557	0.0151549	0.0759794	-0.324788	-0.0317538	0.00211199	-0.240878	0.734561	-0.908523	TC286160	AT5G15500.1	NM_180494	ankyrin repeat family protein	GO:0005515(protein binding)|GO:0008150(biological_process)|GO:0012505(endomembrane system)
A_84_P20353	0.0368544	-0.443806	-0.88562	-0.836129	-0.0288562	-0.16333	-1.05724	-0.73457	0.00653382	0.623412	0.592407	0.377568	TC302484	AT3G56080.1	NM_115466	dehydration-responsive protein-related	GO:0005575(cellular_component)|GO:0008150(biological_process)
A_84_P22736	0.194766	-0.805481	-0.719284	-0.499052	-0.00891512	0.0147456	-0.120614	0.645211	0.0855186	1.03395	1.34884	-0.0327969	TC289189	AT1G09500.1	NM_179294	cinnamyl-alcohol dehydrogenase family / CAD family	GO:0004022(alcohol dehydrogenase activity)|GO:0009809(lignin biosynthetic process)|GO:0012505(endomembrane system)|GO:0045551(cinnamyl-alcohol dehydrogenase activity)
A_84_P57860	-0.226629	-1.20714	-1.13855	-1.19966	0.00124671	-0.157562	-0.761182	-0.377749	0.00275523	0.737016	1.14046	0.383737	TC309241	AT1G65490.1	NM_105223	hypothetical protein	GO:0003674(molecular_function)|GO:0008150(biological_process)|GO:0012505(endomembrane system)
A_84_P19887	-0.0121305	-0.572304	-0.923853	-0.585881	-0.0476067	-0.671694	-1.44786	-0.969445	0.0361259	0.592677	0.770253	0.322787	TC291132	AT1G80760.1	NM_106724	NIP6;1 (NOD26-like intrinsic protein 6;1); water channel	GO:0006810(transport)|GO:0015250(water channel activity)|GO:0016020(membrane)
A_84_P14331	-0.0181312	-0.49136	-0.926547	-0.527525	0.00955736	1.30166	0.800875	0.602059	-0.00576244	0.629524	0.899553	0.435842	TC301640	AT1G76650.1	NM_106315	CML38; calcium ion binding	GO:0005509(calcium ion binding)|GO:0008150(biological_process)
A_84_P849705	0.0140743	-0.359746	-0.894151	-0.456606	-0.0177459	0.0533686	-0.383961	-0.825733	-0.0221296	0.126955	-0.247104	0.480568	TC303677	BX819228		hypothetical protein	GO:0003674(molecular_function)|GO:0005575(cellular_component)|GO:0008150(biological_process)
A_84_P600850	-0.0124375	-0.588826	-0.918927	-0.613774	0.0537817	0.403313	-0.531188	0.185802	0.000206551	1.38879	1.63976	1.28881	TC311038	AT3G28540.1	NM_113774	AAA-type ATPase family protein	GO:0005524(ATP binding)|GO:0016887(ATPase activity)
A_84_P844482	0.0377761	-0.899342	-0.868078	-0.886976	-0.00772817	-0.349613	-0.460892	-0.013609	-0.0730651	0.378051	0.671427	0.262107	TC282141	AT4G14400.1	NM_117519	ACD6 (ACCELERATED CELL DEATH 6); protein binding	GO:0005515(protein binding)|GO:0008219(cell death)|GO:0009751(response to salicylic acid stimulus)|GO:0009816(defense response to bacterium, incompatible interaction)|GO:0016020(membrane)
A_84_P760622	0.00252339	0.694731	-0.902262	-0.551067	-0.0174996	-0.32693	-0.985097	-0.371269	0.0290299	-1.24739	-0.065599	-1.32743	TC295589	AT3G56275.1		pseudo
A_84_P17031	-0.0182094	-0.41909	-0.918938	-0.509363	0.000826249	-0.0881239	0.429508	-0.279123	0.00480265	0.734854	0.104995	0.726183	TC295579	AT1G03850.2	NM_100265	glutaredoxin family protein	GO:0006118(electron transport)|GO:0009735(response to cytokinin stimulus)|GO:0030508(thiol-disulfide exchange intermediate activity)
A_84_P22572	0.132966	-0.355281	-0.765628	-0.361255	-0.00619113	0.464812	0.764432	0.158289	-0.0627958	0.542856	0.459382	0.0310681	TC281364	AT5G52640.1	NM_124642	HSP81-1 (HEAT SHOCK PROTEIN 81-1); ATP binding / unfolded protein binding	GO:0005524(ATP binding)|GO:0009408(response to heat)|GO:0042742(defense response to bacterium)|GO:0046685(response to arsenic)|GO:0051082(unfolded protein binding)
A_84_P10559	0.204578	-0.593207	-0.691412	-0.583399	-0.0151928	0.884446	0.206984	0.636641	-0.0248191	0.738688	1.19631	0.456528	TC302718	AT1G01560.1	NM_001123738	ATMPK11 (Arabidopsis thaliana MAP kinase 11); MAP kinase/ kinase	GO:0004707(MAP kinase activity)|GO:0005575(cellular_component)|GO:0007165(signal transduction)|GO:0009737(response to abscisic acid stimulus)|GO:0016301(kinase activity)
A_84_P11607	0.288577	-0.406728	-0.600609	0.139486	-0.0229387	0.33988	0.00538668	1.40207	0.0515424	0.578725	1.0774	0.375263	TC284137	AT2G45570.1	NM_130119	CYP76C2 (cytochrome P450, family 76, subfamily C, polypeptide 2); oxygen binding	GO:0006118(electron transport)|GO:0019825(oxygen binding)
A_84_P507242	0.0062538	-0.0914346	-0.881649	-0.334945	0.00298886	0.115966	-0.960085	-0.0471312	-0.026188	0.381329	0.583216	0.973994	TC305825	AT1G45201.1	NM_179441	hypothetical protein	GO:0003729(mRNA binding)|GO:0004806(triacylglycerol lipase activity)|GO:0006629(lipid metabolic process)|GO:0012505(endomembrane system)
A_84_P786969	0.0928544	0.279246	-0.790532	0.175009	-0.000292588	0.398016	0.247293	0.932781	0.00300663	-0.551533	-0.0947135	-0.614963		BX813389		ANAC019 (Arabidopsis NAC domain containing protein 19); transcription factor	GO:0003700(transcription factor activity)|GO:0005575(cellular_component)|GO:0007275(multicellular organismal development)|GO:0009414(response to water deprivation)
A_84_P808177	0.15104	-0.269387	-0.732266	-0.358115	-0.111775	-0.399145	-0.901618	-0.103567	-0.00168976	0.0500952	0.540658	-1.52214	TC303396	AT5G59320.1	NM_125323	LTP3 (LIPID TRANSFER PROTEIN 3); lipid binding	GO:0005618(cell wall)|GO:0008289(lipid binding)|GO:0009737(response to abscisic acid stimulus)
A_84_P867949	-0.09012	-1.273	-0.973244	-0.379824	-0.0995822	0.947622	1.05754	0.631677	0.0599418	1.22507	1.35328	0.701556	TC304558	AT4G12735.1	NM_202810	hypothetical protein	GO:0003674(molecular_function)|GO:0008150(biological_process)
A_84_P20210	-0.17059	-0.29825	-1.04513	-0.323476	-0.0319154	-0.383129	-1.8375	-0.575013	0.00133397	0.18344	0.416389	0.706289	TC293280	AT3G03190.1	NM_111189	ATGSTF11 (GLUTATHIONE S-TRANSFERASE F11); glutathione transferase	GO:0004364(glutathione transferase activity)|GO:0005737(cytoplasm)|GO:0006979(response to oxidative stress)|GO:0009407(toxin catabolic process)
A_84_P500750	-0.0269188	-0.389053	-0.900386	-0.433478	-0.0213263	-0.458839	-0.823059	-0.720705	-0.0226808	-0.72689	-0.642142	0.545751		AT5G26270.1	NM_122528	hypothetical protein	GO:0003674(molecular_function)|GO:0005575(cellular_component)|GO:0008150(biological_process)
A_84_P256260	-0.159765	0.396435	-1.03266	-0.632125	-0.0233515	-0.276405	-0.559883	0.102258	0.0206781	-0.65874	-0.112923	-1.00145	TC308530	AT2G41190.1	NM_129684	amino acid transporter family protein	GO:0006865(amino acid transport)|GO:0015171(amino acid transmembrane transporter activity)|GO:0016020(membrane)
A_84_P14108	-0.21132	-0.880758	-1.08261	-1.033	-0.0173206	-0.472828	-1.08126	-0.95062	-0.0236304	0.487187	0.361408	0.293813	TC304804	AT5G64940.1	NM_125893	ATATH13 (ABC2 homolog 13)	GO:0005215(transporter activity)|GO:0006810(transport)|GO:0009507(chloroplast)
A_84_P127071	-0.249587	0.760034	-1.11755	0.36608	0.0704033	0.456747	1.77004	1.91939	0.0268652	-1.66034	0.0808267	-1.525	TC298057	AT5G05220.1	NM_120604	hypothetical protein	GO:0003674(molecular_function)|GO:0008150(biological_process)
A_84_P16475	-0.0262537	-0.08659	-0.88955	-0.328318	0.0387762	-0.258421	-1.50481	-1.16654	0.0165158	0.889793	0.864825	0.606429	TC284976	AT3G26290.1	NM_113536	CYP71B26 (cytochrome P450, family 71, subfamily B, polypeptide 26); oxygen binding	GO:0006118(electron transport)|GO:0012505(endomembrane system)|GO:0019825(oxygen binding)
A_84_P16919	-0.0491478	-0.202764	-0.911517	-0.453442	-0.0203816	-0.0483847	-1.10804	-0.673827	0.0646686	1.19928	1.37419	1.04233	NP230532	AT5G59130.1	NM_125303	subtilase family protein	GO:0004289(subtilase activity)|GO:0006508(proteolysis)|GO:0012505(endomembrane system)
A_84_P17313	-0.0869198	-0.796733	-0.94878	-0.50918	0.00230126	0.110522	-0.120882	0.85286	-0.0241117	-0.976517	-0.174993	-1.11214	TC292307	AT2G37770.1	NM_001036428	aldo/keto reductase family protein	GO:0016491(oxidoreductase activity)
A_84_P752604	0.144536	-0.769638	-0.716548	-0.489089	0.0259451	-0.0641982	-0.163964	0.691858	0.013447	1.01771	1.28554	-0.0865091	TC310085	AT1G09500.2	NM_001035935	cinnamyl-alcohol dehydrogenase family / CAD family	GO:0004022(alcohol dehydrogenase activity)|GO:0009809(lignin biosynthetic process)|GO:0012505(endomembrane system)|GO:0045551(cinnamyl-alcohol dehydrogenase activity)
A_84_P751365	-0.0323448	-0.0487419	-0.889992	-0.276939	0.0223259	0.0962636	-1.01918	-0.0885322	0.00607702	0.40262	0.648461	1.01648	TC285545	AT1G45201.1	NM_202246	hypothetical protein	GO:0003729(mRNA binding)|GO:0004806(triacylglycerol lipase activity)|GO:0006629(lipid metabolic process)|GO:0012505(endomembrane system)
A_84_P23149	0.00384386	-0.400368	-0.849287	-0.212366	0.0070007	1.04167	0.836879	1.7659	0.00185229	-1.25207	-0.434364	-1.39298	TC285267	AT3G46660.1	NM_114533	UDP-glucoronosyl/UDP-glucosyl transferase family protein	GO:0005575(cellular_component)|GO:0008152(metabolic process)|GO:0008194(UDP-glycosyltransferase activity)|GO:0016757(transferase activity, transferring glycosyl groups)
A_84_P271340	0.133863	-0.41225	-0.717036	-0.403609	-0.00245268	-0.243036	0.558593	-0.37324	0.000878256	-0.0708572	-0.148841	-0.291244	TC285310	AT3G09350.1	NM_001084657	armadillo/beta-catenin repeat family protein	GO:0005488(binding)|GO:0005575(cellular_component)|GO:0008150(biological_process)
A_84_P20704	0.15502	-0.159682	-0.695731	-0.140088	-0.0248236	-0.486468	-1.12189	-0.241681	0.0226738	0.0767764	0.67634	-1.45325	TC300021	AT5G59320.1	NM_125323	LTP3 (LIPID TRANSFER PROTEIN 3); lipid binding	GO:0005618(cell wall)|GO:0008289(lipid binding)|GO:0009737(response to abscisic acid stimulus)
A_84_P16271	0.0564463	0.204023	-0.79386	-0.279191	-0.0480402	-0.122191	-0.88532	-0.459432	0.0156573	0.0831073	0.551803	0.340525	TC306038	AT1G73330.1	NM_105993	ATDR4 (Arabidopsis thaliana drought-repressed 4)	GO:0009414(response to water deprivation)|GO:0009737(response to abscisic acid stimulus)|GO:0012505(endomembrane system)|GO:0030414(protease inhibitor activity)
A_84_P868534	-0.2636	-0.918987	-1.10479	-0.972749	-0.0175528	-0.701434	-1.67375	-0.960783	0.0357698	0.792456	0.684873	0.590875	TC312273	AT3G01060.1	NM_110971	hypothetical protein	GO:0003674(molecular_function)|GO:0008150(biological_process)
A_84_P59510	0.000273851	-0.861141	-0.834913	-0.888707	-0.00436498	-0.206412	0.613915	-0.463969	-0.00112829	-0.300934	-0.421249	0.0224737	TC291797	AT4G32480.1	NM_119400	hypothetical protein	GO:0003674(molecular_function)|GO:0005575(cellular_component)|GO:0008150(biological_process)
A_84_P10054	0.0115447	-0.349321	-0.822392	-0.553033	0.008423	-0.202843	-0.90924	-0.41555	0.0195726	0.691006	0.890215	0.463823	NP036808	AT4G23990.1	NM_118531	ATCSLG3 (Cellulose synthase-like G3); transferase/ transferase, transferring glycosyl groups	GO:0000271(polysaccharide biosynthetic process)|GO:0016020(membrane)|GO:0016740(transferase activity)|GO:0016757(transferase activity, transferring glycosyl groups)|GO:0016759(cellulose synthase activity)
A_84_P812936	-0.0642124	0.52199	-0.89775	0.0185981	0.0862715	0.17152	-0.991703	-0.174804	-0.00453899	-0.344906	-0.161394	0.480693		TA29885_3702
A_84_P560513	0.307603	0.632266	-0.518281	-0.156062	-0.00236784	-0.120085	-0.99703	-0.441038	-0.00581469	0.120536	0.712083	-0.338613	TC298972	AT1G70640.1	NM_105732	octicosapeptide/Phox/Bem1p (PB1) domain-containing protein	GO:0003674(molecular_function)|GO:0005575(cellular_component)|GO:0008150(biological_process)
A_84_P834565	-0.104903	-0.691057	-0.929133	-0.751809	-0.0122529	-0.0893545	-0.868657	-0.24926	-0.0384247	0.561668	0.648034	0.27904	TC292923	AT3G08870.1	NM_111721	lectin protein kinase, putative	GO:0006468(protein amino acid phosphorylation)|GO:0006499(N-terminal protein myristoylation)|GO:0012505(endomembrane system)|GO:0016301(kinase activity)
A_84_P22425	-0.0103332	-0.173062	-0.834483	-0.471207	-0.0150385	0.109856	-1.22403	-0.885937	0.0156848	1.39452	1.22348	0.988325	TC294608	AT4G16880.1	NM_117791	disease resistance protein-related	GO:0003674(molecular_function)|GO:0005575(cellular_component)|GO:0008150(biological_process)
A_84_P14878	-0.0230724	-0.855214	-0.841214	-0.8048	-0.00997035	-0.540411	-1.54022	-0.83353	-0.00707336	0.471411	0.948559	0.826754	TC289398	AT5G04950.1	NM_120577	nicotianamine synthase, putative	GO:0030410(nicotianamine synthase activity)
A_84_P14635	0.0440437	0.0145258	-0.773941	-0.144562	0.0314294	-0.0182406	-1.1252	-0.0518077	0.0330257	0.398662	0.497641	0.224012	TC285214	AT1G02460.1	NM_100127	glycoside hydrolase family 28 protein / polygalacturonase (pectinase) family protein	GO:0004650(polygalacturonase activity)|GO:0005975(carbohydrate metabolic process)
A_84_P563250	0.0807901	-0.194695	-0.736384	-0.069054	-0.00907189	1.15471	0.407321	1.20249	0.0299581	1.41364	0.680177	1.57503	TC296822	AT2G26400.1	NM_128197	ARD/ATARD3 (ACIREDUCTONE DIOXYGENASE); acireductone dioxygenase [iron(II)-requiring]/ heteroglycan binding / metal ion binding	GO:0005575(cellular_component)|GO:0008150(biological_process)|GO:0010297(heteroglycan binding)|GO:0010309(acireductone dioxygenase [iron(II)-requiring] activity)|GO:0046872(metal ion binding)
A_84_P20899	0.0687343	-0.0968434	-0.748187	-0.401915	-0.0272638	0.441118	-0.666651	-0.0219155	0.00109405	0.858648	0.8225	0.516113	TC306558	AT1G10640.1	NM_100940	polygalacturonase, putative / pectinase, putative	GO:0004650(polygalacturonase activity)|GO:0005575(cellular_component)|GO:0005975(carbohydrate metabolic process)
A_84_P20155	0.00238096	-0.858121	-0.811432	-0.7328	0.00484271	-0.3107	-0.806301	-0.499984	0.00832328	0.513054	0.433432	0.287095	TC290958	AT2G46450.1	NM_180123	ATCNGC12 (cyclic nucleotide gated channel 12); cyclic nucleotide binding / ion channel	GO:0005216(ion channel activity)|GO:0005261(cation channel activity)|GO:0009620(response to fungus)|GO:0016020(membrane)|GO:0030551(cyclic nucleotide binding)
A_84_P556002	-0.0510319	-0.463382	-0.864033	-0.609735	0.00965529	-0.0748197	-0.663459	-0.154917	-0.0108323	0.271463	0.488177	0.533184	TC310129	AT1G45191.2	NM_202245	glycosyl hydrolase family 1 protein	GO:0003824(catalytic activity)|GO:0004553(hydrolase activity, hydrolyzing O-glycosyl compounds)|GO:0005975(carbohydrate metabolic process)|GO:0012505(endomembrane system)|GO:0043169(cation binding)
A_84_P245475	0.231916	-0.549529	-0.580478	-0.232361	-0.00896934	1.07044	0.605531	1.09526	-0.0024916	-0.123247	0.558559	-0.0804325	TC287210	AT2G25460.1	NM_128103	hypothetical protein	GO:0003674(molecular_function)|GO:0005575(cellular_component)|GO:0008150(biological_process)
A_84_P19248	-0.0541896	-0.688353	-0.864317	-0.750484	0.00159972	-0.384172	-1.21358	-0.782135	0.0011285	0.830508	0.685498	0.709627	NP332299	AT3G01550.1	NM_111021	triose phosphate/phosphate translocator, putative	GO:0009507(chloroplast)|GO:0009670(triose-phosphate transmembrane transporter activity)|GO:0015297(antiporter activity)|GO:0015717(triose phosphate transport)|GO:0016020(membrane)|GO:0016021(integral to membrane)
A_84_P548594	0.0745311	-0.51095	-0.734556	-0.688694	-0.041748	-0.305519	-1.72619	-1.16156	-0.0204932	0.36109	0.667391	-0.0470345		AT5G05840.1	NM_120666	hypothetical protein	GO:0003674(molecular_function)|GO:0005575(cellular_component)|GO:0008150(biological_process)
A_84_P785047	0.147061	-0.472003	-0.654512	-0.370522	-0.00420384	0.508111	0.304991	0.646202	0.0260082	0.470363	0.838429	0.0702605	TC284810	AT2G36780.1	NM_129233	UDP-glucoronosyl/UDP-glucosyl transferase family protein	GO:0005575(cellular_component)|GO:0008152(metabolic process)|GO:0008194(UDP-glycosyltransferase activity)|GO:0016757(transferase activity, transferring glycosyl groups)
A_84_P149978	0.0265325	-0.347007	-0.77369	-0.353568	0.0372684	0.645069	-0.668406	0.938844	0.0377117	1.42236	2.02145	2.2932	TC302619	AT4G01080.1	NM_116338	hypothetical protein	GO:0005575(cellular_component)|GO:0008150(biological_process)
A_84_P827553	-0.0711257	-0.366753	-0.869673	-0.576235	0.0546614	0.0026805	-0.755204	-0.476426	0.00911557	0.457437	0.393945	0.487156	TC298377	AT2G39250.1	NM_179982	SNZ (SCHNARCHZAPFEN); DNA binding / transcription factor	GO:0003677(DNA binding)|GO:0003700(transcription factor activity)|GO:0005634(nucleus)|GO:0005730(nucleolus)|GO:0006355(regulation of transcription, DNA-dependent)|GO:0007275(multicellular organismal development)
A_84_P846050	0.02247	-0.248758	-0.775746	-0.213416	-0.0132308	-0.266044	-1.45272	-0.499472	-0.0367926	0.025876	0.322863	0.604568	TC295025	AT4G12030.1	NM_117273	bile acid:sodium symporter family protein	GO:0005215(transporter activity)|GO:0006814(sodium ion transport)|GO:0008508(bile acid:sodium symporter activity)|GO:0016020(membrane)
A_84_P818622	-0.0258758	-0.128533	-0.823626	0.0201213	0.0520639	0.00445768	-0.520967	0.168918	-0.00753145	1.25319	1.29347	1.33378	TC292948	AT3G22600.1	NM_113159	protease inhibitor/seed storage/lipid transfer protein (LTP) family protein	GO:0006869(lipid transport)|GO:0008289(lipid binding)|GO:0031225(anchored to membrane)
A_84_P818265	0.0157802	-0.854606	-0.781658	-0.781575	0.00375874	-0.469184	0.563325	-0.666082	0.0313757	-0.473967	-0.612363	-0.129871	TC291797	AT4G32480.1	NM_119400	hypothetical protein	GO:0003674(molecular_function)|GO:0005575(cellular_component)|GO:0008150(biological_process)
A_84_P90469	-0.101593	-0.385319	-0.880137	-0.43082	-0.0121114	-0.287036	-1.52007	-0.396466	0.0256766	0.171853	0.580208	0.939324	TC283809	AT1G16410.1	NM_101507	CYP79F1 (SUPERSHOOT 1)	GO:0005783(endoplasmic reticulum)|GO:0016709(oxidoreductase activity, acting on paired donors, with incorporation or reduction of molecular oxygen, NADH or NADPH as one donor, and incorporation of one atom of oxygen)|GO:0019761(glucosinolate biosynthetic process)
A_84_P822179	-0.0570528	-0.229431	-0.835488	-0.733589	0.00489178	-0.248786	0.280203	-0.226349	-0.0401252	-0.881581	-0.889004	-1.37346	TC296111	AT5G02020.1	NM_120280	hypothetical protein	GO:0003674(molecular_function)|GO:0008150(biological_process)|GO:0009507(chloroplast)
A_84_P18473	0.112021	-0.528993	-0.666266	-0.654067	0.00340122	0.293179	-0.609407	0.0527495	0.00142839	0.569016	0.779958	0.35946	TC293792	AT3G59140.1	NM_115776	ATMRP14 (Arabidopsis thaliana multidrug resistance-associated protein 14)	GO:0006810(transport)|GO:0016021(integral to membrane)|GO:0042626(ATPase activity, coupled to transmembrane movement of substances)
A_84_P595141	0.152935	-0.0747532	-0.622769	0.242173	0.143034	1.16585	0.672235	1.13649	-0.0897149	0.899356	1.02645	1.14347	TC297853	AT1G30135.1	NM_102753	JAZ8/TIFY5A (JASMONATE-ZIM-DOMAIN PROTEIN 8)	GO:0003674(molecular_function)|GO:0005575(cellular_component)|GO:0008150(biological_process)
A_84_P237883	-0.13732	-0.411383	-0.911985	-0.486901	-0.0295971	-0.526876	-1.22865	-0.517135	0.0147536	-0.159863	0.112796	0.56254	TC287037	AT5G14200.1	NM_001036803	3-isopropylmalate dehydrogenase, chloroplast, putative	GO:0003862(3-isopropylmalate dehydrogenase activity)|GO:0008152(metabolic process)|GO:0009098(leucine biosynthetic process)|GO:0009536(plastid)
A_84_P196584	0.0340897	-0.641591	-0.739586	-0.764484	-0.0148807	1.10919	0.207533	0.541513	0.0672191	1.55511	1.94189	0.83382	NP162702	AT3G48650.1		pseudo
A_84_P22256	0.00159408	-0.358364	-0.763059	-0.310163	0.00401014	-0.293562	-1.67338	-0.424833	-0.0128201	0.117266	0.447582	0.765554	TC300460	AT3G58990.1	NM_115761	aconitase C-terminal domain-containing protein	GO:0008152(metabolic process)|GO:0009316(3-isopropylmalate dehydratase complex)|GO:0009507(chloroplast)|GO:0016836(hydro-lyase activity)
A_84_P13943	-0.11987	-0.507698	-0.869994	-0.492811	-0.0375306	-0.141294	-0.990257	-0.335783	-0.027823	0.158032	0.448106	0.656372	TC304146	AT5G07460.1	NM_120828	PMSR2 (PEPTIDEMETHIONINE SULFOXIDE REDUCTASE 2); peptide-methionine-(S)-S-oxide reductase	GO:0005575(cellular_component)|GO:0006464(protein modification process)|GO:0008113(peptide-methionine-(S)-S-oxide reductase activity)
A_84_P16630	-0.0478956	-0.256708	-0.783937	-0.30058	-0.0217649	-0.216383	-0.555287	-0.391674	-0.0129032	0.584336	0.785019	0.495008	TC290525	AT4G09750.1	NM_117043	short-chain dehydrogenase/reductase (SDR) family protein	GO:0008152(metabolic process)|GO:0016491(oxidoreductase activity)
A_84_P785475	-0.0610774	-0.302674	-0.795663	-0.0756555	-0.00867227	0.385768	-0.672612	0.475695	-0.0167558	-0.171615	0.491649	0.419532	TC280847	AT1G17420.1	NM_101603	LOX3 (Lipoxygenase 3); iron ion binding / lipoxygenase/ metal ion binding / oxidoreductase, acting on single donors with incorporation of molecular oxygen, incorporation of two atoms of oxygen	GO:0005506(iron ion binding)|GO:0006952(defense response)|GO:0009507(chloroplast)|GO:0009611(response to wounding)|GO:0009695(jasmonic acid biosynthetic process)|GO:0016165(lipoxygenase activity)|GO:0016702(oxidoreductase activity, acting on single donors with incorporation of molecular oxygen, incorporation of two atoms of oxygen)|GO:0040007(growth)|GO:0046872(metal ion binding)
A_84_P821119	0.101069	-0.450971	-0.630128	-0.35031	0.00274867	-0.281462	0.546811	-0.420522	-0.0284823	-0.165958	-0.215182	-0.311813	NP502554	AT3G09350.2	NM_001084657	armadillo/beta-catenin repeat family protein	GO:0005488(binding)|GO:0005575(cellular_component)|GO:0008150(biological_process)
A_84_P764315	0.0177323	0.41344	-0.709895	-0.409149	-0.00120012	-0.12511	-0.933429	-0.49582	0.0414174	-1.0701	-0.837337	-0.0561051	TC300955	AT4G13235.1	NM_117394	EDA21 (embryo sac development arrest 21)	GO:0003674(molecular_function)|GO:0009553(embryo sac development)|GO:0012505(endomembrane system)
A_84_P15874	-0.183047	-0.516294	-0.910639	-0.511422	0.00871826	0.225339	-0.548268	-0.250649	-0.0519109	1.3266	1.4483	0.955383	TC294763	AT5G24150.1	NM_122320	SQP1 (Squalene monooxygenase 1)	GO:0004506(squalene monooxygenase activity)|GO:0012505(endomembrane system)|GO:0016126(sterol biosynthetic process)
A_84_P20799	0.171423	-0.374285	-0.555556	-0.398956	0.00779123	0.400257	-0.214522	0.142106	-0.0489969	-0.0868802	0.334323	-0.461568	TC308104	AT1G02390.1	NM_100120	ATGPAT2/GPAT2 (GLYCEROL-3-PHOSPHATE ACYLTRANSFERASE 2); acyltransferase	GO:0008152(metabolic process)|GO:0008415(acyltransferase activity)
A_84_P814616	-0.0727754	0.126518	-0.799549	-0.0717942	0.00544001	-0.248792	-0.995455	-0.0120666	-0.00319698	-1.20564	-1.02481	0.114721	TC308670	AT4G37410.1	NM_119904	CYP81F4 (cytochrome P450, family 81, subfamily F, polypeptide 4); oxygen binding	GO:0005783(endoplasmic reticulum)|GO:0006118(electron transport)|GO:0019825(oxygen binding)
A_84_P13407	0.016978	-0.326791	-0.709592	-0.357378	-0.00513936	0.0927092	-0.970048	-0.224785	0.00803243	0.508979	0.922928	0.993994	TC289387	AT1G18590.1	NM_101717	sulfotransferase family protein	GO:0005575(cellular_component)|GO:0008146(sulfotransferase activity)|GO:0008150(biological_process)
A_84_P816695	-0.0276958	-0.497063	-0.752345	-0.58247	-0.0212533	0.295476	-0.511054	-0.281808	-0.0745763	0.856774	1.086	0.516029	TC299794	AT2G37970.1	NM_129353	SOUL-1; binding	GO:0005488(binding)|GO:0005575(cellular_component)|GO:0006499(N-terminal protein myristoylation)|GO:0010017(red or far red light signaling pathway)
A_84_P14255	-0.0126629	-0.433556	-0.735936	-0.54275	-0.0349498	-0.113614	-0.427663	-0.444668	0.0393407	0.87378	0.957623	0.693861	TC286941	AT1G64970.1	NM_105171	G-TMT (GAMMA-TOCOPHEROL METHYLTRANSFERASE)	GO:0009507(chloroplast)|GO:0010189(vitamin E biosynthetic process)|GO:0050342(tocopherol O-methyltransferase activity)
A_84_P18843	-0.124514	0.19425	-0.844707	0.047908	-0.0378817	-0.0305415	-0.0871727	0.144721	-0.0168145	-0.0186719	0.549777	-0.450846	TC313701	AT5G66400.1	NM_126038	RAB18 (RESPONSIVE TO ABA 18)	GO:0003674(molecular_function)|GO:0005575(cellular_component)|GO:0006950(response to stress)|GO:0009414(response to water deprivation)|GO:0009631(cold acclimation)|GO:0009737(response to abscisic acid stimulus)|GO:0009961(response to 1-aminocyclopropane-1-carboxylic acid)
A_84_P224809	0.0135507	-0.395376	-0.689145	-0.259687	0.0378521	0.357418	-0.296526	-0.200205	0.0326702	0.607918	0.881254	0.399286	TC295409	AT2G38790.1	NM_129436	hypothetical protein	GO:0003674(molecular_function)|GO:0005575(cellular_component)|GO:0008150(biological_process)
A_84_P15370	0.00516187	-0.837959	-0.697245	-0.759099	0.00221416	0.0752263	-0.205525	0.406183	-0.014841	0.493317	0.823042	1.08401	TC286577	AT1G04980.1	NM_100376	ATPDIL2-2 (PDI-LIKE 2-2); thiol-disulfide exchange intermediate	GO:0009505(plant-type cell wall)|GO:0030508(thiol-disulfide exchange intermediate activity)|GO:0045454(cell redox homeostasis)
A_84_P11568	0.0357653	-0.19001	-0.666046	-0.235028	0.0038288	-0.0154915	-0.898892	-0.111664	0.0532746	0.929038	0.923189	0.979595	TC282061	AT2G40460.1	NM_129607	proton-dependent oligopeptide transport (POT) family protein	GO:0005215(transporter activity)|GO:0006857(oligopeptide transport)|GO:0009624(response to nematode)|GO:0016020(membrane)
A_84_P11530	-0.136138	-0.492376	-0.837123	-0.577812	0.0156691	-0.623362	-1.27886	-0.459345	0.0144051	-0.331781	0.0347944	0.543924	TC291446	AT1G78370.1	NM_106484	ATGSTU20 (Arabidopsis thaliana Glutathione S-transferase (class tau) 20); glutathione transferase	GO:0004364(glutathione transferase activity)|GO:0005737(cytoplasm)|GO:0009407(toxin catabolic process)
A_84_P755231	0.212602	-0.479142	-0.487107	-0.540863	0.0640041	1.94841	0.362728	0.831096	0.0226305	1.04065	1.64301	0.640232	NP965742	AT2G14270.1		pseudo
A_84_P859998	0.0867259	0.0594872	-0.610524	0.0431586	0.0326192	0.312624	-1.05807	-0.0553688	-0.0461731	0.621315	0.911665	1.12645	TC312512	AT3G54600.1	NM_115317	DJ-1 family protein	GO:0012505(endomembrane system)

## Sheet: WoA>Rp-3h
WoA>Rp-3h
Type	without aphid	M. cerasi	M. persicae	R. padi	without aphid	M. cerasi	M. persicae	R. padi	without aphid	M. cerasi	M. persicae	R. padi
Time	3h				6h				24h
Systematic	log2												TIGRID	At accession	GenbankAccession	Gene function	GO
A_84_P720334	0.723779	-0.888609	-1.669	-1.8158	0.041933	2.9504	0.778746	0.547052	0.0344561	2.54241	3.11266	0.624213		TA29990_3702
A_84_P18640	0.679823	-1.00839	-1.88603	-1.6659	-0.164253	2.46738	-0.303202	2.43903	-0.0381801	1.29606	1.61885	3.22519	TC282751	AT4G16590.1	NM_117760	ATCSLA01 (Cellulose synthase-like A1); glucosyltransferase/ transferase, transferring glycosyl groups	GO:0005575(cellular_component)|GO:0008150(biological_process)|GO:0016757(transferase activity, transferring glycosyl groups)|GO:0016759(cellulose synthase activity)|GO:0046527(glucosyltransferase activity)
A_84_P305070	0.11401	-2.75641	-2.99878	-2.22718	0.0351296	-1.23396	-2.71394	-2.08326	0.0190402	2.38675	2.63684	1.32617	TC284320	AT2G15020.1	NM_127064	hypothetical protein	GO:0003674(molecular_function)|GO:0005575(cellular_component)|GO:0008150(biological_process)
A_84_P836671	0.14495	-1.85467	-2.91599	-2.12048	0.0118517	-0.67648	-1.66892	-1.85388	0.00197645	1.69531	1.37426	1.50242	TC300702	TA52555_3702
A_84_P845388	0.0918041	-2.18551	-2.22352	-2.16698	0.041933	0.618095	0.566162	0.296141	0.0857754	-0.113305	0.233436	-0.296946	TC290515	TC290515			GO:0008152(metabolic process)|GO:0016491(oxidoreductase activity)
A_84_P739644	0.251293	-2.09481	-2.59845	-1.89072	-0.0422895	-0.978726	-1.87021	-1.3291	0.00741472	1.33894	1.55866	1.17321		AT1G70260.1	NM_105694	nodulin MtN21 family protein	GO:0003674(molecular_function)|GO:0016020(membrane)
A_84_P22334	0.114804	-1.41415	-2.11871	-1.92505	0.000336565	-0.728642	-0.116133	-1.45583	-0.00764012	0.411661	-0.0139118	-0.148959	TC284168	AT4G20820.1	NM_118200	FAD-binding domain-containing protein	GO:0006118(electron transport)|GO:0009055(electron carrier activity)
A_84_P595614	0.318823	-1.53262	-1.63489	-1.70391	-0.069733	0.785095	0.0280314	0.56861	0.00844701	1.49494	1.89553	1.36589	TC282027	AT4G14390.1	NM_117518	ankyrin repeat family protein	GO:0003674(molecular_function)|GO:0005575(cellular_component)|GO:0008150(biological_process)
A_84_P11914	0.187929	-1.88766	-1.90934	-1.80339	-0.0201813	-1.289	0.492591	-1.48912	0.0317133	-0.785089	-0.892602	-0.918503	TC297656	AT4G12400.1	NM_117310	stress-inducible protein, putative	GO:0005488(binding)|GO:0005575(cellular_component)|GO:0006950(response to stress)|GO:0009408(response to heat)|GO:0009644(response to high light intensity)|GO:0042542(response to hydrogen peroxide)
A_84_P19241	-0.237307	-2.7187	-2.7895	-2.17185	0.0290967	-1.58037	-1.96908	-1.78337	-0.0142357	0.0533761	0.12892	-0.364137	TC284054	AT2G46830.1	NM_180129	CCA1 (CIRCADIAN CLOCK ASSOCIATED 1); transcription factor	GO:0003677(DNA binding)|GO:0003700(transcription factor activity)|GO:0007623(circadian rhythm)|GO:0009651(response to salt stress)|GO:0009723(response to ethylene stimulus)|GO:0009733(response to auxin stimulus)|GO:0009737(response to abscisic acid stimulus)|GO:0009739(response to gibberellin stimulus)|GO:0009751(response to salicylic acid stimulus)|GO:0009753(response to jasmonic acid stimulus)|…
A_84_P16903	0.1394	-1.47832	-2.2541	-1.66535	-0.0424249	0.0101989	-1.14518	-0.154048	-0.0205537	1.404	1.53838	1.16729	TC295859	AT5G54610.1	NM_124842	ANK (ANKYRIN); protein binding	GO:0005515(protein binding)|GO:0005575(cellular_component)|GO:0009751(response to salicylic acid stimulus)
A_84_P751150	0.518198	-1.11539	-1.68838	-1.26598	0.0316473	0.660124	0.276084	0.790711	0.0231487	1.19608	0.993629	1.30026	NP041492	AT1G02230.1	NM_100104	ANAC004 (Arabidopsis NAC domain containing protein 4); transcription factor	GO:0003700(transcription factor activity)|GO:0005575(cellular_component)|GO:0007275(multicellular organismal development)
A_84_P93089	-0.535617	-1.91989	-3.08694	-2.3149	-0.00533262	-1.14504	-2.10308	-1.56106	0.00959158	1.68369	1.41505	1.49537	TC292156	AT1G13650.1	NM_179324	hypothetical protein	GO:0003674(molecular_function)|GO:0005575(cellular_component)|GO:0008150(biological_process)
A_84_P513574	0.0140557	-1.48627	-2.17041	-1.7223	-0.00708549	-0.0434734	0.0914289	0.159305	0.0294272	0.819665	1.02401	0.826605	TC304936	AT2G14560.2	NM_201727	hypothetical protein	GO:0003674(molecular_function)|GO:0005575(cellular_component)|GO:0008150(biological_process)|GO:0009751(response to salicylic acid stimulus)|GO:0050832(defense response to fungus)
A_84_P13983	-0.0492096	-1.7026	-2.05362	-1.68165	-0.0452472	-0.909871	-1.41345	-1.49735	0.0593804	0.728037	0.607277	0.0289323	TC291213	AT5G24120.1	NM_122317	SIGE (RNA polymerase sigma subunit E); DNA binding / DNA-directed RNA polymerase/ sigma factor/ transcription factor	GO:0003677(DNA binding)|GO:0003700(transcription factor activity)|GO:0003899(DNA-directed RNA polymerase activity)|GO:0006352(transcription initiation)|GO:0006355(regulation of transcription, DNA-dependent)|GO:0010114(response to red light)|GO:0010218(response to far red light)|GO:0016987(sigma factor activity)
A_84_P19231	0.26897	-1.45722	-1.99364	-1.32525	0.014891	-1.02319	0.595363	-1.63351	-0.0413012	-0.783157	-0.611762	-1.52604	TC289736	AT2G26150.1	NM_001124916	ATHSFA2 (Arabidopsis thaliana heat shock transcription factor A2)	GO:0003677(DNA binding)|GO:0003700(transcription factor activity)|GO:0005634(nucleus)|GO:0009408(response to heat)|GO:0009644(response to high light intensity)|GO:0012505(endomembrane system)|GO:0042542(response to hydrogen peroxide)
A_84_P18192	0.360834	-0.714216	-1.68713	-1.22245	-0.0217132	-0.213238	-1.80468	-0.756499	0.00147797	0.926656	0.635786	0.8246	TC311043	AT2G20750.1	NM_127640	ATEXPB1 (ARABIDOPSIS THALIANA EXPANSIN B1)	GO:0003674(molecular_function)|GO:0005576(extracellular region)|GO:0009664(plant-type cell wall organization and biogenesis)|GO:0009826(unidimensional cell growth)|GO:0009828(plant-type cell wall loosening)|GO:0012505(endomembrane system)
A_84_P20292	-0.320637	-2.05529	-1.88551	-1.90294	-0.0297273	-1.2829	-1.42994	-1.50009	0.00956328	0.292043	0.180949	-0.203656	TC293154	AT3G02380.1	NM_111105	COL2 (CONSTANS-LIKE 2); transcription factor/ zinc ion binding	GO:0003700(transcription factor activity)|GO:0005622(intracellular)|GO:0008270(zinc ion binding)|GO:0009909(regulation of flower development)
A_84_P235073	-0.306987	-1.57466	-2.23314	-1.81548	-0.0623371	-1.1336	-1.99309	-2.11034	-0.018332	0.588308	0.38209	0.0591216	TC288208	AT1G73870.1	NM_106047	zinc finger (B-box type) family protein	GO:0003700(transcription factor activity)|GO:0005622(intracellular)|GO:0008270(zinc ion binding)|GO:0045449(regulation of transcription)
A_84_P10696	0.153833	-1.23205	-1.15668	-1.33237	-0.0337303	-0.0260583	-0.292187	-0.243522	-0.0286033	0.164315	0.408535	0.133245	TC306445	AT2G24160.1		pseudo
A_84_P18814	0.171486	-1.36446	-1.07162	-1.26171	-0.00697476	-0.885731	-0.85051	-0.492236	0.0323099	0.12496	0.641512	-0.0190426	TC281018	AT5G59670.1	NM_125359	leucine-rich repeat protein kinase, putative	GO:0006468(protein amino acid phosphorylation)|GO:0012505(endomembrane system)|GO:0016301(kinase activity)
A_84_P17828	0.186887	-1.29297	-1.41624	-1.23292	-0.0245516	-0.874558	0.388614	-1.36444	0.0308015	-0.302267	-0.203721	-0.578177	TC304278	AT5G48570.1	NM_124233	peptidyl-prolyl cis-trans isomerase, putative / FK506-binding protein, putative	GO:0003755(peptidyl-prolyl cis-trans isomerase activity)|GO:0005516(calmodulin binding)|GO:0005528(FK506 binding)|GO:0005575(cellular_component)|GO:0006457(protein folding)
A_84_P23021	0.243154	-0.644856	-1.40697	-1.17076	0.129721	0.159927	-0.920608	-0.206078	0.0159726	0.827091	1.17071	0.524057	TC312054	AT2G29090.1	NM_128466	CYP707A2 (cytochrome P450, family 707, subfamily A, polypeptide 2); oxygen binding	GO:0009639(response to red or far red light)|GO:0009687(abscisic acid metabolic process)|GO:0010114(response to red light)|GO:0010295((+)-abscisic acid 8'-hydroxylase activity)|GO:0012505(endomembrane system)|GO:0019825(oxygen binding)|GO:0048838(release of seed from dormancy)
A_84_P17207	0.410168	-0.618081	-1.21693	-0.967265	0.000895666	0.290447	-0.621342	-0.0936418	0.00958159	1.58891	2.10258	1.36588	TC287417	AT1G57590.1	NM_104556	carboxylesterase	GO:0004091(carboxylesterase activity)|GO:0008150(biological_process)
A_84_P581058	-0.297716	-1.19823	-1.39787	-1.62788	0.041933	2.07092	0.532719	0.634059	0.0881861	0.197013	2.63306	0.0133727	TC293535	AT2G27270.1	NM_128285	hypothetical protein	GO:0003674(molecular_function)|GO:0005575(cellular_component)|GO:0008150(biological_process)
A_84_P186924	0.0995843	-1.09341	-1.48102	-1.2276	0.00408514	0.120221	-0.42021	0.00215333	-0.00241363	0.579908	0.920704	0.339717	TC281125	AT1G65790.1	NM_105252	ARK1 (A. THALIANA RECEPTOR KINASE I); kinase	GO:0004674(protein serine/threonine kinase activity)|GO:0006468(protein amino acid phosphorylation)|GO:0009875(pollen-pistil interaction)|GO:0016020(membrane)|GO:0016301(kinase activity)|GO:0019199(transmembrane receptor protein kinase activity)
A_84_P12374	0.107929	-0.910263	-0.941801	-1.21101	-0.0129682	0.3228	-0.121408	-0.0157887	0.0185218	0.368101	0.211372	0.320546	TC305326	AT1G15290.1	NM_101398	binding	GO:0005488(binding)|GO:0005575(cellular_component)|GO:0008150(biological_process)
A_84_P21186	0.033853	-0.910912	-1.86163	-1.26566	0.0168237	-0.330275	-0.973061	-0.469023	-0.00969861	1.19877	1.05831	0.898566	TC282193	AT3G21670.1	NM_113062	nitrate transporter (NTP3)	GO:0005215(transporter activity)|GO:0006857(oligopeptide transport)|GO:0016020(membrane)
A_84_P14948	0.122247	-1.05604	-0.00769636	-1.17315	0.0077688	0.445144	0.828604	0.535501	-0.0265742	-2.17754	-1.31789	-2.04402	TC291934	AT5G37260.1	NM_123085	CIR1/RVE2 (CIRCADIAN 1); DNA binding / transcription factor	GO:0003677(DNA binding)|GO:0003700(transcription factor activity)|GO:0007623(circadian rhythm)|GO:0009651(response to salt stress)|GO:0009723(response to ethylene stimulus)|GO:0009733(response to auxin stimulus)|GO:0009737(response to abscisic acid stimulus)|GO:0009739(response to gibberellin stimulus)|GO:0009751(response to salicylic acid stimulus)|GO:0009753(response to jasmonic acid stimulus)|…
A_84_P855873	-0.079761	-1.20228	-1.32084	-1.37475	0.129983	-0.0996003	-0.170519	0.0665559	0.00861748	0.442233	0.790692	0.325812	TC310124	T42092
A_84_P12560	-0.0981687	-1.23367	-1.65622	-1.38297	-0.0514237	-1.06929	-1.59334	-1.53197	0.022401	0.466588	0.32164	0.0138812	TC293522	AT2G31380.1	NM_128695	STH (salt tolerance homologue); transcription factor/ zinc ion binding	GO:0003700(transcription factor activity)|GO:0005622(intracellular)|GO:0008270(zinc ion binding)|GO:0012505(endomembrane system)|GO:0019904(protein domain specific binding)|GO:0045449(regulation of transcription)
A_84_P20976	0.290937	-0.641382	-0.326414	-0.95184	0.383886	3.70861	1.31506	2.29698	-0.00522674	1.58074	3.02242	1.2407	TC298605	AT1G19210.1	NM_101779	AP2 domain-containing transcription factor, putative	GO:0003677(DNA binding)|GO:0003700(transcription factor activity)|GO:0005634(nucleus)|GO:0006355(regulation of transcription, DNA-dependent)
A_84_P19573	0.0383313	-0.749106	-1.30544	-1.20248	0.0158764	-0.212522	-0.684171	-0.334982	-0.0176342	0.46234	0.839323	0.231754	NP221691	AT1G48100.1	NM_103706	glycoside hydrolase family 28 protein / polygalacturonase (pectinase) family protein	GO:0004650(polygalacturonase activity)|GO:0005975(carbohydrate metabolic process)
A_84_P12851	0.423899	-0.581646	-1.37391	-0.801504	-0.0351107	1.02286	-0.262897	0.655763	-0.0149577	1.18568	1.43506	0.879162	TC287934	AT4G10500.1	NM_117118	oxidoreductase, 2OG-Fe(II) oxygenase family protein	GO:0016706(oxidoreductase activity, acting on paired donors, with incorporation or reduction of molecular oxygen, 2-oxoglutarate as one donor, and incorporation of one atom each of oxygen into both donors)|GO:0019748(secondary metabolic process)
A_84_P16037	0.386195	-0.186809	-1.92995	-0.837798	0.0412794	-0.2673	-1.84496	-0.849709	0.0361182	0.746597	1.47128	1.02131	TC291247	AT1G56650.1	NM_104541	PAP1 (PRODUCTION OF ANTHOCYANIN PIGMENT 1); DNA binding / transcription factor	GO:0003677(DNA binding)|GO:0003700(transcription factor activity)|GO:0003993(acid phosphatase activity)|GO:0004722(protein serine/threonine phosphatase activity)|GO:0006355(regulation of transcription, DNA-dependent)|GO:0008150(biological_process)|GO:0009651(response to salt stress)|GO:0009718(anthocyanin biosynthetic process)|GO:0009733(response to auxin stimulus)|GO:0009745(sucrose mediated sig…
A_84_P18763	-0.353959	-1.08638	-2.27952	-1.57592	0.0449253	-1.2414	-2.56224	-2.97506	0.0108599	0.747156	0.509062	0.267194	TC286694	AT5G45820.1	NM_123950	CIPK20 (CBL-INTERACTING PROTEIN KINASE 20); kinase	GO:0004674(protein serine/threonine kinase activity)|GO:0005829(cytosol)|GO:0009737(response to abscisic acid stimulus)|GO:0016301(kinase activity)
A_84_P18401	0.0445309	-1.4277	-1.84511	-1.17249	-0.0333127	-0.695686	0.335116	-1.10851	-0.0260529	-0.288093	-0.227118	-0.750427	TC281774	AT3G12580.1	NM_112093	HSP70 (heat shock protein 70); ATP binding	GO:0005524(ATP binding)|GO:0005829(cytosol)|GO:0006457(protein folding)|GO:0009408(response to heat)|GO:0009615(response to virus)|GO:0009617(response to bacterium)|GO:0009644(response to high light intensity)|GO:0042542(response to hydrogen peroxide)
A_84_P21761	-0.317529	-1.49395	-1.54592	-1.52596	-0.000364993	-0.683791	-0.770517	-0.98299	-0.00115253	0.753468	0.822837	0.204694	TC287432	AT1G64500.1	NM_105125	glutaredoxin family protein	GO:0005575(cellular_component)|GO:0006118(electron transport)|GO:0006499(N-terminal protein myristoylation)|GO:0030508(thiol-disulfide exchange intermediate activity)
A_84_P12395	-0.00747176	-1.30078	-1.60588	-1.21226	-0.0112306	-0.969539	-1.12192	-1.03149	-0.0586953	0.712087	1.06426	0.538642	TC307856	AT1G32900.1	NM_103023	starch synthase, putative	GO:0009058(biosynthetic process)|GO:0009250(glucan biosynthetic process)|GO:0009507(chloroplast)|GO:0016757(transferase activity, transferring glycosyl groups)
A_84_P221276	-0.0198227	-1.07667	-1.18325	-1.22276	0.073555	-0.436088	-0.721145	-0.434718	-0.000683347	0.499591	0.366503	0.6885	TC292921	AT5G22390.1	NM_122144	hypothetical protein
A_84_P19508	-0.0239669	-1.14441	-1.75411	-1.19285	-0.0743364	-0.564433	-1.2713	-0.441353	-0.0369199	-0.258872	0.00881276	-0.481631	TC299672	AT4G23680.1	NM_118499	major latex protein-related / MLP-related	GO:0003674(molecular_function)|GO:0005575(cellular_component)|GO:0006952(defense response)|GO:0009607(response to biotic stimulus)
A_84_P258120	0.329525	-1.16534	-2.07753	-0.824362	-0.153152	2.75858	2.89738	2.73156	-0.0990434	-0.862536	-1.32771	-1.08132	TC303895	AT1G75830.1	NM_106233	LCR67/PDF1.1 (Low-molecular-weight cysteine-rich 67)	GO:0003674(molecular_function)|GO:0005618(cell wall)|GO:0006952(defense response)
A_84_P850790	0.0958897	-0.966992	-1.01184	-1.05499	0.0945381	-0.203805	-0.183673	0.0259618	0.00963514	0.411558	0.779815	0.306942	TC305469	BP783345
A_84_P21596	-0.188934	-1.04876	-1.35069	-1.33544	0.0239378	-0.237508	-1.09715	-0.783592	-0.00675785	0.50493	0.261369	0.337127		AT5G44530.1	NM_123820	subtilase family protein	GO:0004289(subtilase activity)|GO:0006508(proteolysis)|GO:0012505(endomembrane system)
A_84_P146938	0.536607	-0.091193	-1.1007	-0.598836	-0.0480757	1.44651	-0.0916151	1.05803	-0.0180972	1.79835	1.76902	1.78735	TC298273	AT1G02450.1	NM_100126	NIMIN-1/NIMIN1; protein binding	GO:0005515(protein binding)|GO:0005575(cellular_component)|GO:0010112(regulation of systemic acquired resistance)|GO:0016481(negative regulation of transcription)|GO:0042742(defense response to bacterium)
A_84_P18655	0.264513	-0.289329	-1.15044	-0.86728	-0.0436887	-0.300851	-0.810561	-0.202567	0.0639935	0.64228	1.03637	0.465791	NP173293	AT1G62710.1	NM_104948	BETA-VPE (vacuolar processing enzyme beta); cysteine-type endopeptidase	GO:0004197(cysteine-type endopeptidase activity)|GO:0006508(proteolysis)|GO:0006624(vacuolar protein processing)|GO:0012505(endomembrane system)
A_84_P94599	0.0461794	-1.25845	-1.10129	-1.07845	-0.0284574	-0.534169	-0.965543	-0.814677	0.0373041	0.738384	1.06809	0.53146	TC295116	AT3G56290.1	NM_115487	hypothetical protein	GO:0003674(molecular_function)|GO:0008150(biological_process)
A_84_P17111	0.336474	-0.942982	-1.32359	-0.782204	-0.062162	-0.316536	-0.963339	-0.61672	0.0204559	1.26077	1.59737	0.802486	TC296923	AT1G02820.1	NM_100163	late embryogenesis abundant 3 family protein / LEA3 family protein	GO:0003674(molecular_function)|GO:0009790(embryonic development)
A_84_P831167	0.113316	-1.02275	-1.06696	-0.99398	0.0279632	-0.207567	-0.749097	-0.378748	0.063488	0.679026	0.797834	0.478164	TC294131	AT1G69730.1	NM_105641	protein kinase family protein	GO:0006468(protein amino acid phosphorylation)|GO:0012505(endomembrane system)|GO:0016301(kinase activity)
A_84_P580314	-0.00112712	-0.772482	-1.40209	-1.1055	-0.0516044	0.010865	-0.155406	0.322028	0.0166902	0.792042	1.01749	0.975143	TC298904	AT3G22235.1	NM_180292	hypothetical protein	GO:0003674(molecular_function)|GO:0008150(biological_process)|GO:0012505(endomembrane system)
A_84_P23174	-0.00442946	-1.20692	-0.635397	-1.10511	-0.0236873	-0.288388	-0.788664	-0.549052	-0.0670888	0.403195	0.657027	0.33478	TC291909	AT3G52720.1	NM_115132	carbonic anhydrase family protein	GO:0004089(carbonate dehydratase activity)|GO:0006730(one-carbon compound metabolic process)|GO:0008270(zinc ion binding)|GO:0012505(endomembrane system)
A_84_P827393	0.228956	-0.683188	-0.865456	-0.839231	-0.0319196	1.16549	0.257509	0.542759	0.0451067	1.56445	1.92386	0.821323	NP162702	AT3G48650.1		pseudo
A_84_P115562	0.103471	-0.186035	-1.85996	-0.952615	-0.0147207	1.18835	-0.31282	1.86243	-0.00438913	1.35624	1.93894	2.66974	NP282090	AT1G73325.1	NM_105992	trypsin and protease inhibitor family protein / Kunitz family protein	GO:0004866(endopeptidase inhibitor activity)|GO:0008150(biological_process)|GO:0012505(endomembrane system)
A_84_P559896	0.110921	-0.818671	-1.28407	-0.928317	-0.0206494	-0.279927	-1.85602	-1.14309	-0.034546	0.813018	1.15871	0.35762	TC302010	AT3G44450.1	NM_114313	hypothetical protein	GO:0003674(molecular_function)|GO:0005575(cellular_component)|GO:0008150(biological_process)
A_84_P594936	0.0188616	-1.07945	-0.306632	-1.01881	0.0863016	1.92671	1.1393	1.02317	0.0430888	1.12514	1.39676	0.3253	TC314168	AT5G45340.2	NM_123902	CYP707A3 (cytochrome P450, family 707, subfamily A, polypeptide 3); oxygen binding	GO:0009414(response to water deprivation)|GO:0009639(response to red or far red light)|GO:0010295((+)-abscisic acid 8'-hydroxylase activity)|GO:0012505(endomembrane system)|GO:0019825(oxygen binding)|GO:0046345(abscisic acid catabolic process)
A_84_P226889	0.0444275	-1.11937	-1.17884	-0.986057	-0.0214959	0.485505	-0.0914249	-0.129405	0.0409897	0.726771	1.01398	0.71128	TC296039	AT4G20000.1	NM_118119	VQ motif-containing protein	GO:0003674(molecular_function)|GO:0005575(cellular_component)|GO:0008150(biological_process)
A_84_P23582	0.0119268	-0.833726	-0.948415	-1.01025	-0.0263438	-0.278007	-1.12595	-0.49096	0.00680237	0.0178483	0.345973	-0.518177	TC304672	AT5G15950.1	NM_121600	adenosylmethionine decarboxylase family protein	GO:0004014(adenosylmethionine decarboxylase activity)|GO:0005575(cellular_component)|GO:0006596(polyamine biosynthetic process)|GO:0006597(spermine biosynthetic process)|GO:0008295(spermidine biosynthetic process)
A_84_P573393	0.128027	-0.528334	-0.417852	-0.887349	-0.0124587	2.09263	0.749747	1.06098	-0.0343034	1.09897	1.74737	0.58452	TC300732	AT4G27654.1	NM_118903	hypothetical protein	GO:0003674(molecular_function)|GO:0008150(biological_process)|GO:0012505(endomembrane system)
A_84_P20170	0.0515688	-0.751194	-1.13125	-0.957946	0.00291989	-0.642928	-1.22646	-0.95745	-0.0387699	1.219	0.919893	1.12245	TC289724	AT2G01890.1	NM_126250	PAP8 (PURPLE ACID PHOSPHATASE PRECURSOR); acid phosphatase/ protein serine/threonine phosphatase	GO:0003993(acid phosphatase activity)|GO:0004722(protein serine/threonine phosphatase activity)|GO:0012505(endomembrane system)|GO:0016311(dephosphorylation)
A_84_P223559	-0.061698	-0.956838	-1.53875	-1.06034	-0.0367388	0.133596	-0.156042	0.414049	-0.0286622	0.767771	0.894822	0.706374	TC302039	AT2G14560.1	NM_127019	hypothetical protein	GO:0003674(molecular_function)|GO:0005575(cellular_component)|GO:0008150(biological_process)|GO:0009751(response to salicylic acid stimulus)|GO:0050832(defense response to fungus)
A_84_P22977	0.250844	-0.585304	-1.358	-0.742931	0.0923939	-0.0857433	-1.33612	-0.489286	-0.00492696	1.12864	1.15801	1.23623	TC284970	AT2G23000.1	NM_127865	SCPL10 (serine carboxypeptidase-like 10); serine carboxypeptidase	GO:0004185(serine carboxypeptidase activity)|GO:0006508(proteolysis)|GO:0012505(endomembrane system)
A_84_P795530	0.0196414	-1.02254	-1.22571	-0.962054	0.0113539	-0.625796	-0.635104	-0.717509	-0.0378582	0.445912	0.0388675	0.668721	TC292921	AT5G22390.1	NM_122144	hypothetical protein
A_84_P858735	0.107402	-0.709322	-1.30925	-0.872942	0.00988192	-0.311066	-1.45599	-0.820237	-0.00607853	0.433012	0.258622	0.41403	TC311757	AT3G02870.2	NM_001035549	VTC4; 3'(2'),5'-bisphosphate nucleotidase/ L-galactose-1-phosphate phosphatase/ inositol or phosphatidylinositol phosphatase	GO:0004437(inositol or phosphatidylinositol phosphatase activity)|GO:0005575(cellular_component)|GO:0006790(sulfur metabolic process)|GO:0008441(3'(2'),5'-bisphosphate nucleotidase activity)|GO:0010347(L-galactose-1-phosphate phosphatase activity)|GO:0019853(L-ascorbic acid biosynthetic process)
A_84_P297634	0.216417	-0.25675	-0.715937	-0.762557	0.0151549	0.0759794	-0.324788	-0.0317538	0.00211199	-0.240878	0.734561	-0.908523	TC286160	AT5G15500.1	NM_180494	ankyrin repeat family protein	GO:0005515(protein binding)|GO:0008150(biological_process)|GO:0012505(endomembrane system)
A_84_P14954	-0.173267	-0.91162	-1.4292	-1.15211	-0.000590127	-0.0493391	-0.831984	-0.466853	-0.0198264	1.4383	1.87527	1.48686	TC298622	AT1G73600.1	NM_001124125	phosphoethanolamine N-methyltransferase	GO:0000234(phosphoethanolamine N-methyltransferase activity)|GO:0008152(metabolic process)
A_84_P13826	-0.00543006	-1.13756	-1.11826	-0.980847	0.00094624	-0.0517792	-1.25436	-0.254417	0.0395201	0.227463	0.828966	0.624894	TC284469	AT4G21760.1	NM_118296	BGLU47 (Beta-glucosidase 47); hydrolase, hydrolyzing O-glycosyl compounds	GO:0004553(hydrolase activity, hydrolyzing O-glycosyl compounds)|GO:0005975(carbohydrate metabolic process)|GO:0012505(endomembrane system)
A_84_P57860	-0.226629	-1.20714	-1.13855	-1.19966	0.00124671	-0.157562	-0.761182	-0.377749	0.00275523	0.737016	1.14046	0.383737	TC309241	AT1G65490.1	NM_105223	hypothetical protein	GO:0003674(molecular_function)|GO:0008150(biological_process)|GO:0012505(endomembrane system)
A_84_P23899	0.10609	-1.18097	-1.29066	-0.866584	0.00698021	0.172133	0.276342	0.330233	-0.0123544	0.0711114	0.156831	0.166435	TC297610	AT2G29500.1	NM_128504	17.6 kDa class I small heat shock protein (HSP17.6B-CI)	GO:0003674(molecular_function)|GO:0006979(response to oxidative stress)|GO:0009408(response to heat)|GO:0009644(response to high light intensity)|GO:0042542(response to hydrogen peroxide)
A_84_P23539	-0.211606	-1.33714	-1.37164	-1.17761	0.00186772	-0.206246	-0.519045	-0.437792	-0.0244044	0.680184	0.967283	0.0486906	NP225790	AT5G58770.1	NM_125264	dehydrodolichyl diphosphate synthase, putative / DEDOL-PP synthase, putative	GO:0019408(dolichol biosynthetic process)|GO:0045547(dehydrodolichyl diphosphate synthase activity)
A_84_P216038	-0.0318843	-0.948331	-0.999807	-0.991152	-0.00635956	-0.320742	-0.427025	0.00191	-0.0435687	0.363279	0.622113	0.280623	TC314310	AT4G14400.1	NM_117519	ACD6 (ACCELERATED CELL DEATH 6); protein binding	GO:0005515(protein binding)|GO:0008219(cell death)|GO:0009751(response to salicylic acid stimulus)|GO:0009816(defense response to bacterium, incompatible interaction)|GO:0016020(membrane)
A_84_P813784	-0.160577	-0.429764	-1.50862	-1.11169	-0.0386861	-0.394921	-1.13267	-0.811384	-0.0103962	0.143527	0.804561	-0.144869	TC281050	AT2G39800.2	NM_201912	P5CS1 (DELTA1-PYRROLINE-5-CARBOXYLATE SYNTHASE 1)	GO:0005737(cytoplasm)|GO:0006561(proline biosynthetic process)|GO:0006979(response to oxidative stress)|GO:0009269(response to desiccation)|GO:0009414(response to water deprivation)|GO:0009507(chloroplast)|GO:0009651(response to salt stress)|GO:0009737(response to abscisic acid stimulus)|GO:0017084(delta1-pyrroline-5-carboxylate synthetase activity)|GO:0042538(hyperosmotic salinity response)|GO:0…
A_84_P15036	-0.141001	-1.02173	-1.3698	-1.08115	-0.00228617	0.0815327	-0.462606	0.217486	0.0360709	0.675225	1.0547	0.59753	TC280877	AT5G60900.1	NM_125483	RLK1 (RECEPTOR-LIKE PROTEIN KINASE 1); carbohydrate binding / kinase	GO:0006468(protein amino acid phosphorylation)|GO:0012505(endomembrane system)|GO:0016301(kinase activity)|GO:0030246(carbohydrate binding)
A_84_P841862	-0.0269878	-0.565526	-1.8903	-0.954702	0.00884613	-0.251132	-0.650496	0.0572	-0.0201714	-2.61756	-1.57368	-2.50328	NP230452	AT5G53710.1	NM_124750	hypothetical protein	GO:0003674(molecular_function)|GO:0008150(biological_process)|GO:0012505(endomembrane system)
A_84_P844482	0.0377761	-0.899342	-0.868078	-0.886976	-0.00772817	-0.349613	-0.460892	-0.013609	-0.0730651	0.378051	0.671427	0.262107	TC282141	AT4G14400.1	NM_117519	ACD6 (ACCELERATED CELL DEATH 6); protein binding	GO:0005515(protein binding)|GO:0008219(cell death)|GO:0009751(response to salicylic acid stimulus)|GO:0009816(defense response to bacterium, incompatible interaction)|GO:0016020(membrane)
A_84_P14701	0.0245929	-0.863443	-0.962775	-0.893871	-0.0668651	-0.456535	-1.04525	-1.09102	-0.0205578	0.426913	0.750041	0.107265	TC282723	AT3G61880.1	NM_116053	CYP78A9 (CYTOCHROME P450 78A9); oxygen binding	GO:0004497(monooxygenase activity)|GO:0010154(fruit development)|GO:0012505(endomembrane system)|GO:0019825(oxygen binding)
A_84_P19718	0.0285663	-0.512602	-1.32702	-0.886274	-0.00528069	-1.32124	-1.80989	-1.15281	-0.0340675	-1.44612	-0.605414	-0.162626	TC306548	AT5G48000.1	NM_001125923	CYP708A2 (cytochrome P450, family 708, subfamily A, polypeptide 2); oxygen binding	GO:0005783(endoplasmic reticulum)|GO:0019825(oxygen binding)|GO:0048364(root development)
A_84_P178164	-0.104692	-0.0945862	-1.33696	-1.00778	0.0203475	-0.153863	-1.22677	-0.820305	-0.018445	-0.601189	-0.278604	-0.341175	TC304463	AT1G70850.1	NM_001036188	MLP34 (MLP-LIKE PROTEIN 34)	GO:0003674(molecular_function)|GO:0005575(cellular_component)|GO:0006952(defense response)|GO:0009607(response to biotic stimulus)
A_84_P284920	-0.166949	-0.932378	-1.12456	-1.0652	0.00594839	-0.668132	-1.49283	-0.905185	-0.00495887	0.67849	0.679993	0.506242	TC284758	AT3G01060.1	NM_110971	hypothetical protein	GO:0003674(molecular_function)|GO:0008150(biological_process)
A_84_P808192	-0.0599224	0.048782	-1.25317	-0.955652	0.00809365	-0.198969	-1.18612	-0.830578	0.0302368	-0.577613	-0.216027	-0.271467	TC304964	AT1G70850.3	NM_001036188	MLP34 (MLP-LIKE PROTEIN 34)	GO:0003674(molecular_function)|GO:0005575(cellular_component)|GO:0006952(defense response)|GO:0009607(response to biotic stimulus)
A_84_P567338	-0.0044124	-0.933733	-1.08306	-0.894815	-0.00672456	-0.569329	-0.669272	-0.536008	0.0293444	0.723672	0.913054	0.318895	TC312144	AT5G55570.1	NM_124939	heat shock protein binding / unfolded protein binding	GO:0006457(protein folding)|GO:0009507(chloroplast)|GO:0031072(heat shock protein binding)|GO:0051082(unfolded protein binding)
A_84_P59510	0.000273851	-0.861141	-0.834913	-0.888707	-0.00436498	-0.206412	0.613915	-0.463969	-0.00112829	-0.300934	-0.421249	0.0224737	TC291797	AT4G32480.1	NM_119400	hypothetical protein	GO:0003674(molecular_function)|GO:0005575(cellular_component)|GO:0008150(biological_process)
A_84_P787353	0.13884	-0.50586	-0.200209	-0.740429	-0.023977	2.02064	1.21559	0.972337	0.026164	1.09516	1.35525	0.161872	TC292113	AT5G17350.1	NM_121741	hypothetical protein	GO:0003674(molecular_function)|GO:0005575(cellular_component)|GO:0006499(N-terminal protein myristoylation)
A_84_P11287	-0.034146	-0.902613	-1.12785	-0.909359	-0.0253357	-0.334251	-0.931945	-0.720142	-0.0065812	0.631227	0.414685	0.235129	TC297457	AT5G15600.1	NM_121564	SP1L4 (SPIRAL1-LIKE4)	GO:0003674(molecular_function)|GO:0005575(cellular_component)|GO:0008150(biological_process)
A_84_P20353	0.0368544	-0.443806	-0.88562	-0.836129	-0.0288562	-0.16333	-1.05724	-0.73457	0.00653382	0.623412	0.592407	0.377568	TC302484	AT3G56080.1	NM_115466	dehydration-responsive protein-related	GO:0005575(cellular_component)|GO:0008150(biological_process)
A_84_P757222	-0.0166389	0.0080127	-1.98401	-0.889371	-0.0222695	-0.921129	-1.56019	-0.350551	0.0303594	1.09347	1.45411	1.70598		AT2G16367.1		pseudo
A_84_P515865	0.198974	-0.544471	-0.815554	-0.671148	-0.0833097	0.580653	-0.194476	0.236713	0.0214109	1.22134	1.32402	0.994404	TC309199	AT5G26690.1	NM_180545	heavy-metal-associated domain-containing protein	GO:0005575(cellular_component)|GO:0030001(metal ion transport)|GO:0046872(metal ion binding)
A_84_P57310	0.203851	-0.344917	-0.772321	-0.658448	-0.0564557	-0.38463	-1.28513	-0.662449	-0.0167436	0.359189	0.543658	0.716342	NP188132	AT4G28250.1	NM_118965	ATEXPB3 (ARABIDOPSIS THALIANA EXPANSIN B3)	GO:0003674(molecular_function)|GO:0005576(extracellular region)|GO:0006949(syncytium formation)|GO:0009664(plant-type cell wall organization and biogenesis)|GO:0009826(unidimensional cell growth)|GO:0009828(plant-type cell wall loosening)|GO:0012505(endomembrane system)
A_84_P754645	-0.0985883	-0.978315	-1.1396	-0.946208	0.0067586	-0.196133	-0.276805	-0.294108	0.012378	0.093744	0.387898	-0.0353487		AT1G31540.2	NM_001123924	disease resistance protein (TIR-NBS-LRR class), putative	GO:0000166(nucleotide binding)|GO:0004888(transmembrane receptor activity)|GO:0005515(protein binding)|GO:0005524(ATP binding)|GO:0006952(defense response)|GO:0017111(nucleoside-triphosphatase activity)|GO:0031224(intrinsic to membrane)
A_84_P762197	0.0904774	0.0531232	-1.16674	-0.747498	-0.0205773	-1.02158	-0.899519	-0.247609	-0.00674658	-1.79918	-1.16511	-2.29887	TC301957	AT3G03341.1	NM_001125087	hypothetical protein
A_84_P20509	0.135321	-0.621507	-0.952551	-0.694032	-0.0100444	0.0938266	-0.37605	-0.519334	-0.00448479	0.677532	0.353668	0.393306	TC287680	AT1G48260.1	NM_103723	CIPK17 (SNF1-RELATED PROTEIN KINASE 3.21); kinase	GO:0005575(cellular_component)|GO:0006468(protein amino acid phosphorylation)|GO:0007165(signal transduction)|GO:0016301(kinase activity)
A_84_P753680	0.011353	-0.670348	-0.9584	-0.817672	-0.0783219	0.0705225	-0.301394	0.131397	-0.0368872	0.932322	1.16677	0.87396		AT1G24147.1	NM_001084124	hypothetical protein	GO:0012505(endomembrane system)
A_84_P567134	0.0213973	-0.520579	-0.316022	-0.803885	-0.0705996	1.52207	0.749987	0.717422	0.00307818	1.03035	1.54205	0.293734	TC301238	AT4G27657.1	NM_118904	hypothetical protein	GO:0003674(molecular_function)|GO:0008150(biological_process)|GO:0012505(endomembrane system)
A_84_P108312	0.096599	-0.836395	-1.0225	-0.725277	0.0449561	-0.0273692	-0.49919	0.0480581	-0.0104253	0.3783	0.485853	0.345972	TC283177	AT2G46440.1	NM_130208	ATCNGC11 (cyclic nucleotide gated channel 11); calmodulin binding / cyclic nucleotide binding / ion channel	GO:0005216(ion channel activity)|GO:0005261(cation channel activity)|GO:0005516(calmodulin binding)|GO:0009620(response to fungus)|GO:0016020(membrane)|GO:0030551(cyclic nucleotide binding)
A_84_P14108	-0.21132	-0.880758	-1.08261	-1.033	-0.0173206	-0.472828	-1.08126	-0.95062	-0.0236304	0.487187	0.361408	0.293813	TC304804	AT5G64940.1	NM_125893	ATATH13 (ABC2 homolog 13)	GO:0005215(transporter activity)|GO:0006810(transport)|GO:0009507(chloroplast)
A_84_P586330	0.35873	0.0195743	-0.82126	-0.460986	-0.0642044	0.285112	0.437109	1.38497	0.0157922	-0.859992	-0.489601	-1.46868	TC281439	AT1G69480.1	NM_105615	EXS family protein / ERD1/XPR1/SYG1 family protein	GO:0003674(molecular_function)|GO:0008150(biological_process)|GO:0016021(integral to membrane)
A_84_P793001	0.0644315	-0.747512	-0.93577	-0.752538	0.0615796	1.54968	0.541957	0.897872	0.0419248	1.0622	1.39012	0.918804	TC280847	AT1G17420.1	NM_101603	LOX3 (Lipoxygenase 3); iron ion binding / lipoxygenase/ metal ion binding / oxidoreductase, acting on single donors with incorporation of molecular oxygen, incorporation of two atoms of oxygen	GO:0005506(iron ion binding)|GO:0006952(defense response)|GO:0009507(chloroplast)|GO:0009611(response to wounding)|GO:0009695(jasmonic acid biosynthetic process)|GO:0016165(lipoxygenase activity)|GO:0016702(oxidoreductase activity, acting on single donors with incorporation of molecular oxygen, incorporation of two atoms of oxygen)|GO:0040007(growth)|GO:0046872(metal ion binding)
A_84_P15627	0.017055	-0.621876	-1.28954	-0.798513	0.000305119	-0.450556	-0.868757	-0.584605	0.039548	0.626889	0.671522	0.493572	TC287734	AT3G57020.1	NM_115561	strictosidine synthase family protein	GO:0005783(endoplasmic reticulum)|GO:0009821(alkaloid biosynthetic process)|GO:0016844(strictosidine synthase activity)
A_84_P819549	0.272336	-0.575863	-0.174832	-0.538799	0.057118	1.82244	0.881654	1.23095	0.0356445	0.47707	1.03833	0.261102	TC295981	AT5G41740.1	NM_123539	disease resistance protein (TIR-NBS-LRR class), putative	GO:0000166(nucleotide binding)|GO:0004888(transmembrane receptor activity)|GO:0005515(protein binding)|GO:0005524(ATP binding)|GO:0006952(defense response)|GO:0009507(chloroplast)|GO:0017111(nucleoside-triphosphatase activity)|GO:0031224(intrinsic to membrane)
A_84_P166733	0.0505958	-0.48446	-0.150259	-0.757051	-0.0244335	2.18841	1.31611	1.22048	-0.0218817	1.14498	1.424	0.180463	TC292113	AT5G17350.1	NM_121741	hypothetical protein	GO:0003674(molecular_function)|GO:0005575(cellular_component)|GO:0006499(N-terminal protein myristoylation)
A_84_P16510	-0.0866887	-0.861372	-0.767461	-0.893563	-0.0218047	0.240507	-0.102193	0.199579	-0.0532892	0.526572	0.912674	0.335683	TC312490	AT1G35710.1	NM_103273	leucine-rich repeat transmembrane protein kinase, putative	GO:0004674(protein serine/threonine kinase activity)|GO:0005524(ATP binding)|GO:0006468(protein amino acid phosphorylation)|GO:0007169(transmembrane receptor protein tyrosine kinase signaling pathway)|GO:0012505(endomembrane system)
A_84_P19357	-0.147596	-0.719553	-1.18754	-0.953706	0.00402467	0.43227	-1.96357	-0.320402	0.0294289	1.3922	2.01567	1.58176	TC287351	AT3G44990.1	NM_114368	XTR8 (xyloglucan:xyloglucosyl transferase 8); hydrolase, acting on glycosyl bonds	GO:0005618(cell wall)|GO:0016762(xyloglucan:xyloglucosyl transferase activity)|GO:0016798(hydrolase activity, acting on glycosyl bonds)|GO:0042546(cell wall biogenesis)|GO:0048046(apoplast)
A_84_P196584	0.0340897	-0.641591	-0.739586	-0.764484	-0.0148807	1.10919	0.207533	0.541513	0.0672191	1.55511	1.94189	0.83382	NP162702	AT3G48650.1		pseudo
A_84_P818265	0.0157802	-0.854606	-0.781658	-0.781575	0.00375874	-0.469184	0.563325	-0.666082	0.0313757	-0.473967	-0.612363	-0.129871	TC291797	AT4G32480.1	NM_119400	hypothetical protein	GO:0003674(molecular_function)|GO:0005575(cellular_component)|GO:0008150(biological_process)
A_84_P260340	0.0654243	-0.763257	-1.06068	-0.727999	-0.0176637	-0.597491	-1.4645	-1.10133	0.0192201	0.950253	0.830579	0.484448	TC290373	AT1G76240.1	NM_106274	hypothetical protein	GO:0003674(molecular_function)|GO:0009507(chloroplast)
A_84_P20655	-0.123279	-0.868516	-1.26739	-0.915771	0.00817092	-0.921981	-1.40493	-2.08768	-0.00325013	0.0338368	-0.796661	-0.333938	TC311156	AT5G45830.1	NM_123951	DOG1 (DELAY OF GERMINATION 1)	GO:0003674(molecular_function)|GO:0005575(cellular_component)|GO:0010162(seed dormancy)
A_84_P10559	0.204578	-0.593207	-0.691412	-0.583399	-0.0151928	0.884446	0.206984	0.636641	-0.0248191	0.738688	1.19631	0.456528	TC302718	AT1G01560.1	NM_001123738	ATMPK11 (Arabidopsis thaliana MAP kinase 11); MAP kinase/ kinase	GO:0004707(MAP kinase activity)|GO:0005575(cellular_component)|GO:0007165(signal transduction)|GO:0009737(response to abscisic acid stimulus)|GO:0016301(kinase activity)
A_84_P761052	-0.0310297	-0.953397	-0.539618	-0.81575	0.00181579	-0.19596	-0.790573	-0.449515	-0.00652277	0.591995	0.823302	0.565906	TC298947	AT3G52720.2	NM_180354	carbonic anhydrase family protein	GO:0004089(carbonate dehydratase activity)|GO:0006730(one-carbon compound metabolic process)|GO:0008270(zinc ion binding)|GO:0012505(endomembrane system)
A_84_P14878	-0.0230724	-0.855214	-0.841214	-0.8048	-0.00997035	-0.540411	-1.54022	-0.83353	-0.00707336	0.471411	0.948559	0.826754	TC289398	AT5G04950.1	NM_120577	nicotianamine synthase, putative	GO:0030410(nicotianamine synthase activity)
A_84_P11046	0.32781	-0.49038	-0.0815723	-0.453461	-0.00555996	2.55234	0.941552	1.53478	-0.00761301	0.662289	1.79491	0.356032	TC292586	AT4G34410.1	NM_119606	AP2 domain-containing transcription factor, putative	GO:0003677(DNA binding)|GO:0003700(transcription factor activity)|GO:0005634(nucleus)|GO:0006355(regulation of transcription, DNA-dependent)
A_84_P103716	-0.138355	-0.856468	-1.32598	-0.915789	-0.0332979	-0.167592	-0.834761	0.162301	0.0281487	1.19318	1.2002	1.64864	TC292333	AT5G03350.1	NM_120414	legume lectin family protein	GO:0008150(biological_process)|GO:0012505(endomembrane system)|GO:0030246(carbohydrate binding)
A_84_P756427	0.558758	-0.886325	-1.35573	-0.21449	0.0353775	1.03248	-0.860574	-0.0544207	-0.0252085	3.12112	3.59135	2.26877	TC289330	AT2G27420.1	NM_128302	cysteine proteinase, putative	GO:0006508(proteolysis)|GO:0008234(cysteine-type peptidase activity)|GO:0012505(endomembrane system)
A_84_P15740	0.00137723	-0.685552	-0.635638	-0.770821	-0.0383216	0.10898	-0.46816	-0.41904	-0.0152239	0.970585	1.14159	0.625887		AT4G27030.1	NM_118837	small conjugating protein ligase	GO:0009507(chloroplast)|GO:0019787(small conjugating protein ligase activity)|GO:0043687(post-translational protein modification)|GO:0051246(regulation of protein metabolic process)
A_84_P18473	0.112021	-0.528993	-0.666266	-0.654067	0.00340122	0.293179	-0.609407	0.0527495	0.00142839	0.569016	0.779958	0.35946	TC293792	AT3G59140.1	NM_115776	ATMRP14 (Arabidopsis thaliana multidrug resistance-associated protein 14)	GO:0006810(transport)|GO:0016021(integral to membrane)|GO:0042626(ATPase activity, coupled to transmembrane movement of substances)
A_84_P15370	0.00516187	-0.837959	-0.697245	-0.759099	0.00221416	0.0752263	-0.205525	0.406183	-0.014841	0.493317	0.823042	1.08401	TC286577	AT1G04980.1	NM_100376	ATPDIL2-2 (PDI-LIKE 2-2); thiol-disulfide exchange intermediate	GO:0009505(plant-type cell wall)|GO:0030508(thiol-disulfide exchange intermediate activity)|GO:0045454(cell redox homeostasis)
A_84_P548594	0.0745311	-0.51095	-0.734556	-0.688694	-0.041748	-0.305519	-1.72619	-1.16156	-0.0204932	0.36109	0.667391	-0.0470345		AT5G05840.1	NM_120666	hypothetical protein	GO:0003674(molecular_function)|GO:0005575(cellular_component)|GO:0008150(biological_process)
A_84_P712672	0.0340954	-0.0223501	-0.312912	-0.726938	-0.0262023	3.05342	1.26624	1.53461	0.0318784	3.1124	3.48657	1.65829		BX824487		ATERF-4/ATERF4/ERF4/RAP2.5 (ETHYLENE RESPONSIVE ELEMENT BINDING FACTOR 4); DNA binding / protein binding / transcription factor/ transcription repressor
A_84_P579612	-0.00904033	-0.536702	-0.433463	-0.767984	-0.0142246	1.72164	0.786363	0.811341	0.0393976	1.29997	1.6	0.730251	TC299058	AT4G27652.1	NM_118902	hypothetical protein	GO:0003674(molecular_function)|GO:0008150(biological_process)
A_84_P23973	-0.186304	-0.887715	-1.22955	-0.942432	-0.0552158	-0.566374	-1.48608	-0.615454	-0.00435901	0.387428	0.752076	0.928526	TC307964	AT3G03780.2	NM_111249	AtMS2 (Arabidopsis thaliana methionine synthase 2); 5-methyltetrahydropteroyltriglutamate-homocysteine S-methyltransferase	GO:0003871(5-methyltetrahydropteroyltriglutamate-homocysteine S-methyltransferase activity)|GO:0005829(cytosol)|GO:0008705(methionine synthase activity)|GO:0009086(methionine biosynthetic process)
A_84_P755231	0.212602	-0.479142	-0.487107	-0.540863	0.0640041	1.94841	0.362728	0.831096	0.0226305	1.04065	1.64301	0.640232	NP965742	AT2G14270.1		pseudo
A_84_P74014	-0.0642989	-0.473163	-1.52416	-0.815377	0.0124204	1.77154	1.2386	1.78204	-0.0122454	0.821298	0.620529	0.939483	TC297576	AT3G11340.1	NM_111968	UDP-glucoronosyl/UDP-glucosyl transferase family protein	GO:0008152(metabolic process)|GO:0008194(UDP-glycosyltransferase activity)|GO:0012505(endomembrane system)
A_84_P20289	0.00611764	0.174519	-1.29849	-0.734091	-0.0378545	0.215125	-0.64297	0.603324	0.00506744	0.404444	0.810295	1.00224	TC287627	AT3G28270.1	NM_113746	hypothetical protein	GO:0003674(molecular_function)|GO:0005575(cellular_component)|GO:0008150(biological_process)
A_84_P12035	0.347147	-0.0494257	-0.600944	-0.391941	-0.00948968	0.473743	-0.592824	0.00505607	0.0118086	1.54466	1.60126	1.13658	TC300677	AT5G02230.1	NM_120301	haloacid dehalogenase-like hydrolase family protein	GO:0005575(cellular_component)|GO:0008152(metabolic process)|GO:0016787(hydrolase activity)
A_84_P824268	0.155399	-0.709255	-0.359408	-0.581332	-0.00381935	1.36499	0.671733	0.801405	-0.0656676	0.812955	1.07017	0.0779954	TC289193	AT1G56660.1	NM_104542	hypothetical protein	GO:0003674(molecular_function)|GO:0005575(cellular_component)|GO:0008150(biological_process)
A_84_P20155	0.00238096	-0.858121	-0.811432	-0.7328	0.00484271	-0.3107	-0.806301	-0.499984	0.00832328	0.513054	0.433432	0.287095	TC290958	AT2G46450.1	NM_180123	ATCNGC12 (cyclic nucleotide gated channel 12); cyclic nucleotide binding / ion channel	GO:0005216(ion channel activity)|GO:0005261(cation channel activity)|GO:0009620(response to fungus)|GO:0016020(membrane)|GO:0030551(cyclic nucleotide binding)
A_84_P843330	0.345107	-0.218815	0.355674	-0.387444	-0.00220809	1.83103	0.380554	0.880305	0.0115099	1.26683	1.74039	0.229503	NP335312	NP335312
A_84_P818437	0.364661	-0.44558	-0.202204	-0.367668	0.0411849	2.30651	1.35876	1.55198	0.00852192	1.0467	1.89362	0.729026	TC308071	AT5G42380.1	NM_123603	CML37/CML39; calcium ion binding	GO:0005509(calcium ion binding)|GO:0008150(biological_process)|GO:0009507(chloroplast)
A_84_P16156	0.151704	-0.241431	-0.854454	-0.571052	-0.0440499	0.370837	-0.685371	-0.150906	0.100273	1.60303	1.14435	1.09912	NP184574	AT1G32780.1	NM_103012	alcohol dehydrogenase, putative	GO:0003824(catalytic activity)|GO:0005488(binding)|GO:0008152(metabolic process)|GO:0008270(zinc ion binding)|GO:0016491(oxidoreductase activity)
A_84_P145159	0.540552	0.586263	-1.83642	-0.181731	0.0507391	0.656352	0.872305	1.45042	-0.00644353	-0.93074	0.376799	-1.42728	TC288653	AT5G50360.1	NM_124417	hypothetical protein	GO:0003674(molecular_function)|GO:0008150(biological_process)
A_84_P66214	0.369477	-0.385791	-0.00783096	-0.345461	0.0565291	2.8141	1.53219	1.90803	-0.0418245	1.27156	2.26286	0.516687	TC287153	AT3G02840.1	NM_111152	immediate-early fungal elicitor family protein	GO:0005488(binding)|GO:0051707(response to other organism)
A_84_P755281	0.0539352	-0.657062	-0.371946	-0.659964	0.00123595	1.89565	0.516779	0.935006	-0.0288853	0.69268	1.33019	0.265544	TC295634	AT2G05050.1	NM_113628	pseudo
A_84_P868534	-0.2636	-0.918987	-1.10479	-0.972749	-0.0175528	-0.701434	-1.67375	-0.960783	0.0357698	0.792456	0.684873	0.590875	TC312273	AT3G01060.1	NM_110971	hypothetical protein	GO:0003674(molecular_function)|GO:0008150(biological_process)
A_84_P537220	0.510139	-0.713943	-0.83338	-0.196054	0.0920069	2.03484	1.31734	1.19151	-0.0306109	1.59785	1.57098	1.18676	NP231037	AT5G57510.1	NM_125132	hypothetical protein	GO:0003674(molecular_function)|GO:0008150(biological_process)
A_84_P581876	0.268963	-0.21622	-0.709168	-0.432054	-0.00899817	0.557069	-0.238214	0.199543	-0.0224552	1.70272	2.09755	1.44504		AT1G76955.1	NM_202430	Expressed protein	GO:0003674(molecular_function)|GO:0008150(biological_process)|GO:0016020(membrane)
A_84_P19248	-0.0541896	-0.688353	-0.864317	-0.750484	0.00159972	-0.384172	-1.21358	-0.782135	0.0011285	0.830508	0.685498	0.709627	NP332299	AT3G01550.1	NM_111021	triose phosphate/phosphate translocator, putative	GO:0009507(chloroplast)|GO:0009670(triose-phosphate transmembrane transporter activity)|GO:0015297(antiporter activity)|GO:0015717(triose phosphate transport)|GO:0016020(membrane)|GO:0016021(integral to membrane)
A_84_P549850	0.153295	0.115667	-1.82355	-0.542944	-0.0574618	0.458239	0.697862	1.23456	0.0265281	-1.24298	0.424401	-1.39967	TC306656	AT1G60190.1	NM_104709	armadillo/beta-catenin repeat family protein / U-box domain-containing protein	GO:0000151(ubiquitin ligase complex)|GO:0004842(ubiquitin-protein ligase activity)|GO:0005488(binding)|GO:0005515(protein binding)|GO:0008270(zinc ion binding)|GO:0016567(protein ubiquitination)
A_84_P11248	0.151403	0.104923	-1.69552	-0.543749	0.00305402	-0.198286	-0.243645	0.543198	0.0327786	-1.43964	-0.628425	-1.54821	TC284619	AT5G59220.1	NM_125312	protein phosphatase 2C, putative / PP2C, putative	GO:0004722(protein serine/threonine phosphatase activity)|GO:0009507(chloroplast)|GO:0009737(response to abscisic acid stimulus)
A_84_P22736	0.194766	-0.805481	-0.719284	-0.499052	-0.00891512	0.0147456	-0.120614	0.645211	0.0855186	1.03395	1.34884	-0.0327969	TC289189	AT1G09500.1	NM_179294	cinnamyl-alcohol dehydrogenase family / CAD family	GO:0004022(alcohol dehydrogenase activity)|GO:0009809(lignin biosynthetic process)|GO:0012505(endomembrane system)|GO:0045551(cinnamyl-alcohol dehydrogenase activity)

[truncated: 18 more sheets: WoA<Mc-6h, WoA<Mp-6h, Wt<Rp-6h, WoA=Mc-6h, WoA=Mp-6h, WoA=Rp-6h, WoA>Mc-6h, WoA>Mp-6h, WoA>Rp-6h, WoA<Mc-24h, WoA<Mp-24h, WoA<Rp-24h, WoA=Mc-24h, WoA=Mp-24h, WoA=Rp-24h, WoA>Mc-24h, WoA>Mp-24h, WoA>Rp-24h]
